# Supplementary material for: Effect of SlSAHH2 on metabolites in over-expressed and wild-type tomato fruit
Source: PeerJ. 2024 May 29;12:e17466. doi: 10.7717/peerj.17466 (PMC11143970; doi:10.7717/peerj.17466)
Supplement: Supplemental Information 1 [file peerj-12-17466-s001.xlsx]

## Sheet: 代谢物信息总览表
Details information of 733 metabolites obtained from primary and secondary mass spectrometry for three species
Metabolite	Metab ID	KEGG Pathway ID	KEGG Pathway Description	KEGG Compound ID	Library ID	Mode	KEGG Compound First Category	KEGG Compound Second Category	KEGG Pathway First Category	KEGG Pathway Second Category	HMDB Superclass	HMDB Class	M/Z	Adducts	Formula	Retention time	RSD	Fragmentation Score	Theoretical Fragmentation Score	Mass Error	CAS ID	HMDB Subclass
3-Hydroxyadipic acid	metab_1	-	-	-	HMDB0000345	pos	-	-	-	-	Organic acids and derivatives	Hydroxy acids and derivatives	325.112	M+H-H2O, 2M+H, M+ACN+H, M+H, M+H-2H2O	C6H10O5	4.3773	0.0124422	44	-	-3.33328	14292-29-6	Medium-chain hydroxy acids and derivatives
(R)-2-Ethylmalate	metab_10	map00620	Pyruvate metabolism	C02488	-	pos	-	-	Metabolism	Carbohydrate metabolism	-	-	127.039	M+H-2H2O, M+H-H2O, M+H, 2M+H	C6H10O5	1.3236	0.00867845	34.1	-	-1.60494	-	-
4-Vinylguaiacol	metab_12	-	-	C17883	-	pos	-	-	-	-	-	-	133.064	M+H-2H2O, M+H, M+NH4, M+H-H2O	C9H10O2	1.9613	0.00536323	62.8	-	-0.184197	-	-
(S)-2,3,4,5-Tetrahydropiperidine-2-carboxylate	metab_14	-	-	-	HMDB0012130	pos	-	-	-	-	Organic acids and derivatives	Carboxylic acids and derivatives	160.096	M+H-H2O, M+NH4, M+CH3OH+H, M+H-2H2O	C6H9NO2	1.305	0.015403	-	37.6	0.339215	-	Amino acids, peptides, and analogues
2-Hydroxy-p-mentha-1,8-dien-6-one	metab_15	-	-	-	HMDB0037012	pos	-	-	-	-	Lipids and lipid-like molecules	Prenol lipids	189.09	M+H-2H2O, M+Na, M+H-H2O, M+H	C10H14O2	2.2702	9.10543e-05	-	50.8	-1.75747	51200-86-3	Monoterpenoids
Octaethylene glycol	metab_16	-	-	-	HMDB0094680	pos	-	-	-	-	Organic oxygen compounds	Organooxygen compounds	371.226	M+H, M+K, M+Na, M+NH4	C16H34O9	2.6542	0.00872654	-	33.3	-3.92813	-	Ethers
(±)-Ibuprofen	metab_19	-	-	-	-	pos	-	-	-	-	-	-	189.127	M+H-H2O, M+H, M+CH3OH+H, M+H-2H2O	C13H18O2	2.9863	0.00236681	34.9	-	-3.45963	-	-
Suberic acid	metab_25	-	-	C08278	LMFA01170001;HMDB0000893	pos	Organic acids	Carboxylic acids	-	-	Lipids and lipid-like molecules	Fatty Acyls	157.085	M+H-H2O, M+Na, M+NH4, M+H	C8H14O4	2.8974	0.00967472	65.1	-	-2.8096	505-48-6	Fatty acids and conjugates
Propyl 2,4-decadienoate	metab_27	-	-	-	LMFA07011001;HMDB0037307	pos	-	-	-	-	Lipids and lipid-like molecules	Fatty Acyls	193.158	M+H-2H2O, M+H-H2O, M+H, M+NH4	C13H22O2	6.0767	0.0075299	59	-	-2.92112	-	Fatty acid esters
Dehydrophytosphingosine	metab_28	-	-	-	LMSP01030002;HMDB0038057	pos	-	-	-	-	Organic nitrogen compounds	Organonitrogen compounds	316.283	M+H, M+Na, M+H-H2O, M+H-2H2O	C18H37NO3	7.154	0.0095272	-	33	-3.97402	3687-54-5	Amines
Phytosphingosine	metab_29	map00600;map01100	Sphingolipid metabolism; Metabolic pathways	C12144	LMSP01030001;HMDB0004610	pos	-	-	Metabolism;Metabolism	Lipid metabolism;Global and overview maps	Organic nitrogen compounds	Organonitrogen compounds	318.299	M+H, M+Na, M+H-H2O, M+H-2H2O	C18H39NO3	7.4139	0.00458174	-	38.9	-4.12727	554-62-1	Amines
Lucidenic acid A	metab_31	-	-	-	HMDB0037611	pos	-	-	-	-	Lipids and lipid-like molecules	Prenol lipids	459.278	M+H, M+K, M+NH4, M+Na	C27H38O6	2.8752	0.00915823	-	32	8.6623	95311-94-7	Sesquiterpenoids
Heptaethylene glycol	metab_32	-	-	-	HMDB0061835	pos	-	-	-	-	Organic oxygen compounds	Organooxygen compounds	327.2	M+H, M+K, M+Na, M+NH4	C14H30O8	2.5253	0.00551477	-	45	-4.06648	5617-32-3	Ethers
PA(20:1(11Z)/22:6(4Z,7Z,10Z,13Z,16Z,19Z))	metab_37	-	-	-	LMGP10010555;HMDB0115115	pos	-	-	-	-	Lipids and lipid-like molecules	Glycerophospholipids	797.514	M+Na, M+K, M+2Na-H, M+NH4	C45H75O8P	10.7384	0.0152237	-	57.9	5.59463	-	Glycerophosphates
3alpha,4,5,7alpha-Tetrahydro-5-hydroxy-1H-isoindole-1,3(2H)-dione	metab_54	-	-	-	HMDB0034887	pos	-	-	-	-	Organoheterocyclic compounds	Isoindoles and derivatives	168.065	M+H-H2O, M+H, M+CH3OH+H	C8H9NO3	1.3434	0.00978798	44.7	-	-2.77216	-	Isoindolines
L-Glutamine	metab_67	map01100;map00630;map00220;map00230;map02010;map00910;map01230;map00240;map00250;map00970	Metabolic pathways; Glyoxylate and dicarboxylate metabolism; Arginine biosynthesis; Purine metabolism; ABC transporters; Nitrogen metabolism; Biosynthesis of amino acids; Pyrimidine metabolism; Alanine, aspartate and glutamate metabolism; Aminoacyl-tRNA biosynthesis	C00064	HMDB0000641	pos	Peptides	Amino acids	Metabolism;Metabolism;Metabolism;Metabolism;Environmental Information Processing;Metabolism;Metabolism;Metabolism;Metabolism;Genetic Information Processing	Global and overview maps;Carbohydrate metabolism;Amino acid metabolism;Nucleotide metabolism;Membrane transport;Energy metabolism;Global and overview maps;Nucleotide metabolism;Amino acid metabolism;Translation	Organic acids and derivatives	Carboxylic acids and derivatives	147.076	M+H-H2O, M+H, M+H-2H2O	C5H10N2O3	1.305	0.000704573	84.6	-	-1.96767	56-85-9	Amino acids, peptides, and analogues
4-Hydroxyproline galactoside	metab_68	-	-	-	HMDB0029354	pos	-	-	-	-	Lipids and lipid-like molecules	Fatty Acyls	316.099	M+H-H2O, M+H, M+Na	C11H19NO8	1.7409	0.0324098	-	71.9	-3.62894	80185-44-0	Fatty alcohol esters
3-(4-Methylphenyl)-2-propenal	metab_85	-	-	-	HMDB0029640	pos	-	-	-	-	Phenylpropanoids and polyketides	Cinnamaldehydes	147.08	M+H, M+CH3OH+H, M+H-H2O	C10H10O	2.3141	0.00423096	32	-	-3.69491	1504-75-2	Not Available
3-Methyl-5-pentyl-2-furanpropanoic acid	metab_95	-	-	-	HMDB0112084	pos	-	-	-	-	Lipids and lipid-like molecules	Fatty Acyls	189.127	M+H-2H2O, M+H-H2O, M+H	C13H20O3	3.2741	0.00802499	-	48.8	-3.14287	69662-69-7	Fatty acids and conjugates
3-Isopropylcatechol	metab_96	-	-	C01014	-	pos	-	-	-	-	-	-	170.117	M+H, M+NH4, M+H-H2O	C9H12O2	3.3407	0.00849846	40.6	-	-3.36917	-	-
Abscisic acid	metab_100	map01100;map00906;map01110;map04075	Metabolic pathways; Carotenoid biosynthesis; Biosynthesis of secondary metabolites; Plant hormone signal transduction	C06082	HMDB0036093	pos	-	-	Metabolism;Metabolism;Metabolism;Environmental Information Processing	Global and overview maps;Metabolism of terpenoids and polyketides;Global and overview maps;Signal transduction	Lipids and lipid-like molecules	Prenol lipids	247.132	M+H-H2O, M+H, M+H-2H2O	C15H20O4	3.5829	0.00789171	68.9	-	-3.24255	7773-56-0	Sesquiterpenoids
Rutin	metab_101	map01100;map01110;map00944	Metabolic pathways; Biosynthesis of secondary metabolites; Flavone and flavonol biosynthesis	C05625	LMPK12112098;HMDB0003249	pos	-	-	Metabolism;Metabolism;Metabolism	Global and overview maps;Global and overview maps;Biosynthesis of other secondary metabolites	Phenylpropanoids and polyketides	Flavonoids	633.14	M+Na, M+K, M+H	C27H30O16	3.5171	0.0108337	80.4	-	-4.48047	153-18-4	Flavonoid glycosides
CDP-DG(16:1(9Z)/22:5(7Z,10Z,13Z,16Z,19Z))	metab_113	-	-	-	HMDB0115955	pos	-	-	-	-	Lipids and lipid-like molecules	Glycerophospholipids	513.764	M+2H, M+2Na, M+2Na+H	C50H81N3O15P2	4.46	0.00787715	-	34	-0.615537	-	CDP-glycerols
P-Tolualdehyde	metab_124	map01100	Metabolic pathways	C06758	-	pos	-	-	Metabolism	Global and overview maps	-	-	121.065	M+H, M+ACN+H, M+H-H2O	C8H8O	6.3351	0.00272818	75.6	-	-1.29021	-	-
5E,7Z-Dodecadienal	metab_126	-	-	-	LMFA06000157	pos	-	-	-	-	-	-	198.185	M+H-H2O, M+H, M+NH4	C12H20O	5.7926	0.00339944	35.1	-	-3.50921	-	-
(E)-2-Hexenyl (E)-7,9-decadienoate	metab_127	-	-	-	LMFA07010584	pos	-	-	-	-	-	-	251.2	M+H-H2O, M+H, M+H-2H2O	C16H26O2	7.4354	0.00556718	34.2	-	-3.74215	-	-
(±)-Naringenin	metab_130	-	-	-	-	pos	-	-	-	-	-	-	273.075	M+H, 2M+Na, M+H-H2O	C15H12O5	5.1404	0.00736985	85.2	-	-4.51199	-	-
9,12-Octadecadiynoic Acid	metab_134	-	-	-	LMFA01030540	pos	-	-	-	-	-	-	277.215	M+H-H2O, M+H, M+H-2H2O	C18H28O2	8.3388	0.0124095	43.7	-	-3.73866	-	-
Linoleic acid	metab_136	map01100;map00591;map01040	Metabolic pathways; Linoleic acid metabolism; Biosynthesis of unsaturated fatty acids	C01595	LMFA01030120;HMDB0000673	pos	Lipids	Fatty acids	Metabolism;Metabolism;Metabolism	Global and overview maps;Lipid metabolism;Lipid metabolism	Lipids and lipid-like molecules	Fatty Acyls	263.236	M+H-H2O, M+H, M+H-2H2O	C18H32O2	8.5542	0.0203722	39.9	-	-3.80075	60-33-3	Lineolic acids and derivatives
7Z,11Z,13E-Hexadecatrienal	metab_137	-	-	-	LMFA06000226	pos	-	-	-	-	-	-	235.205	M+H, M+NH4, M+H-H2O	C16H26O	8.7048	0.0228458	30.2	-	-3.93306	-	-
PE(16:0/0:0)	metab_140	-	-	-	LMGP02050002	pos	-	-	-	-	-	-	454.291	M+H, M+Na, M+H-H2O	C21H44NO7P	9.0064	0.00443695	78.5	-	-4.08637	-	-
6-[5]-ladderane-1-hexanol	metab_141	-	-	-	LMFA05000063	pos	-	-	-	-	-	-	261.22	M+H, M+NH4, M+H-H2O	C18H28O	8.9849	0.013407	56.2	-	-3.99232	-	-
Farnesyl acetone	metab_145	-	-	-	-	pos	-	-	-	-	-	-	280.262	M+H, M+NH4, M+H-H2O	C18H30O	9.3913	0.0158313	83.8	-	-4.18808	-	-
Longicamphenylone	metab_146	-	-	-	-	pos	-	-	-	-	-	-	224.2	M+H-H2O, M+NH4, M+H	C14H22O	9.3913	0.00858755	86.8	-	-3.51055	-	-
2E,6E-Octadienal	metab_147	-	-	-	LMFA06000131	pos	-	-	-	-	-	-	142.122	M+H, M+NH4, M+H-H2O	C8H12O	9.7159	0.00538161	69.3	-	-1.90749	-	-
9,12,15-Octadecatrien-1-ol	metab_151	-	-	-	LMFA05000216	pos	-	-	-	-	-	-	282.278	M+H, M+NH4, M+H-H2O	C18H32O	9.7159	0.0207087	59.5	-	-4.21593	-	-
Quercetin 7-rutinoside	metab_154	-	-	-	LMPK12112203;HMDB0037934	pos	-	-	-	-	Phenylpropanoids and polyketides	Flavonoids	633.147	M+H-H2O, M+Na, M+NH4	C27H30O16	10.1516	0.0374163	-	42.4	8.09645	147714-62-3	Flavonoid glycosides
Diphthalate	metab_156	-	-	-	-	pos	-	-	-	-	-	-	413.264	M+Na, M+ACN+Na, M+H	C24H38O4	10.3237	0.0083032	32.8	-	-4.4669	-	-
3,7,11,15-Tetramethyl-6,10,14-hexadecatrien-1-ol	metab_157	-	-	-	LMFA05000210	pos	-	-	-	-	-	-	310.309	M+H, M+NH4, M+H-H2O	C20H36O	10.2163	0.0158758	45.7	-	-4.42693	-	-
Ambronide	metab_158	-	-	-	HMDB0036831	pos	-	-	-	-	Organoheterocyclic compounds	Naphthofurans	254.247	M+H-H2O, M+H, M+NH4	C16H28O	10.2163	0.00855196	-	34.9	-3.52839	6790-58-5	Not Available
PC(18:2(9Z,12Z)/18:3(9Z,12Z,15Z))	metab_162	-	-	-	HMDB0008141;LMGP01011626	pos	-	-	-	-	Lipids and lipid-like molecules	Glycerophospholipids	802.534	M+Na, M+K, M+H	C44H78NO8P	10.826	0.0191722	-	93.6	-2.40378	-	Glycerophosphocholines
PE(16:1(9Z)/20:4(5Z,8Z,11Z,14Z))	metab_163	-	-	-	HMDB0008970;LMGP02011217	pos	-	-	-	-	Lipids and lipid-like molecules	Glycerophospholipids	760.485	M+Na, M+2Na-H, M+H	C41H72NO8P	10.892	0.0191263	40.6	-	-4.72062	-	Glycerophosphoethanolamines
Glucocerebrosides	metab_164	-	-	-	-	pos	-	-	-	-	-	-	696.538	M+H-H2O, M+H, M+K	C40H75NO9	11.0681	0.0106584	71.4	-	-4.46231	-	-
PE(16:0/18:3(9Z,12Z,15Z))	metab_165	-	-	-	LMGP02010041;HMDB0008930	pos	-	-	-	-	Lipids and lipid-like molecules	Glycerophospholipids	736.486	M+Na, M+2Na-H, M+H	C39H72NO8P	11.1783	0.0185562	40.5	-	-4.51026	-	Glycerophosphoethanolamines
1-Palmitoyl-2-linoleoyl PE	metab_166	-	-	-	-	pos	-	-	-	-	-	-	738.501	M+Na, M+2Na-H, M+H	C39H74NO8P	11.4866	0.019951	94.7	-	-4.77158	-	-
DG(16:0/18:3(9Z,12Z,15Z)/0:0)	metab_168	-	-	-	HMDB0007105	pos	-	-	-	-	Lipids and lipid-like molecules	Fatty Acyls	613.478	M+H-H2O, M+H, M+Na	C37H66O5	11.7724	0.0165269	-	35.5	-3.90476	-	Lineolic acids and derivatives
PA(18:4(6Z,9Z,12Z,15Z)/20:4(5Z,8Z,11Z,14Z))	metab_169	-	-	-	HMDB0115042;LMGP10010446	pos	-	-	-	-	Lipids and lipid-like molecules	Glycerophospholipids	717.443	M+H, M+2Na-H, M+Na	C41H65O8P	12.5378	0.0131659	33.4	-	-8.28484	-	Glycerophosphates
PC(16:0/18:2(9Z,12Z))	metab_170	-	-	-	HMDB0007973;LMGP01010594	pos	-	-	-	-	Lipids and lipid-like molecules	Glycerophospholipids	780.548	M+Na, M+K, M+H	C42H80NO8P	11.4645	0.0245004	-	94.4	-4.9312	-	Glycerophosphocholines
PA(14:0/22:6(4Z,7Z,10Z,13Z,16Z,19Z))	metab_171	-	-	-	LMGP10010922;HMDB0114792	pos	-	-	-	-	Lipids and lipid-like molecules	Glycerophospholipids	693.443	M+H, M+2Na-H, M+Na	C39H65O8P	13.2834	0.0142576	31.7	-	-7.92471	-	Glycerophosphates
PA(18:1(11Z)/18:3(9Z,12Z,15Z))	metab_185	-	-	-	HMDB0114904	pos	-	-	-	-	Lipids and lipid-like molecules	Glycerophospholipids	719.459	M+H, M+2Na-H, M+Na	C39H69O8P	13.1517	0.0221397	-	79.1	-5.33269	-	Glycerophosphates
PA(16:0/20:5(5Z,8Z,11Z,14Z,17Z))	metab_189	-	-	-	LMGP10010904;HMDB0114842	pos	-	-	-	-	Lipids and lipid-like molecules	Glycerophospholipids	695.459	M+H, M+2Na-H, M+Na	C39H67O8P	14.1141	0.0117095	31.9	-	-7.94511	-	Glycerophosphates
PC(18:1(11Z)/18:3(6Z,9Z,12Z))	metab_194	-	-	-	LMGP01012150;HMDB0008073	pos	-	-	-	-	Lipids and lipid-like molecules	Glycerophospholipids	804.547	M+Na, M+K, M+H	C44H80NO8P	11.0905	0.011782	-	70.4	-5.74189	-	Glycerophosphocholines
Muricatenol	metab_196	-	-	-	HMDB0035900	pos	-	-	-	-	Lipids and lipid-like molecules	Fatty Acyls	591.496	M+H-2H2O, M+Na, M+H-H2O	C37H68O6	10.936	0.0755144	-	68.2	-3.62945	-	Fatty alcohols
PE(18:3(6Z,9Z,12Z)/18:3(9Z,12Z,15Z))	metab_199	-	-	-	LMGP02010694;HMDB0009128	pos	-	-	-	-	Lipids and lipid-like molecules	Glycerophospholipids	758.47	M+Na, M+2Na-H, M+H	C41H70NO8P	10.6724	0.0436275	-	79.3	-4.8208	-	Glycerophosphoethanolamines
3-(5,6,6-Trimethylbicyclo[2.2.1]hept-1-yl)cyclohexanol	metab_201	-	-	-	HMDB0031851	pos	-	-	-	-	Lipids and lipid-like molecules	Prenol lipids	254.247	M+H, M+NH4, M+H-H2O	C16H28O	10.6508	0.00443476	-	41.9	-4.07533	3407-42-9	Monoterpenoids
Rosifoliol	metab_205	-	-	-	HMDB0035868	pos	-	-	-	-	Lipids and lipid-like molecules	Prenol lipids	240.231	M+H-H2O, M+H, M+NH4	C15H26O	10.2163	0.00649741	48	-	-3.31596	63891-61-2	Sesquiterpenoids
Nerolidol	metab_207	map01100;map00909	Metabolic pathways; Sesquiterpenoid and triterpenoid biosynthesis	C09704	LMPR0103010005;HMDB0035662	pos	-	-	Metabolism;Metabolism	Global and overview maps;Metabolism of terpenoids and polyketides	Lipids and lipid-like molecules	Prenol lipids	240.231	M+H-H2O, M+NH4, M+H	C15H26O	9.7159	0.00424446	61.8	-	-3.4268	7212-44-4	Sesquiterpenoids
5,8-tetradecadienal	metab_208	-	-	-	LMFA06000082	pos	-	-	-	-	-	-	226.216	M+H-H2O, M+NH4, M+H	C14H24O	9.7159	0.00472912	49	-	-3.63678	-	-
6,10-Dimethyl-5(E),9-undecadien-2-one	metab_209	-	-	-	LMFA11000696	pos	-	-	-	-	-	-	212.2	M+H-H2O, M+H, M+NH4	C13H22O	9.7159	0.0104023	76.4	-	-3.39306	-	-
8E,10E-Dodecadienal	metab_210	-	-	-	LMFA06000155	pos	-	-	-	-	-	-	198.184	M+H-H2O, M+H, M+NH4	C12H20O	9.7159	0.00523525	63.3	-	-3.53832	-	-
2,6,6-Trimethyl-1-cyclohexen-1-acetaldehyde	metab_211	-	-	-	HMDB0032540	pos	-	-	-	-	Organic oxygen compounds	Organooxygen compounds	184.169	M+H-H2O, M+H, M+NH4	C11H18O	9.7159	0.00582632	51.3	-	-3.02808	472-66-2	Carbonyl compounds
(1R,4R)-Dihydrocarvone	metab_212	map00903	Limonene and pinene degradation	C11398	LMPR0102090033	pos	-	-	Metabolism	Metabolism of terpenoids and polyketides	-	-	170.153	M+H-H2O, M+NH4, M+H	C10H16O	9.7159	0.0042944	86.8	-	-2.82831	-	-
5-Isopropylbicyclo[3.1.0]hexan-2-one	metab_213	-	-	-	HMDB0035229	pos	-	-	-	-	Organic oxygen compounds	Organooxygen compounds	156.138	M+H-H2O, M+NH4, M+H	C9H14O	9.7159	0.00440453	66.9	-	-1.15063	513-20-2	Carbonyl compounds
3-Methyl-2-cyclohexen-1-one	metab_214	-	-	-	HMDB0031541	pos	-	-	-	-	Organic oxygen compounds	Organooxygen compounds	128.107	M+H, M+NH4, M+H-H2O	C7H10O	9.7159	0.00593538	59.9	-	0.164124	1193-18-6	Carbonyl compounds
5-Nonen-2-one	metab_215	-	-	-	LMFA12000141;HMDB0034761	pos	-	-	-	-	Organic oxygen compounds	Organooxygen compounds	123.117	M+H-H2O, M+CH3OH+H, M+H	C9H16O	9.7159	0.00455239	-	60.1	-1.408	27039-84-5	Carbonyl compounds
3,6,8-dodecatrien-1-ol	metab_218	-	-	-	LMFA05000058	pos	-	-	-	-	-	-	198.184	M+H-H2O, M+H, M+NH4	C12H20O	9.3913	0.00501364	59.9	-	-3.554	-	-
4-(4-Methyl-3-pentenyl)-3-cyclohexene-1-carboxaldehyde	metab_221	-	-	-	HMDB0031733	pos	-	-	-	-	Lipids and lipid-like molecules	Prenol lipids	175.148	M+H-H2O, M+NH4, M+H	C13H20O	9.3913	0.00805619	77.9	-	-3.24722	37677-14-8	Monoterpenoids
3E,7Z-Decadien-2-one	metab_222	-	-	-	LMFA12000151	pos	-	-	-	-	-	-	170.153	M+H-H2O, M+H, M+NH4	C10H16O	9.3913	0.00676897	81.3	-	-2.7719	-	-
Geijerone	metab_223	-	-	-	HMDB0038194	pos	-	-	-	-	Lipids and lipid-like molecules	Prenol lipids	161.132	M+H-H2O, M+H, M+NH4	C12H18O	9.3913	0.00684955	47.3	-	-3.40468	41411-01-2	Monoterpenoids
Norbicycloekasantalal	metab_224	-	-	-	HMDB0036719	pos	-	-	-	-	Lipids and lipid-like molecules	Prenol lipids	147.116	M+H-H2O, M+H, M+NH4	C11H16O	9.3913	0.00633585	58.4	-	-3.36137	37720-84-6	Monoterpenoids
Perillyl aldehyde	metab_226	map00903	Limonene and pinene degradation	C02576	HMDB0003647;LMPR0102090010	pos	-	-	Metabolism	Metabolism of terpenoids and polyketides	Lipids and lipid-like molecules	Prenol lipids	133.101	M+H-H2O, M+NH4, M+H	C10H14O	9.3913	0.00854275	62.6	-	-2.54455	2111-75-3	Monoterpenoids
5-Methyl-5-hexen-2-one	metab_229	-	-	-	HMDB0031551	pos	-	-	-	-	Organic oxygen compounds	Organooxygen compounds	95.0858	M+H-H2O, M+ACN+H, M+H	C7H12O	9.3913	0.0107607	59.4	-	2.40983	3240-09-03	Carbonyl compounds
4-Methyl-2-pentenal	metab_230	-	-	-	HMDB0031196	pos	-	-	-	-	Organic oxygen compounds	Organooxygen compounds	81.0704	M+H-H2O, M+ACN+H, M+H	C6H10O	9.3913	0.00480916	31.1	-	4.90809	5362-56-1	Carbonyl compounds
Longifolenaldehyde	metab_231	-	-	-	-	pos	-	-	-	-	-	-	238.216	M+H-H2O, M+NH4, M+H	C15H24O	9.3706	0.00450356	57.4	-	-3.32531	-	-
Glutaric acid	metab_238	map01100;map00310;map00071	Metabolic pathways; Lysine degradation; Fatty acid degradation	C00489	HMDB0000661	pos	Organic acids	Carboxylic acids	Metabolism;Metabolism;Metabolism	Global and overview maps;Amino acid metabolism;Lipid metabolism	Organic acids and derivatives	Carboxylic acids and derivatives	115.039	M+H-H2O, M+H, M+H-2H2O	C5H8O4	4.3773	0.00591713	58.6	-	-0.488343	110-94-1	Dicarboxylic acids and derivatives
Caffeic Acid	metab_240	map01100;map00940;map01110	Metabolic pathways; Phenylpropanoid biosynthesis; Biosynthesis of secondary metabolites	C01197;C01481	HMDB0001964	pos	-	-	Metabolism;Metabolism;Metabolism	Global and overview maps;Biosynthesis of other secondary metabolites;Global and overview maps	Phenylpropanoids and polyketides	Cinnamic acids and derivatives	163.038	M+H-H2O, M+H, M+H-2H2O	C9H8O4	2.6335	0.00517041	83.1	-	-3.38478	331-39-5	Hydroxycinnamic acids and derivatives
3-amino-2-naphthoic acid	metab_242	-	-	-	-	pos	-	-	-	-	-	-	188.07	M+H, M+NH4, M+H-H2O	C11H9NO2	2.4005	0.00431856	33.6	-	-3.85761	-	-
Dechloro-Honaucin A	metab_253	-	-	-	-	pos	-	-	-	-	-	-	171.065	M+H, M+2Na-H, M+NH4	C8H10O4	1.3827	0.0100241	31.7	-	-3.75296	-	-
N-(1-Deoxy-1-fructosyl)glycine	metab_255	-	-	-	HMDB0037848	pos	-	-	-	-	Organic oxygen compounds	Organooxygen compounds	220.081	M+H-H2O, M+H, M+H-2H2O	C8H15NO7	1.3827	0.0143877	-	56.4	-3.51118	60644-20-4	Carbohydrates and carbohydrate conjugates
Phenylacetaldehyde	metab_260	map01100;map00360	Metabolic pathways; Phenylalanine metabolism	C00601	HMDB0006236	pos	-	-	Metabolism;Metabolism	Global and overview maps;Amino acid metabolism	Benzenoids	Benzene and substituted derivatives	121.065	M+H, M+NH4, M+H-H2O	C8H8O	1.3827	0.0143336	64.8	-	-1.10686	122-78-1	Phenylacetaldehydes
Tetrahydrodipicolinate	metab_261	map01100;map01110;map00300;map01230;map00261	Metabolic pathways; Biosynthesis of secondary metabolites; Lysine biosynthesis; Biosynthesis of amino acids; Monobactam biosynthesis	C03972	HMDB0012289	pos	-	-	Metabolism;Metabolism;Metabolism;Metabolism;Metabolism	Global and overview maps;Global and overview maps;Amino acid metabolism;Global and overview maps;Biosynthesis of other secondary metabolites	Organic acids and derivatives	Carboxylic acids and derivatives	204.086	M+H-2H2O, M+H-H2O, M+CH3OH+H	C7H9NO4	1.3635	0.0127934	-	51.6	-2.04778	2353-17-5	Amino acids, peptides, and analogues
2-Hydroxycinnamic acid	metab_271	map01100;map00940;map01110;map00360	Metabolic pathways; Phenylpropanoid biosynthesis; Biosynthesis of secondary metabolites; Phenylalanine metabolism	C01772	HMDB0002641	pos	-	-	Metabolism;Metabolism;Metabolism;Metabolism	Global and overview maps;Biosynthesis of other secondary metabolites;Global and overview maps;Amino acid metabolism	Phenylpropanoids and polyketides	Cinnamic acids and derivatives	165.054	M+H, M+NH4, M+H-H2O	C9H8O3	1.6323	0.0179955	72.7	-	-3.36823	583-17-5	Hydroxycinnamic acids and derivatives
2-Aminoheptanedioic acid	metab_299	-	-	-	HMDB0034252	pos	-	-	-	-	Organic acids and derivatives	Carboxylic acids and derivatives	176.091	M+H-2H2O, M+H	C7H13NO4	1.2657	0.0075703	48.2	-	-3.08685	3721-85-5	Amino acids, peptides, and analogues
2-Aminobut-2-enoate	metab_303	-	-	C17234	-	pos	-	-	-	-	-	-	84.0448	M+H-H2O, M+H	C4H7NO2	1.2855	0.00500591	80.4	-	4.35659	-	-
2-Aminomuconic acid semialdehyde	metab_305	map01100;map00380	Metabolic pathways; Tryptophan metabolism	C03824	LMFA01060191;HMDB0001280	pos	-	-	Metabolism;Metabolism	Global and overview maps;Amino acid metabolism	Organic acids and derivatives	Carboxylic acids and derivatives	124.039	M+H-H2O, M+CH3OH+H	C6H7NO3	1.3236	0.0101135	-	31.6	-1.51503	245128-91-0	Amino acids, peptides, and analogues
N-Acetyl-L-glutamate 5-semialdehyde	metab_316	map01100;map00220;map01110;map01210;map00330;map01230	Metabolic pathways; Arginine biosynthesis; Biosynthesis of secondary metabolites; 2-Oxocarboxylic acid metabolism; Arginine and proline metabolism; Biosynthesis of amino acids	C01250	HMDB0006488	pos	-	-	Metabolism;Metabolism;Metabolism;Metabolism;Metabolism;Metabolism	Global and overview maps;Amino acid metabolism;Global and overview maps;Global and overview maps;Amino acid metabolism;Global and overview maps	Organic acids and derivatives	Carboxylic acids and derivatives	138.054	M+H-2H2O, M+NH4	C7H11NO4	1.305	0.00963131	-	51.9	-2.81303	13074-21-0	Amino acids, peptides, and analogues
Methylpyrazine	metab_343	-	-	-	HMDB0033112	pos	-	-	-	-	Organoheterocyclic compounds	Diazines	95.0607	M+H, M+NH4	C5H6N2	1.1642	0.00618569	44.8	-	3.0504	109-08-0	Pyrazines
D-Pipecolic acid	metab_358	-	-	-	HMDB0005960	pos	-	-	-	-	Organic acids and derivatives	Carboxylic acids and derivatives	130.086	M+H, M+K	C6H11NO2	1.2057	0.0113518	62.7	-	-2.70027	1723-00-8	Amino acids, peptides, and analogues
3-Indoleacetic Acid	metab_363	map01100;map00380;map04075	Metabolic pathways; Tryptophan metabolism; Plant hormone signal transduction	C00954	-	pos	-	-	Metabolism;Metabolism;Environmental Information Processing	Global and overview maps;Amino acid metabolism;Signal transduction	-	-	176.07	M+H, M+NH4	C10H9NO2	1.9613	0.00436434	60.7	-	-3.24788	-	-
2-(4-Methyl-5-thiazolyl)ethyl formate	metab_367	-	-	-	HMDB0032420	pos	-	-	-	-	Organoheterocyclic compounds	Azoles	204.065	M+H-2H2O, M+CH3OH+H	C7H9NO2S	2.0278	0.0175991	-	41.3	-2.21749	90731-56-9	Thiazoles
3D-(3,5/4)-Trihydroxycyclohexane-1,2-dione	metab_374	-	-	-	-	pos	-	-	-	-	-	-	143.033	M+H-H2O, M+H	C6H8O5	2.0719	0.00675402	37.9	-	-2.63407	-	-
2-hydroxy-3-methyl-2-Cyclopenten-1-one	metab_382	-	-	-	-	pos	-	-	-	-	-	-	113.06	M+H-2H2O, M+H	C6H8O2	2.137	0.0200618	46.1	-	3.26539	-	-
Cis-zeatin-9-N-glucoside	metab_387	-	-	-	HMDB0012202	pos	-	-	-	-	Organic oxygen compounds	Organooxygen compounds	404.151	M+Na, M+K	C16H23N5O6	2.1591	0.0176856	-	65.6	-8.0849	-	Carbohydrates and carbohydrate conjugates
4-hydroxy-5-(3-methoxyphenyl)pentanoic acid	metab_405	-	-	-	HMDB0127765	pos	-	-	-	-	-	-	207.101	M+H-H2O, M+H	C12H16O4	2.3141	0.00469215	-	36.6	-3.17389	-	-
Methyl (3x,10R)-dihydroxy-11-dodecene-6,8-diynoate 10-glucoside	metab_406	-	-	-	HMDB0040896	pos	-	-	-	-	Lipids and lipid-like molecules	Fatty Acyls	443.131	M+CH3OH+H, M+2Na-H	C19H26O9	2.3141	0.0477545	-	30.2	-9.79796	152141-43-0	Fatty acyl glycosides
4-Chlorobenzaldehyde	metab_415	-	-	C06648	-	pos	-	-	-	-	-	-	141.01	M+H, M+ACN+H	C7H5ClO	2.4433	0.0037088	57.4	-	-3.79642	-	-
(±)Abscisic Acid	metab_417	-	-	-	-	pos	-	-	-	-	-	-	265.142	M+H-H2O, M+H	C15H20O4	2.4829	0.032463	46.5	-	-3.73043	-	-
6-Methylquinoline	metab_418	-	-	-	HMDB0033115	pos	-	-	-	-	Organoheterocyclic compounds	Quinolines and derivatives	144.08	M+H, M+NH4	C10H9N	2.4829	0.0265404	50.9	-	-3.4959	91-62-3	Not Available
Cynaroside A	metab_421	-	-	-	HMDB0040532	pos	-	-	-	-	Lipids and lipid-like molecules	Prenol lipids	467.187	M+Na, M+K	C21H32O10	2.463	0.00504677	-	53.9	-4.11337	117804-06-5	Terpene lactones
Phenylpyruvic acid	metab_429	map01100;map01110;map01210;map00960;map01230;map00360;map00400	Metabolic pathways; Biosynthesis of secondary metabolites; 2-Oxocarboxylic acid metabolism; Tropane, piperidine and pyridine alkaloid biosynthesis; Biosynthesis of amino acids; Phenylalanine metabolism; Phenylalanine, tyrosine and tryptophan biosynthesis	C00166	HMDB0000205	pos	-	-	Metabolism;Metabolism;Metabolism;Metabolism;Metabolism;Metabolism;Metabolism	Global and overview maps;Global and overview maps;Global and overview maps;Biosynthesis of other secondary metabolites;Global and overview maps;Amino acid metabolism;Amino acid metabolism	Benzenoids	Benzene and substituted derivatives	147.044	M+H-H2O, M+Na	C9H8O3	2.6988	0.00857363	-	40.3	-3.04912	156-06-9	Phenylpyruvic acid derivatives
Cuminaldehyde	metab_431	map01100	Metabolic pathways	C06577	HMDB0002214	pos	-	-	Metabolism	Global and overview maps	Lipids and lipid-like molecules	Prenol lipids	131.085	M+H-H2O, M+H	C10H12O	2.721	0.00741666	43.6	-	-2.11329	122-03-2	Monoterpenoids
(3,4,5,6-tetrahydroxyoxan-2-yl)methyl 3-(4-hydroxy-3-methoxyphenyl)prop-2-enoate	metab_435	-	-	-	HMDB0125101	pos	-	-	-	-	-	-	379.098	M+Na, M+K	C16H20O9	2.7649	0.0283316	-	40.8	-4.51014	-	-
(E)-1-Cinnamoylpyrrolidine	metab_449	-	-	-	HMDB0038835	pos	-	-	-	-	Phenylpropanoids and polyketides	Cinnamic acids and derivatives	202.122	M+H, M+NH4	C13H15NO	3.0966	0.0389408	32.6	-	-3.56838	52438-21-8	Not Available
Flavanone base + 6O	metab_452	-	-	-	-	pos	-	-	-	-	-	-	303.049	M+H-H2O, 2M+3H2O+2H	C15H12O8	3.1853	0.00552346	49	-	-3.88218	-	-
Kaempferol 3-(2G-apiosylrobinobioside)	metab_464	-	-	-	HMDB0039759	pos	-	-	-	-	Phenylpropanoids and polyketides	Flavonoids	749.187	M+H, M+Na	C32H38O19	3.4291	0.0179154	-	46.6	-4.88765	132185-73-0	Flavonoid glycosides
(S)-(-)-Perillyl alcohol	metab_467	map01110;map00903;map00902	Biosynthesis of secondary metabolites; Limonene and pinene degradation; Monoterpenoid biosynthesis	C02452	-	pos	-	-	Metabolism;Metabolism;Metabolism	Global and overview maps;Metabolism of terpenoids and polyketides;Metabolism of terpenoids and polyketides	-	-	135.116	M+H-H2O, M+H	C10H16O	3.4513	0.00919144	62.9	-	-2.60733	-	-
Neocnidilide	metab_468	-	-	C17002	HMDB0034450	pos	-	-	-	-	Organoheterocyclic compounds	Isobenzofurans	195.137	M+H, M+NH4	C12H18O2	3.473	0.0268305	31.2	-	-3.40607	4567-33-3	Not Available
N-cis-Caffeoyltyramine	metab_470	-	-	-	HMDB0033026	pos	-	-	-	-	Phenylpropanoids and polyketides	Cinnamic acids and derivatives	282.111	M+H-H2O, M+Na	C17H17NO4	3.4952	0.0228945	-	68.7	-3.6138	219773-48-5	Hydroxycinnamic acids and derivatives
Quercetin	metab_472	map01100;map00941;map01110;map00944	Metabolic pathways; Flavonoid biosynthesis; Biosynthesis of secondary metabolites; Flavone and flavonol biosynthesis	C00389	HMDB0005794;LMPK12110004	pos	-	-	Metabolism;Metabolism;Metabolism;Metabolism	Global and overview maps;Biosynthesis of other secondary metabolites;Global and overview maps;Biosynthesis of other secondary metabolites	Phenylpropanoids and polyketides	Flavonoids	303.049	M+H, 2M+3H2O+2H	C15H10O7	3.5171	0.00648158	79.9	-	-4.35119	117-39-5	Flavones
Demethylwedelolactone	metab_473	-	-	-	LMPK12090041	pos	-	-	-	-	-	-	301.033	M+H, 2M+ACN+Na	C15H8O7	3.5389	0.0273863	40.1	-	-4.00605	-	-
11,13-Dihydrotaraxinic acid glucosyl ester	metab_477	-	-	-	HMDB0035867	pos	-	-	-	-	Lipids and lipid-like molecules	Saccharolipids	449.176	M+Na, M+K	C21H30O9	3.5829	0.0158811	-	56.7	-4.21737	75911-16-9	Not Available
(R)-Pterosin B	metab_479	-	-	-	HMDB0030759	pos	-	-	-	-	Benzenoids	Indanes	201.127	M+H-H2O, M+H	C14H18O2	3.5829	0.0278064	-	33.8	-3.4449	34175-96-7	Indanones
Astragalin	metab_499	map01110;map00944	Biosynthesis of secondary metabolites; Flavone and flavonol biosynthesis	C12249	HMDB0037429;LMPK12111725	pos	-	-	Metabolism;Metabolism	Global and overview maps;Biosynthesis of other secondary metabolites	Phenylpropanoids and polyketides	Flavonoids	449.106	M+H, M+K	C21H20O11	3.8484	0.00897602	97.5	-	-4.07444	480-10-4	Flavonoid glycosides
(23R)-Acetoxytomatine	metab_515	-	-	-	HMDB0034485	pos	-	-	-	-	Lipids and lipid-like molecules	Steroids and steroid derivatives	557.772	M+H+Na, M+2Na	C52H85NO23	4.2468	0.0190921	-	56.8	-4.30173	176181-33-2	Steroidal glycosides
Tuliposide B	metab_520	-	-	C08570	-	pos	-	-	-	-	-	-	295.101	M+H, M+H-H2O	C11H18O9	4.3773	0.0266645	38.2	-	-3.59987	-	-
25-Hydroxyvitamin D3-26,23-lactone	metab_527	-	-	-	HMDB0060126	pos	-	-	-	-	Lipids and lipid-like molecules	Steroids and steroid derivatives	429.298	M+H-H2O, M+H	C27H40O4	4.46	0.00917839	-	53.8	-3.95773	-	Vitamin D and derivatives
Phlorin	metab_528	-	-	-	HMDB0035589	pos	-	-	-	-	Organic oxygen compounds	Organooxygen compounds	289.091	M+H-H2O, M+H	C12H16O8	4.3773	0.014932	38.7	-	-4.07275	28217-60-9	Carbohydrates and carbohydrate conjugates
C16 Sphinganine	metab_558	-	-	-	LMSP01040001	pos	-	-	-	-	-	-	274.273	M+H, M+Na	C16H35NO2	6.1849	0.00779247	75.6	-	-4.66582	-	-
Mevaldate	metab_560	-	-	C00772	-	pos	-	-	-	-	-	-	147.065	M+H-H2O, M+H	C6H10O4	6.3351	0.00454414	60.5	-	-2.15606	-	-
Dihydroactinidiolide	metab_575	-	-	-	HMDB0035240	pos	-	-	-	-	Organoheterocyclic compounds	Benzofurans	181.122	M+H-H2O, M+H	C11H16O2	6.9161	0.00490932	53.9	-	-3.47216	15356-74-8	Not Available
2,5-Dimethylbenzaldehyde	metab_578	-	-	-	-	pos	-	-	-	-	-	-	135.08	M+H-H2O, M+H	C9H10O	6.9592	0.00699991	90.2	-	-0.626051	-	-
13-Hydroxyabscisic acid	metab_582	-	-	-	HMDB0036095	pos	-	-	-	-	Lipids and lipid-like molecules	Prenol lipids	281.137	M+H-H2O, M+H	C15H20O5	6.9592	0.00675584	-	39.9	-3.84311	25841-53-6	Sesquiterpenoids
P-Coumaric acid	metab_588	map01100;map01110;map00130;map00998;map00950;map00940;map00350	Metabolic pathways; Biosynthesis of secondary metabolites; Ubiquinone and other terpenoid-quinone biosynthesis; Biosynthesis of various secondary metabolites - part 2; Isoquinoline alkaloid biosynthesis; Phenylpropanoid biosynthesis; Tyrosine metabolism	C00811	-	pos	-	-	Metabolism;Metabolism;Metabolism;Metabolism;Metabolism;Metabolism;Metabolism	Global and overview maps;Global and overview maps;Metabolism of cofactors and vitamins;Biosynthesis of other secondary metabolites;Biosynthesis of other secondary metabolites;Biosynthesis of other secondary metabolites;Amino acid metabolism	-	-	147.044	M+H-H2O, M+H	C9H8O3	7.4354	0.00477916	66.3	-	-3.29466	-	-
3-(5-Methyl-2-furyl)prop-2-enal	metab_595	-	-	-	HMDB0032400	pos	-	-	-	-	Organoheterocyclic compounds	Heteroaromatic compounds	119.049	M+H-H2O, M+H	C8H8O2	6.3351	0.0207096	-	31.1	-1.24167	5555-90-8	Not Available
LysoPC(18:3(9Z,12Z,15Z))	metab_596	-	-	-	HMDB0010388	pos	-	-	-	-	Lipids and lipid-like molecules	Glycerophospholipids	518.322	M+H, M+Na	C26H48NO7P	7.9092	0.00950042	48.6	-	-3.74408	-	Glycerophosphocholines
LysoPE(18:3(9Z,12Z,15Z)/0:0)	metab_600	-	-	-	HMDB0011509	pos	-	-	-	-	Lipids and lipid-like molecules	Glycerophospholipids	476.275	M+H, M+Na	C23H42NO7P	8.0397	0.00970068	35.9	-	-3.94914	-	Glycerophosphoethanolamines
MG(18:3(6Z,9Z,12Z)/0:0/0:0)	metab_606	-	-	-	HMDB0011569	pos	-	-	-	-	Lipids and lipid-like molecules	Fatty Acyls	353.267	M+H-H2O, M+H	C21H36O4	8.3171	0.0244433	59.7	-	-4.45764	-	Lineolic acids and derivatives
Xanthorrhizol	metab_607	-	-	-	HMDB0038195	pos	-	-	-	-	Lipids and lipid-like molecules	Prenol lipids	219.173	M+H, M+CH3OH+H	C15H22O	8.4676	0.0111409	55.5	-	-3.93525	30199-26-9	Sesquiterpenoids
Serratol	metab_613	-	-	-	HMDB0039827	pos	-	-	-	-	Lipids and lipid-like molecules	Prenol lipids	308.293	M+H, M+NH4	C20H34O	8.6187	0.0230783	-	30.3	-4.5187	67814-27-1	Diterpenoids
Acetyl tributyl citrate	metab_614	-	-	-	HMDB0034159	pos	-	-	-	-	Organic acids and derivatives	Carboxylic acids and derivatives	425.213	M+Na, M+K	C20H34O8	8.5542	0.0097107	-	58.6	-4.71715	77-90-7	Tetracarboxylic acids and derivatives
Farnesyl pyrophosphate	metab_618	map01100;map01110;map00909;map00906;map00900;map00100	Metabolic pathways; Biosynthesis of secondary metabolites; Sesquiterpenoid and triterpenoid biosynthesis; Carotenoid biosynthesis; Terpenoid backbone biosynthesis; Steroid biosynthesis	C00448	HMDB0000961;LMPR0103010002	pos	-	-	Metabolism;Metabolism;Metabolism;Metabolism;Metabolism;Metabolism	Global and overview maps;Global and overview maps;Metabolism of terpenoids and polyketides;Metabolism of terpenoids and polyketides;Metabolism of terpenoids and polyketides;Lipid metabolism	Lipids and lipid-like molecules	Prenol lipids	383.139	M+H, M+Na	C15H28O7P2	8.7692	0.0114645	-	49.6	1.98495	13058-04-3	Sesquiterpenoids
Geranylgeraniol	metab_620	map00904;map01110	Diterpenoid biosynthesis; Biosynthesis of secondary metabolites	C09094	LMPR0104010009	pos	-	-	Metabolism;Metabolism	Metabolism of terpenoids and polyketides;Global and overview maps	-	-	308.293	M+H, M+NH4	C20H34O	9.8945	0.0270818	60.7	-	-4.69722	-	-
Beta-Ionone	metab_624	-	-	C12287	HMDB0036565	pos	-	-	-	-	Lipids and lipid-like molecules	Prenol lipids	193.158	M+H-H2O, M+H	C13H20O	9.9363	0.0149826	75	-	-3.17956	79-77-6	Sesquiterpenoids
Solerol	metab_642	-	-	-	HMDB0002173	pos	-	-	-	-	Organoheterocyclic compounds	Lactones	129.054	M+H-H2O, M+H	C6H10O4	10.3667	0.0139235	-	31.2	-1.9139	27610-27-1	Not Available
PA(18:2(9Z,12Z)/22:5(7Z,10Z,13Z,16Z,19Z))	metab_651	-	-	-	HMDB0114969	pos	-	-	-	-	Lipids and lipid-like molecules	Glycerophospholipids	769.483	M+NH4, M+Na	C43H71O8P	10.5191	0.0105874	-	55.8	5.70283	-	Glycerophosphates
3-beta-Hydroxy-4-beta-methyl-5-alpha-cholest-7-ene-4-alpha-carbaldehyde	metab_663	-	-	-	HMDB0059643	pos	-	-	-	-	Lipids and lipid-like molecules	Steroids and steroid derivatives	429.371	M+H-H2O, M+H	C29H48O2	10.9581	0.013298	-	38.4	-2.89155	-	Cholestane steroids
PC(16:0/18:3(9Z,12Z,15Z))	metab_665	-	-	-	LMGP01010601;HMDB0007975	pos	-	-	-	-	Lipids and lipid-like molecules	Glycerophospholipids	778.532	M+H, M+Na	C42H78NO8P	11.1129	0.0171812	-	92.3	-4.59941	-	Glycerophosphocholines
PE(16:1(9Z)/22:6(4Z,7Z,10Z,13Z,16Z,19Z))	metab_666	-	-	-	HMDB0008979;LMGP02011216	pos	-	-	-	-	Lipids and lipid-like molecules	Glycerophospholipids	762.501	M+H, M+Na	C43H72NO8P	11.1558	0.0190686	59.5	-	-7.88262	-	Glycerophosphoethanolamines
Apigenin 7-[rhamnosyl-(1->2)-galacturonide]	metab_678	-	-	-	HMDB0038847	pos	-	-	-	-	Phenylpropanoids and polyketides	Flavonoids	610.182	M+NH4, M+Na	C27H28O15	12.0363	0.00804893	-	38.8	8.35838	124167-97-1	Flavonoid glycosides
PC(18:1(9Z)/18:1(9Z))	metab_679	map01100;map00564;map01110;map00590;map00591;map00592	Metabolic pathways; Glycerophospholipid metabolism; Biosynthesis of secondary metabolites; Arachidonic acid metabolism; Linoleic acid metabolism; alpha-Linolenic acid metabolism	C00157	LMGP01010890;HMDB0000593	pos	Lipids	Phospholipids	Metabolism;Metabolism;Metabolism;Metabolism;Metabolism;Metabolism	Global and overview maps;Lipid metabolism;Global and overview maps;Lipid metabolism;Lipid metabolism;Lipid metabolism	Lipids and lipid-like molecules	Glycerophospholipids	808.578	M+H, M+Na	C44H84NO8P	12.0141	0.0271792	-	92.6	-5.12229	68737-67-7	Glycerophosphocholines
PC(18:0/18:3(9Z,12Z,15Z))	metab_684	-	-	-	HMDB0008041;LMGP01011589	pos	-	-	-	-	Lipids and lipid-like molecules	Glycerophospholipids	806.563	M+H, M+Na	C44H82NO8P	11.4866	0.0230332	-	68.1	-4.46988	-	Glycerophosphocholines
PI(18:2(9Z,12Z)/22:2(13Z,16Z))	metab_778	-	-	-	LMGP06010332;HMDB0009856	pos	-	-	-	-	Lipids and lipid-like molecules	Glycerophospholipids	937.582	M+NH4, M+Na	C49H87O13P	10.936	0.0578146	-	35.1	4.30875	-	Glycerophosphoinositols
PC(18:2(9Z,12Z)/18:4(6Z,9Z,12Z,15Z))	metab_791	-	-	-	LMGP01011627;HMDB0008142	pos	-	-	-	-	Lipids and lipid-like molecules	Glycerophospholipids	778.534	M+H, M+Na	C44H76NO8P	10.6075	0.0179692	-	82	-4.89278	-	Glycerophosphocholines
DG(18:3(6Z,9Z,12Z)/18:3(9Z,12Z,15Z)/0:0)	metab_794	-	-	-	HMDB0007279	pos	-	-	-	-	Lipids and lipid-like molecules	Fatty Acyls	613.48	M+H-H2O, M+H	C39H64O5	10.5637	0.0383646	40.9	-	-3.69113	-	Lineolic acids and derivatives
Octadecanamide	metab_804	-	-	C13846	HMDB0034146;LMFA08010003	pos	-	-	-	-	Organic acids and derivatives	Carboximidic acids and derivatives	284.294	M+H, M+ACN+H	C18H37NO	10.1736	0.0236089	-	45.1	-4.38145	124-26-5	Carboximidic acids
5-Isopropyl-2-(2-methylpropyl)-2-cyclohexen-1-one	metab_806	-	-	-	HMDB0038216	pos	-	-	-	-	Lipids and lipid-like molecules	Prenol lipids	212.2	M+H-H2O, M+NH4	C13H22O	10.2163	0.00898113	-	55.5	-3.01249	79862-15-0	Monoterpenoids
(Z,Z)-3,6-Dodecadien-1-ol	metab_814	-	-	-	HMDB0031102;LMFA05000573	pos	-	-	-	-	Lipids and lipid-like molecules	Fatty Acyls	165.163	M+H-H2O, M+H	C12H22O	9.7159	0.00226627	-	62.3	-3.13048	29125-78-8	Fatty alcohols
2-Undecenal	metab_815	-	-	-	LMFA06000065;HMDB0040247	pos	-	-	-	-	Organic oxygen compounds	Organooxygen compounds	151.148	M+H-H2O, M+H	C11H20O	9.7159	0.00421013	-	52.1	-3.15472	2463-77-6	Carbonyl compounds
Palmitic amide	metab_816	-	-	-	HMDB0012273	pos	-	-	-	-	Lipids and lipid-like molecules	Fatty Acyls	256.262	M+H, M+ACN+H	C16H33NO	9.5982	0.0114159	-	56.8	-4.5334	629-54-9	Fatty amides
(±)-Carvomenthol	metab_817	-	-	-	HMDB0037223	pos	-	-	-	-	Lipids and lipid-like molecules	Prenol lipids	139.148	M+H-H2O, M+H	C10H20O	9.7159	0.0307261	-	31.8	-3.23537	499-69-4	Monoterpenoids
(1R,2S,3S,4R)-p-Menthane-2,3-diol	metab_818	-	-	-	HMDB0035723	pos	-	-	-	-	Lipids and lipid-like molecules	Prenol lipids	137.132	M+H-2H2O, M+H-H2O	C10H20O2	9.7159	0.00681662	-	75.3	-2.75024	51745-21-2	Monoterpenoids
3-Methyl-2-cyclopenten-1-one	metab_820	-	-	-	HMDB0031546	pos	-	-	-	-	Organic oxygen compounds	Organooxygen compounds	114.091	M+H, M+NH4	C6H8O	9.7159	0.0134552	68.7	-	2.5963	2758-18-1	Carbonyl compounds
(3xi,5Z)-1,5-Octadien-3-ol	metab_822	-	-	-	HMDB0030966	pos	-	-	-	-	Lipids and lipid-like molecules	Fatty Acyls	109.101	M+H-H2O, M+H	C8H14O	9.7159	0.0167162	-	55.4	0.438272	50306-18-8	Fatty alcohols
2,5-Heptadien-1-ol	metab_824	-	-	-	HMDB0040339	pos	-	-	-	-	Lipids and lipid-like molecules	Fatty Acyls	95.0858	M+H-H2O, M+H	C7H12O	9.7159	0.00529678	-	61.3	2.42522	62237-90-5	Fatty alcohols
PC(16:0/0:0)[U]	metab_825	-	-	-	-	pos	-	-	-	-	-	-	496.338	M+H, M+Na	C24H50NO7P	8.8979	0.00260929	83.8	-	-3.98755	-	-
Humulol	metab_826	-	-	-	HMDB0038213	pos	-	-	-	-	Lipids and lipid-like molecules	Prenol lipids	240.231	M+H-H2O, M+NH4	C15H26O	8.9198	0.021007	-	49.5	-3.47705	24405-58-1	Sesquiterpenoids
6-Methyl-3-hepten-2-one, trans-	metab_836	-	-	-	HMDB0032403	pos	-	-	-	-	Organic oxygen compounds	Organooxygen compounds	109.101	M+H-H2O, M+H	C8H14O	9.3913	0.00281564	60.9	-	0.473917	20859-10-3	Carbonyl compounds
13,16,19-docosatrienoic acid	metab_837	-	-	C16534	LMFA01030407	pos	-	-	-	-	-	-	335.293	M+H, M+NH4	C22H38O2	9.2225	0.0109358	64.9	-	-4.53378	-	-
7-Methyl-3-octen-2-one	metab_839	-	-	-	HMDB0039461	pos	-	-	-	-	Organic oxygen compounds	Organooxygen compounds	123.117	M+H, M+H-H2O	C9H16O	9.3499	0.00765041	60.5	-	-3.78968	33046-81-0	Carbonyl compounds
4E,6E,10Z-Hexadecatrien-1-ol	metab_845	-	-	-	LMFA05000198	pos	-	-	-	-	-	-	254.247	M+H, M+NH4	C16H28O	9.0497	0.00977835	77	-	-4.11193	-	-
2-benzylheptanal	metab_849	-	-	-	HMDB0133154	pos	-	-	-	-	-	-	187.147	M+H-H2O, M+H	C14H20O	8.9849	0.0177275	-	45.3	-3.39819	-	-
6-Methoxymellein	metab_861	-	-	C02381	HMDB0038510	pos	-	-	-	-	Organoheterocyclic compounds	Benzopyrans	191.07	M+H-H2O, M+H	C11H12O4	8.0823	0.0201499	-	64.6	-3.65629	13410-15-6	2-benzopyrans
Collettiside I	metab_869	-	-	-	LMST01080092;HMDB0029310	pos	-	-	-	-	Lipids and lipid-like molecules	Steroids and steroid derivatives	594.398	M+H, M+NH4	C33H52O8	5.0535	0.0193771	-	59	-4.05693	14144-06-0	Steroidal glycosides
Glyceraldehyde	metab_877	-	-	C02154	HMDB0001051	pos	-	-	-	-	Organic oxygen compounds	Organooxygen compounds	73.029	M+H-H2O, M+H	C3H6O3	4.3773	0.0132019	36.8	-	6.17066	56-82-6	Carbohydrates and carbohydrate conjugates
Valenciachrome	metab_878	-	-	-	HMDB0036849	pos	-	-	-	-	Lipids and lipid-like molecules	Prenol lipids	413.303	M+H-H2O, M+H	C27H40O3	4.334	0.0163362	-	37.9	-3.26884	88853-51-4	Sesterterpenoids
3-Hydroxy-beta-ionone	metab_889	-	-	-	HMDB0036821	pos	-	-	-	-	Lipids and lipid-like molecules	Prenol lipids	209.153	M+H-H2O, M+H	C13H20O2	3.5389	0.00480303	51.4	-	-3.0568	-	Sesquiterpenoids
5-Hexenyl glucosinolate	metab_894	-	-	-	HMDB0038416	pos	-	-	-	-	Organic oxygen compounds	Organooxygen compounds	465.101	M+ACN+Na, 2M+K	C13H23NO9S2	3.5171	0.00519332	-	66	9.41275	76265-24-2	Carbohydrates and carbohydrate conjugates
Quercitrin	metab_909	map00944	Flavone and flavonol biosynthesis	C01750	LMPK12112171;HMDB0033751	pos	-	-	Metabolism	Biosynthesis of other secondary metabolites	Phenylpropanoids and polyketides	Flavonoids	449.106	M+H, M+K	C21H20O11	3.1853	0.0166837	86	-	-4.03925	522-12-3	Flavonoid glycosides
5-(3E-Pentenyl)tetrahydro-2-oxo-3-furancarboxylic acid	metab_915	-	-	-	HMDB0030991	pos	-	-	-	-	Organoheterocyclic compounds	Lactones	231.122	M+CH3OH+H, 2M+ACN+Na	C10H14O4	2.8752	0.00154771	-	33	-4.2374	-	Gamma butyrolactones
12-oxo-5E,8E,10Z-dodecatrienoic acid	metab_924	-	-	-	LMFA01060095	pos	-	-	-	-	-	-	209.116	M+H-H2O, M+H	C12H16O3	2.721	0.0160945	50.7	-	-3.36086	-	-
6E-Octene-2,4-diynoic acid	metab_940	-	-	-	LMFA01030743	pos	-	-	-	-	-	-	135.044	M+H-H2O, M+H	C8H6O2	2.6335	0.00150421	52.3	-	-0.408596	-	-
Arginyl-Aspartic acid	metab_945	-	-	-	HMDB0028705	pos	-	-	-	-	Organic acids and derivatives	Carboxylic acids and derivatives	307.175	M+H, M+NH4	C10H19N5O5	2.6114	0.00466817	-	62.1	9.92384	-	Amino acids, peptides, and analogues
(3,4,5,6-tetrahydroxyoxan-2-yl)methyl (2E)-3-(3,4-dihydroxyphenyl)prop-2-enoate	metab_948	-	-	-	HMDB0125114	pos	-	-	-	-	-	-	375.125	M+Na, M+CH3OH+H	C15H18O9	2.3805	0.0234257	-	38.2	-0.635878	-	-
Juglone	metab_949	-	-	C03840	HMDB0030773	pos	-	-	-	-	Benzenoids	Naphthalenes	207.064	M+H, M+CH3OH+H	C10H6O3	2.4005	0.0289181	-	35.5	-3.04638	481-39-0	Naphthoquinones
Kukoamine A	metab_973	-	-	C17615	HMDB0030392	pos	-	-	-	-	Benzenoids	Phenols	531.316	M+2H, M+H	C28H42N4O6	2.1591	0.0416005	51.3	-	-3.74849	75288-96-9	Benzenediols
3-Acetyl-2,7-naphthyridine	metab_980	-	-	-	HMDB0037296	pos	-	-	-	-	Organoheterocyclic compounds	Diazanaphthalenes	173.07	M+H, M+CH3OH+H	C10H8N2O	2.1591	0.0318365	50.8	-	-3.13566	73607-00-8	Naphthyridines
Ethyl maltol	metab_981	-	-	C20362	HMDB0031735	pos	-	-	-	-	Organoheterocyclic compounds	Pyrans	163.038	M+H-H2O, M+Na	C7H8O3	2.1591	0.0132291	-	30.6	-1.60915	4940-11-08	Pyranones and derivatives
Benzaldehyde	metab_985	map01100	Metabolic pathways	C00261	HMDB0006115	pos	-	-	Metabolism	Global and overview maps	Benzenoids	Benzene and substituted derivatives	107.049	M+H, M+ACN+H	C7H6O	2.1156	0.015311	66.7	-	1.06729	100-52-7	Benzoyl derivatives
Indoleacetaldehyde	metab_999	map01100;map00380	Metabolic pathways; Tryptophan metabolism	C00637	HMDB0001190	pos	-	-	Metabolism;Metabolism	Global and overview maps;Amino acid metabolism	Organoheterocyclic compounds	Indoles and derivatives	160.075	M+H, M+NH4	C10H9NO	1.9613	0.00978382	53.6	-	-3.4095	2591-98-2	Indoles
Methyl hydrogen fumarate	metab_1015	-	-	-	HMDB0033809;LMFA07010962	pos	-	-	-	-	Lipids and lipid-like molecules	Fatty Acyls	261.057	M+H-H2O, 2M+H	C5H6O4	1.3434	0.0126062	-	46.1	0.0406011	2756-87-8	Fatty acid esters
5'-O-beta-D-Glucosylpyridoxine	metab_1017	-	-	C03996	-	pos	-	-	-	-	-	-	332.133	M+H-H2O, M+H	C14H21NO8	1.3434	0.0199926	35.6	-	-4.10136	-	-
Sumiki's acid	metab_1033	-	-	C20448	HMDB0002432	pos	-	-	-	-	Organoheterocyclic compounds	Furans	175.06	M+H-H2O, M+CH3OH+H	C6H6O4	1.3827	0.0137644	-	40.9	-1.5162	6338-41-6	Furoic acid and derivatives
5-Fluorodeoxyuridine monophosphate	metab_1071	-	-	C04242	HMDB0060394	pos	-	-	-	-	Nucleosides, nucleotides, and analogues	Pyrimidine nucleotides	365.001	M+Na, M+K	C9H12FN2O8P	1.5088	0.0118597	-	54.5	9.19716	-	Pyrimidine deoxyribonucleotides
Glutathione	metab_1094	map01100;map00270;map00480;map02010	Metabolic pathways; Cysteine and methionine metabolism; Glutathione metabolism; ABC transporters	C00051;C02471	HMDB0000125	pos	Vitamins and Cofactors;-	Cofactors;-	Metabolism;Metabolism;Metabolism;Environmental Information Processing	Global and overview maps;Amino acid metabolism;Metabolism of other amino acids;Membrane transport	Organic acids and derivatives	Carboxylic acids and derivatives	308.09	M+H-H2O, M+H	C10H17N3O6S	1.5942	0.0172229	82.1	-	-4.05122	70-18-8	Amino acids, peptides, and analogues
Niazirinin	metab_1095	-	-	-	HMDB0032808	pos	-	-	-	-	Organic oxygen compounds	Organooxygen compounds	339.154	M+H, M+NH4	C16H19NO6	1.5942	0.0306744	-	45.4	-4.2365	159397-73-6	Carbohydrates and carbohydrate conjugates
Benzofuran	metab_1106	-	-	C14512	HMDB0032929	pos	-	-	-	-	Organoheterocyclic compounds	Benzofurans	136.075	M+H, M+NH4	C8H6O	1.6323	0.00461841	63.8	-	-0.908223	271-89-6	Not Available
Succinic acid semialdehyde	metab_1124	map01100;map00760;map01200;map00250;map00350;map00650;map00750	Metabolic pathways; Nicotinate and nicotinamide metabolism; Carbon metabolism; Alanine, aspartate and glutamate metabolism; Tyrosine metabolism; Butanoate metabolism; Vitamin B6 metabolism	C00232	HMDB0001259;LMFA06000118	pos	Organic acids	Carboxylic acids	Metabolism;Metabolism;Metabolism;Metabolism;Metabolism;Metabolism;Metabolism	Global and overview maps;Metabolism of cofactors and vitamins;Global and overview maps;Amino acid metabolism;Amino acid metabolism;Carbohydrate metabolism;Metabolism of cofactors and vitamins	Lipids and lipid-like molecules	Fatty Acyls	144.065	M+H, M+ACN+H	C4H6O3	1.3434	0.0280549	-	32.9	1.44081	692-29-5	Fatty acids and conjugates
Guanosine	metab_1133	map01100;map02010;map00230	Metabolic pathways; ABC transporters; Purine metabolism	C00387	HMDB0000133	pos	Nucleic acids	Nucleosides	Metabolism;Environmental Information Processing;Metabolism	Global and overview maps;Membrane transport;Nucleotide metabolism	Nucleosides, nucleotides, and analogues	Purine nucleosides	284.098	M+H, M+Na	C10H13N5O5	1.7187	0.0231908	90.7	-	-3.8976	118-00-3	Not Available
4-Pyridoxic acid	metab_1159	map01100;map00750	Metabolic pathways; Vitamin B6 metabolism	C00847	HMDB0000017	pos	-	-	Metabolism;Metabolism	Global and overview maps;Metabolism of cofactors and vitamins	Organoheterocyclic compounds	Pyridines and derivatives	184.06	M+H-2H2O, M+H	C8H9NO4	1.895	0.0305767	89.1	-	-2.7787	82-82-6	Pyridinecarboxylic acids and derivatives
N8-Acetylspermidine	metab_1230	-	-	C01029	HMDB0002189	pos	-	-	-	-	Organic acids and derivatives	Carboximidic acids and derivatives	188.175	M+H	C9H21N3O	1.1846	0.0269251	84	-	-3.78917	34450-15-2	Carboximidic acids
(R)-(+)-2-Pyrrolidone-5-carboxylic acid	metab_1266	map01100	Metabolic pathways	C02237	-	pos	-	-	Metabolism	Global and overview maps	-	-	130.05	M+H	C5H7NO3	1.2855	0.0033633	91.7	-	-2.50805	-	-
Cytosine	metab_1272	map00240;map01100	Pyrimidine metabolism; Metabolic pathways	C00380	HMDB0000630	pos	Nucleic acids	Bases	Metabolism;Metabolism	Nucleotide metabolism;Global and overview maps	Organoheterocyclic compounds	Diazines	112.051	M+H	C4H5N3O	1.305	0.00564687	84.5	-	-0.00659172	71-30-7	Pyrimidines and pyrimidine derivatives
Betaine	metab_1273	map01100;map02010;map00260	Metabolic pathways; ABC transporters; Glycine, serine and threonine metabolism	C00719	HMDB0000043	pos	-	-	Metabolism;Environmental Information Processing;Metabolism	Global and overview maps;Membrane transport;Amino acid metabolism	Organic acids and derivatives	Carboxylic acids and derivatives	118.086	M+H	C5H11NO2	1.305	0.0105575	52.2	-	-0.878948	107-43-7	Amino acids, peptides, and analogues
Fagopyritol B2	metab_1277	-	-	-	HMDB0035322	pos	-	-	-	-	Organic oxygen compounds	Organooxygen compounds	543.13	M+K	C18H32O16	1.305	0.0138977	-	35.6	-4.40422	116261-02-0	Carbohydrates and carbohydrate conjugates
1-Pyrroline	metab_1278	-	-	C15668	HMDB0012497	pos	-	-	-	-	Organoheterocyclic compounds	Pyrrolines	70.0657	M+H	C4H7N	1.3236	0.0128034	-	33.3	8.523	5724-81-2	Not Available
Alpha-(Methylenecyclopropyl)glycine	metab_1294	-	-	C08292	-	pos	-	-	-	-	-	-	128.07	M+H	C6H9NO2	1.3635	0.0191993	55.9	-	-2.12615	-	-
Guanine	metab_1296	map01100;map00230	Metabolic pathways; Purine metabolism	C00242	HMDB0000132	pos	Nucleic acids	Bases	Metabolism;Metabolism	Global and overview maps;Nucleotide metabolism	Organoheterocyclic compounds	Imidazopyrimidines	152.056	M+H	C5H5N5O	1.3635	0.00881129	41	-	-3.4844	73-40-5	Purines and purine derivatives
Xi-4-Hydroxy-4-methyl-2-cyclohexen-1-one	metab_1299	-	-	-	HMDB0033629	pos	-	-	-	-	Organic oxygen compounds	Organooxygen compounds	91.0546	M+H-2H2O	C7H10O2	1.3827	0.00676087	-	55	2.87427	-	Carbonyl compounds
Met-Ser-OH	metab_1303	-	-	-	-	pos	-	-	-	-	-	-	345.078	M+H	C13H16N2O7S	1.3827	0.0117348	55.2	-	7.85651	-	-
Hydroxybutyrylglycine	metab_1385	-	-	-	HMDB0094716	pos	-	-	-	-	Organic acids and derivatives	Carboxylic acids and derivatives	184.057	M+Na	C6H11NO4	1.5942	0.0160083	-	34.4	-4.26757	-	Amino acids, peptides, and analogues
L-Isoleucine	metab_1433	map01100;map01110;map00280;map00290;map01210;map00960;map02010;map01230;map00966;map00460;map00970	Metabolic pathways; Biosynthesis of secondary metabolites; Valine, leucine and isoleucine degradation; Valine, leucine and isoleucine biosynthesis; 2-Oxocarboxylic acid metabolism; Tropane, piperidine and pyridine alkaloid biosynthesis; ABC transporters; Biosynthesis of amino acids; Glucosinolate biosynthesis; Cyanoamino acid metabolism; Aminoacyl-tRNA biosynthesis	C00407	HMDB0000172	pos	Peptides	Amino acids	Metabolism;Metabolism;Metabolism;Metabolism;Metabolism;Metabolism;Environmental Information Processing;Metabolism;Metabolism;Metabolism;Genetic Information Processing	Global and overview maps;Global and overview maps;Amino acid metabolism;Amino acid metabolism;Global and overview maps;Biosynthesis of other secondary metabolites;Membrane transport;Global and overview maps;Biosynthesis of other secondary metabolites;Metabolism of other amino acids;Translation	Organic acids and derivatives	Carboxylic acids and derivatives	132.102	M+H	C6H13NO2	1.6968	0.0271299	69.4	-	-2.59512	73-32-5	Amino acids, peptides, and analogues
Hawkinsin	metab_1462	-	-	-	HMDB0002354	pos	-	-	-	-	Organic acids and derivatives	Carboxylic acids and derivatives	333.114	M+ACN+H	C11H17NO6S	1.8288	0.0196601	-	40.4	9.29527	63224-90-8	Amino acids, peptides, and analogues
4-Hydroxy-2-quinolone	metab_1489	-	-	C16716	-	pos	-	-	-	-	-	-	162.054	M+H	C9H7NO2	1.9832	0.0121715	33.4	-	-3.20692	-	-
Biotinyl-5'-AMP	metab_1490	map01100;map00780	Metabolic pathways; Biotin metabolism	C05921	HMDB0004220	pos	-	-	Metabolism;Metabolism	Global and overview maps;Metabolism of cofactors and vitamins	Nucleosides, nucleotides, and analogues	Purine nucleotides	538.125	M+H-2H2O	C20H28N7O9PS	1.9832	0.0124241	-	39.4	-2.86335	4130-20-5	Purine ribonucleotides
M-Methylbenzoate	metab_1544	map01100	Metabolic pathways	C07211	-	pos	-	-	Metabolism	Global and overview maps	-	-	137.059	M+H	C8H8O2	2.137	0.0146751	46.5	-	-3.25226	-	-
Pantoyllactone glucoside	metab_1549	-	-	-	HMDB0041269	pos	-	-	-	-	Lipids and lipid-like molecules	Fatty Acyls	315.104	M+Na	C12H20O8	2.137	0.0248159	-	35.4	-4.56702	-	Fatty acyl glycosides
Putrescine	metab_1552	map01100;map00480;map01110;map00960;map02010;map00330	Metabolic pathways; Glutathione metabolism; Biosynthesis of secondary metabolites; Tropane, piperidine and pyridine alkaloid biosynthesis; ABC transporters; Arginine and proline metabolism	C02896;C00134	HMDB0001414	pos	-;Peptides	-;Amines	Metabolism;Metabolism;Metabolism;Metabolism;Environmental Information Processing;Metabolism	Global and overview maps;Metabolism of other amino acids;Global and overview maps;Biosynthesis of other secondary metabolites;Membrane transport;Amino acid metabolism	Organic nitrogen compounds	Organonitrogen compounds	89.1077	M+H	C4H12N2	2.1591	0.0116372	86	-	4.51558	110-60-1	Amines
1-Methoxy-1H-indole-3-acetonitrile	metab_1553	-	-	-	HMDB0040973	pos	-	-	-	-	Organoheterocyclic compounds	Indoles and derivatives	187.086	M+H	C11H10N2O	2.1591	0.0220953	48.2	-	-3.43888	30536-48-2	Indoles
N5-Hexanoylspermidine	metab_1565	-	-	-	HMDB0029568	pos	-	-	-	-	Lipids and lipid-like molecules	Fatty Acyls	244.237	M+H	C13H29N3O	2.2037	0.0168968	44.8	-	-3.45391	97141-37-2	Fatty amides
L-2-Amino-5-hydroxypentanoic acid	metab_1568	-	-	-	HMDB0031658	pos	-	-	-	-	Organic acids and derivatives	Carboxylic acids and derivatives	134.081	M+H	C5H11NO3	2.226	0.00685784	32.3	-	-2.55234	-	Amino acids, peptides, and analogues
Delta-Hexalactone	metab_1573	-	-	-	-	pos	-	-	-	-	-	-	115.075	M+H	C6H10O2	2.2483	0.017542	46.2	-	0.0194676	-	-
5'-Deoxy-5'-(methylthio)adenosine	metab_1593	map01100;map00270;map00908	Metabolic pathways; Cysteine and methionine metabolism; Zeatin biosynthesis	C00170	-	pos	-	-	Metabolism;Metabolism;Metabolism	Global and overview maps;Amino acid metabolism;Metabolism of terpenoids and polyketides	-	-	298.096	M+H	C11H15N5O3S	2.2921	0.0257401	90.2	-	-3.62081	-	-
3-Methylindole	metab_1628	map00380	Tryptophan metabolism	C08313	HMDB0000466	pos	-	-	Metabolism	Amino acid metabolism	Organoheterocyclic compounds	Indoles and derivatives	132.08	M+H	C9H9N	2.4005	0.00333444	65.5	-	-2.81097	83-34-1	Indoles
3-Furanmethanol glucoside	metab_1633	-	-	-	HMDB0032924	pos	-	-	-	-	Organic oxygen compounds	Organooxygen compounds	521.182	2M+H	C11H16O7	2.4223	0.0309352	-	49.6	-8.65846	86425-28-7	Carbohydrates and carbohydrate conjugates
Indole	metab_1634	map01100;map00400;map01110;map00380	Metabolic pathways; Phenylalanine, tyrosine and tryptophan biosynthesis; Biosynthesis of secondary metabolites; Tryptophan metabolism	C00463;C19907	HMDB0000738	pos	-	-	Metabolism;Metabolism;Metabolism;Metabolism	Global and overview maps;Amino acid metabolism;Global and overview maps;Amino acid metabolism	Organoheterocyclic compounds	Indoles and derivatives	118.065	M+H	C8H7N	2.4433	0.00210495	60.5	-	-1.00256	120-72-9	Indoles
Cyclohexylammonium	metab_1641	-	-	-	HMDB0062716	pos	-	-	-	-	Organic nitrogen compounds	Organonitrogen compounds	145.084	M+2Na-H	C6H14N+	2.4829	0.00899545	-	43.6	-1.86288	-	Cyclohexylamines
P-Coumaroylagmatine	metab_1648	map01100;map00330	Metabolic pathways; Arginine and proline metabolism	C04498	-	pos	-	-	Metabolism;Metabolism	Global and overview maps;Amino acid metabolism	-	-	277.165	M+H	C14H20N4O2	2.5253	0.0484441	64.1	-	-3.85832	-	-
Dioscoretine	metab_1672	-	-	-	HMDB0038588	pos	-	-	-	-	Lipids and lipid-like molecules	Fatty Acyls	274.2	M+CH3OH+H	C13H23NO3	2.6114	0.00890144	-	67	-4.82077	128637-87-6	Fatty acids and conjugates
(3b,16b,20R)-Pregn-5-ene-3,16,20-triol 3-glucoside	metab_1677	-	-	-	HMDB0041331	pos	-	-	-	-	Lipids and lipid-like molecules	Steroids and steroid derivatives	497.31	M+H	C27H44O8	2.6335	0.0340642	-	40.6	-1.11414	171828-53-8	Steroidal glycosides
M-Salicylic acid	metab_1680	map00400	Phenylalanine, tyrosine and tryptophan biosynthesis	C00587	-	pos	-	-	Metabolism	Amino acid metabolism	-	-	139.039	M+H	C7H6O3	2.6542	0.00786881	49.8	-	-3.31209	-	-
Histamine	metab_1695	map01100;map00340;map01110	Metabolic pathways; Histidine metabolism; Biosynthesis of secondary metabolites	C00388	HMDB0000870	pos	Peptides;Hormones and transmitters;Hormones and transmitters	Amines;Other hormones;Neurotransmitters	Metabolism;Metabolism;Metabolism	Global and overview maps;Amino acid metabolism;Global and overview maps	Organic nitrogen compounds	Organonitrogen compounds	112.087	M+H	C5H9N3	2.7428	0.00143699	66.1	-	0.438463	51-45-6	Amines
(3,4,5,6-tetrahydroxyoxan-2-yl)methyl 4-hydroxybenzoate	metab_1708	-	-	-	HMDB0125107	pos	-	-	-	-	-	-	601.171	2M+H	C13H16O8	2.7871	0.0226563	-	56.7	-8.12853	-	-
Spermine	metab_1714	map01100;map00480;map00330;map00410	Metabolic pathways; Glutathione metabolism; Arginine and proline metabolism; beta-Alanine metabolism	C00750	HMDB0001256	pos	-	-	Metabolism;Metabolism;Metabolism;Metabolism	Global and overview maps;Metabolism of other amino acids;Amino acid metabolism;Metabolism of other amino acids	Organic nitrogen compounds	Organonitrogen compounds	203.222	M+H	C10H26N4	2.8311	0.0200967	61.4	-	-3.36436	71-44-3	Amines
Ilicifolinoside A	metab_1724	-	-	-	HMDB0041186	pos	-	-	-	-	Lipids and lipid-like molecules	Fatty Acyls	287.109	M+Na	C11H20O7	2.8752	0.0224252	-	42	-4.48578	-	Fatty acyl glycosides
2,4-Undecadiene-8,10-diynoic acid 2,3-dehydropiperidide	metab_1753	-	-	-	HMDB0033525	pos	-	-	-	-	Organoheterocyclic compounds	Pyridines and derivatives	240.137	M+H	C16H17NO	3.0522	0.0261588	-	50.8	-3.5239	52704-38-8	Hydropyridines
1,4,5-Naphthalenetriol	metab_1756	-	-	-	HMDB0032883	pos	-	-	-	-	Benzenoids	Naphthalenes	177.054	M+H	C10H8O3	3.0743	0.016411	46.1	-	-3.49655	481-40-3	Naphthols and derivatives
9,10,13-TriHOME	metab_1775	map00591	Linoleic acid metabolism	C14835	HMDB0004710	pos	-	-	Metabolism	Lipid metabolism	Lipids and lipid-like molecules	Fatty Acyls	348.273	M+NH4	C18H34O5	3.1853	0.0277465	-	51.2	-4.30108	29907-57-1	Fatty acids and conjugates
Crosatoside B	metab_1855	-	-	-	HMDB0039253	pos	-	-	-	-	Organic oxygen compounds	Organooxygen compounds	429.171	M+H-H2O	C20H30O11	3.5605	0.0165653	-	36.5	-9.02009	139742-28-2	Carbohydrates and carbohydrate conjugates
2,4-Dimethylbenzaldehyde	metab_1857	-	-	-	HMDB0032142	pos	-	-	-	-	Benzenoids	Benzene and substituted derivatives	135.08	M+H	C9H10O	3.5829	0.00889631	53.3	-	-3.03706	15764-16-6	Benzoyl derivatives
Discodermolide	metab_1867	-	-	C16746	-	pos	-	-	-	-	-	-	594.398	M+H	C33H55NO8	3.6052	0.0153305	65.7	-	-4.01273	-	-
3,4-Dimethylstyrene	metab_1868	-	-	-	-	pos	-	-	-	-	-	-	133.101	M+H	C10H12	3.6275	0.00964942	58.3	-	-2.80814	-	-
N-stearoyl tyrosine	metab_1889	-	-	-	HMDB0062343;LMFA08020100	pos	-	-	-	-	Organic acids and derivatives	Carboxylic acids and derivatives	448.34	M+H	C27H45NO4	3.7597	0.00554947	58.7	-	-4.06449	-	Amino acids, peptides, and analogues
Isorhamnetin	metab_1903	-	-	C10084	HMDB0002655;LMPK12110002	pos	-	-	-	-	Phenylpropanoids and polyketides	Flavonoids	317.064	M+H	C16H12O7	3.826	0.0139964	77.5	-	-3.60307	480-19-3	Flavones
Cinnatriacetin A	metab_1904	-	-	-	HMDB0033932	pos	-	-	-	-	Phenylpropanoids and polyketides	Cinnamic acids and derivatives	359.13	M+H-H2O	C23H20O5	3.826	0.0522815	-	57.6	4.99871	-	Hydroxycinnamic acids and derivatives
(3beta,22E,24R)-3-Hydroxyergosta-5,8,22-trien-7-one	metab_1912	-	-	-	HMDB0032106	pos	-	-	-	-	Lipids and lipid-like molecules	Steroids and steroid derivatives	428.351	M+NH4	C28H42O2	3.8705	0.014078	-	47.5	-3.89747	200942-18-3	Ergostane steroids
Ganoderic acid W	metab_1914	-	-	-	HMDB0033078	pos	-	-	-	-	Lipids and lipid-like molecules	Prenol lipids	590.403	M+NH4	C34H52O7	3.8705	0.0176585	-	80.3	-4.26128	86377-49-3	Sesterterpenoids
Isosyringinoside	metab_1952	-	-	-	HMDB0040814	pos	-	-	-	-	Organic oxygen compounds	Organooxygen compounds	552.232	M+NH4	C23H34O14	4.1136	0.0126211	-	81.9	6.05597	152686-85-6	Carbohydrates and carbohydrate conjugates
(5R,6S)-5,6-Epoxy-7-megastigmen-9-one	metab_1956	-	-	-	HMDB0034984	pos	-	-	-	-	Organoheterocyclic compounds	Oxepanes	209.153	M+H	C13H20O2	4.136	0.0159794	47.8	-	-3.81354	-	Not Available
Agavoside A	metab_1958	-	-	C08885	LMST01080006;HMDB0034391	pos	-	-	-	-	Lipids and lipid-like molecules	Steroids and steroid derivatives	634.392	M+ACN+H	C33H52O9	4.136	0.0201001	-	90	-4.49649	56857-65-9	Steroidal glycosides
Ethyl 3-hydroxydodecanoate	metab_1959	-	-	-	HMDB0059850	pos	-	-	-	-	Lipids and lipid-like molecules	Fatty Acyls	262.237	M+NH4	C14H28O3	4.1583	0.0398962	-	46.7	-4.03376	-	Fatty alcohols
Solasodine	metab_1974	-	-	C10822	LMST01150004;HMDB0035282	pos	-	-	-	-	Lipids and lipid-like molecules	Steroids and steroid derivatives	414.335	M+H	C27H43NO2	4.2468	0.00530085	83.4	-	-4.42431	126-17-0	Steroidal alkaloids
Androstenedione	metab_1980	map01100	Metabolic pathways	C00280	LMST02020007;HMDB0000053	pos	Steroids;Hormones and transmitters	19-Carbon atoms;Steroid hormones	Metabolism	Global and overview maps	Lipids and lipid-like molecules	Steroids and steroid derivatives	636.408	2M+ACN+Na	C19H26O2	4.2468	0.0161373	-	59.4	9.28637	1963-05-08	Androstane steroids
Glucosyl passiflorate	metab_1981	-	-	-	HMDB0038141	pos	-	-	-	-	Lipids and lipid-like molecules	Prenol lipids	738.439	M+ACN+H	C37H60O12	4.2468	0.0426034	-	87.9	-4.99279	1392-82-1	Terpene glycosides
Schidigerasaponin F2	metab_1982	-	-	-	HMDB0036244	pos	-	-	-	-	Organic oxygen compounds	Organooxygen compounds	798.46	M+ACN+H	C39H64O14	4.2468	0.0112542	-	95.6	-5.14356	267003-05-4	Carbohydrates and carbohydrate conjugates
Megastigmatrienone	metab_1988	-	-	-	HMDB0059906	pos	-	-	-	-	Organic oxygen compounds	Organooxygen compounds	191.142	M+H	C13H18O	4.3132	0.0190097	44.2	-	-3.92678	-	Carbonyl compounds
Fasciculic acid C	metab_2000	-	-	-	LMST01010390;HMDB0036440	pos	-	-	-	-	Lipids and lipid-like molecules	Prenol lipids	710.444	M+H	C38H63NO11	4.3773	0.0111256	58.3	-	-4.74931	126882-56-2	Triterpenoids
Theasapogenol A	metab_2022	-	-	-	HMDB0034519	pos	-	-	-	-	Lipids and lipid-like molecules	Prenol lipids	548.392	M+ACN+H	C30H50O6	4.5476	0.00627097	-	36.3	-4.51427	13844-22-9	Triterpenoids
Torvoside G	metab_2029	-	-	-	HMDB0030337	pos	-	-	-	-	Lipids and lipid-like molecules	Glycerolipids	650.423	M+ACN+H	C34H56O9	4.6124	0.023033	-	73.8	-4.54633	184777-22-8	Triradylcglycerols
Dehydrovomifoliol	metab_2033	-	-	C04223;C02533	HMDB0036819;LMPR0103050009	pos	-	-	-	-	Lipids and lipid-like molecules	Prenol lipids	187.111	M+H-2H2O	C13H18O3	4.6566	0.00898313	-	55	-2.95666	15764-81-5	Sesquiterpenoids
Kaempferol	metab_2045	map01100;map00941;map01110;map00944	Metabolic pathways; Flavonoid biosynthesis; Biosynthesis of secondary metabolites; Flavone and flavonol biosynthesis	C05903	HMDB0005801;LMPK12110003	pos	-	-	Metabolism;Metabolism;Metabolism;Metabolism	Global and overview maps;Biosynthesis of other secondary metabolites;Global and overview maps;Biosynthesis of other secondary metabolites	Phenylpropanoids and polyketides	Flavonoids	287.054	M+H	C15H10O6	4.8333	0.0136849	70.6	-	-4.04395	520-18-3	Flavones
Trans-Grandmarin	metab_2062	-	-	-	HMDB0039030	pos	-	-	-	-	Phenylpropanoids and polyketides	Coumarins and derivatives	257.08	M+H-2H2O	C15H16O6	5.0092	0.0191839	-	56.4	-3.85817	119239-48-4	Pyranocoumarins
8-{(1s,5r)-4-Oxo-5-[(2z)-2-penten-1-yl]-2-cyclopenten-1-yl}octanoic acid	metab_2064	-	-	-	-	pos	-	-	-	-	-	-	275.199	M+H-H2O	C18H28O3	5.0313	0.0355087	51.5	-	-3.67846	-	-
3 beta-Hydroxy-5-cholestenoate	metab_2072	-	-	C17333	HMDB0012453	pos	-	-	-	-	Lipids and lipid-like molecules	Steroids and steroid derivatives	417.335	M+H	C27H44O3	5.1192	0.01022	-	31.2	-3.87279	6561-58-6	Bile acids, alcohols and derivatives
Tetrahydroaldosterone-3-glucuronide	metab_2082	map01100;map00040	Metabolic pathways; Pentose and glucuronate interconversions	C03033	HMDB0010357;LMST05010067	pos	-	-	Metabolism;Metabolism	Global and overview maps;Carbohydrate metabolism	Lipids and lipid-like molecules	Steroids and steroid derivatives	563.244	M+Na	C27H40O11	5.2059	0.0372213	-	70.3	-4.67365	20605-81-6	Steroidal glycosides
Neoconvallatoxoloside	metab_2085	-	-	-	HMDB0030566	pos	-	-	-	-	Lipids and lipid-like molecules	Steroids and steroid derivatives	697.337	M+H-H2O	C35H54O15	5.2278	0.194785	-	35.6	-7.73872	64766-15-0	Steroid lactones
Isoplumbagin	metab_2098	-	-	-	HMDB0035291	pos	-	-	-	-	Benzenoids	Naphthalenes	189.054	M+H	C11H8O3	5.4886	0.0629567	47.3	-	-3.42545	14777-17-4	Naphthoquinones
Teinemine	metab_2104	-	-	-	LMST01150010	pos	-	-	-	-	-	-	416.351	M+H	C27H45NO2	5.6188	0.0125703	72.4	-	-4.32442	-	-
Alpha-Bisabolol oxide C	metab_2141	-	-	-	HMDB0038138	pos	-	-	-	-	Organoheterocyclic compounds	Oxanes	271.226	M+CH3OH+H	C15H26O2	6.0986	0.0143003	-	78.2	-4.8423	59861-08-4	Not Available
Lauryl diethanolamide	metab_2142	-	-	-	-	pos	-	-	-	-	-	-	310.234	M+Na	C16H33NO3	6.0986	0.0110086	55.3	-	-4.67593	-	-
10,20-Dihydroxyeicosanoic acid	metab_2146	-	-	-	HMDB0031923	pos	-	-	-	-	Lipids and lipid-like molecules	Fatty Acyls	362.325	M+NH4	C20H40O4	6.1629	0.0116034	-	79.1	-4.7222	120727-26-6	Fatty acids and conjugates
6-Hydroxyoctadecanoic acid	metab_2148	-	-	-	HMDB0112193	pos	-	-	-	-	Lipids and lipid-like molecules	Fatty Acyls	318.299	M+NH4	C18H36O3	6.1849	0.0144272	-	33.7	-4.38926	3158-47-2	Fatty acids and conjugates
Xestoaminol C	metab_2154	-	-	-	LMSP01080033	pos	-	-	-	-	-	-	230.247	M+H	C14H31NO	6.2923	0.0130349	77.5	-	-3.85539	-	-
MG(15:0/0:0/0:0)	metab_2156	-	-	-	HMDB0011563	pos	-	-	-	-	Lipids and lipid-like molecules	Glycerolipids	334.294	M+NH4	C18H36O4	6.3134	0.0114089	-	53.6	-4.72987	-	Monoradylglycerols
Diplosporin	metab_2164	-	-	-	HMDB0030680	pos	-	-	-	-	Organoheterocyclic compounds	Pyrans	189.09	M+H-2H2O	C12H16O4	6.3554	0.0334145	-	43.5	-3.09234	69199-05-9	Pyranones and derivatives
Distichonic acid A	metab_2215	-	-	-	HMDB0038752	pos	-	-	-	-	Organic acids and derivatives	Carboxylic acids and derivatives	295.116	M+H	C10H18N2O8	6.9592	0.00624386	33.9	-	9.66738	84495-20-5	Amino acids, peptides, and analogues
Sphinganine	metab_2216	map00600;map01100	Sphingolipid metabolism; Metabolic pathways	C00836	LMSP01020001;HMDB0000269	pos	-	-	Metabolism;Metabolism	Lipid metabolism;Global and overview maps	Organic nitrogen compounds	Organonitrogen compounds	302.304	M+H	C18H39NO2	6.9592	0.0107091	82.3	-	-4.16743	764-22-7	Amines
Austalide L	metab_2217	-	-	-	HMDB0030158	pos	-	-	-	-	Phenylpropanoids and polyketides	Flavonoids	446.252	M+NH4	C25H32O6	6.9592	0.0297888	-	50.2	-4.43962	87833-52-1	Flavones
12-OPDA	metab_2251	map01100;map00592;map01110	Metabolic pathways; alpha-Linolenic acid metabolism; Biosynthesis of secondary metabolites	C01226	-	pos	-	-	Metabolism;Metabolism;Metabolism	Global and overview maps;Lipid metabolism;Global and overview maps	-	-	293.21	M+H	C18H28O3	7.5646	0.0115102	84.6	-	-4.68704	-	-
N,N-dimethyl-Safingol	metab_2256	-	-	-	LMSP01080056	pos	-	-	-	-	-	-	330.335	M+H	C20H43NO2	7.6299	0.00890495	82	-	-4.34794	-	-
Spisulosine	metab_2264	-	-	-	LMSP01080032	pos	-	-	-	-	-	-	286.309	M+H	C18H39NO	7.7154	0.0119692	69	-	-4.09888	-	-
N-Hexadecanoylpyrrolidine	metab_2268	-	-	-	HMDB0032740	pos	-	-	-	-	Organoheterocyclic compounds	Pyrrolidines	327.336	M+NH4	C20H39NO	7.7586	7.19992e-05	-	61.1	-4.43969	70974-48-0	N-acylpyrrolidines
9-HOTE	metab_2283	-	-	-	HMDB0010224	pos	-	-	-	-	Lipids and lipid-like molecules	Fatty Acyls	277.215	M+H-H2O	C18H30O3	7.8876	0.0175837	-	34.6	-3.65021	-	Lineolic acids and derivatives
(±)-Furaneol	metab_2299	-	-	-	HMDB0040594	pos	-	-	-	-	Organoheterocyclic compounds	Dihydrofurans	129.054	M+H	C6H8O3	8.0614	0.00235492	40.8	-	-2.32406	-	Furanones
3,5,7-Trimethyl-2E,4E,6E,8E-decatetraene	metab_2308	-	-	-	LMFA11000054	pos	-	-	-	-	-	-	177.163	M+H	C13H20	8.1691	0.010782	35.1	-	-3.65008	-	-
Anandamide (20:l, n-9)	metab_2353	-	-	-	LMFA08040010	pos	-	-	-	-	-	-	354.335	M+H	C22H43NO2	8.6402	0.0242617	50.3	-	-4.1759	-	-
11alpha-Hemiglutaryloxy-1,25-dihydroxyvitamin D3	metab_2365	-	-	-	LMST03020617	pos	-	-	-	-	-	-	545.382	M+H	C33H52O6	8.7692	0.0213323	44.9	-	-3.81561	-	-
DG(20:5(5Z,8Z,11Z,14Z,17Z)/22:6(4Z,7Z,10Z,13Z,16Z,19Z)/0:0)	metab_2387	-	-	-	HMDB0007585	pos	-	-	-	-	Lipids and lipid-like molecules	Glycerolipids	725.456	M+K	C45H66O5	8.9849	0.00742839	-	42.6	2.52934	-	Diradylglycerols
D6-Ambrettolide	metab_2418	-	-	-	HMDB0037805	pos	-	-	-	-	Phenylpropanoids and polyketides	Macrolides and analogues	217.194	M+H-2H2O	C16H28O2	9.3499	0.00884813	-	51.5	-3.27397	7779-50-2	Not Available
Nonadecanoic acid	metab_2436	-	-	C16535	HMDB0000772;LMFA01010019	pos	-	-	-	-	Lipids and lipid-like molecules	Fatty Acyls	316.32	M+NH4	C19H38O2	9.5982	0.0350969	-	89.2	-4.31935	646-30-0	Fatty acids and conjugates
Pentadecanol	metab_2446	-	-	-	HMDB0013299	pos	-	-	-	-	Lipids and lipid-like molecules	Fatty Acyls	270.278	M+ACN+H	C15H32O	9.916	0.00423689	-	68	-4.95712	629-76-5	Fatty alcohols
Alpha-Camphorene	metab_2452	-	-	-	HMDB0036852	pos	-	-	-	-	Lipids and lipid-like molecules	Prenol lipids	273.256	M+H	C20H32	9.9584	0.00718224	31.4	-	-4.3755	532-87-6	Sesquiterpenoids
Polyoxyethylene (600) monoricinoleate	metab_2511	-	-	-	HMDB0032476	pos	-	-	-	-	Lipids and lipid-like molecules	Fatty Acyls	363.288	M+Na	C21H40O3	10.1736	0.0450568	-	68.8	1.88113	9004-97-1	Fatty alcohols
1,3-Diisopropylbenzene	metab_2573	-	-	-	HMDB0013806	pos	-	-	-	-	Benzenoids	Benzene and substituted derivatives	163.147	M+H	C12H18	10.6292	0.0222417	38.3	-	-3.9779	99-62-7	Cumenes
(R)-Carvotanacetone	metab_2574	-	-	-	HMDB0034974	pos	-	-	-	-	Lipids and lipid-like molecules	Prenol lipids	170.153	M+NH4	C10H16O	10.6292	0.00913688	-	69.8	-4.2719	33375-08-5	Monoterpenoids
Lycopersiconol	metab_2582	-	-	-	HMDB0029583	pos	-	-	-	-	Lipids and lipid-like molecules	Steroids and steroid derivatives	335.257	M+H	C21H34O3	10.7384	0.0233833	-	40	-4.45145	20745-29-3	Pregnane steroids
PS(16:1(9Z)/18:3(9Z,12Z,15Z))	metab_2610	-	-	-	HMDB0012370;LMGP03010213	pos	-	-	-	-	Lipids and lipid-like molecules	Glycerophospholipids	773.514	M+NH4	C40H70NO10P	10.892	0.0895303	-	61.9	8.56239	-	Glycerophosphoserines
THYMOQUINONE	metab_2620	-	-	-	HMDB0034732	pos	-	-	-	-	Organic oxygen compounds	Organooxygen compounds	165.09	M+H	C10H12O2	10.9581	0.0119784	47.1	-	-3.59988	490-91-5	Carbonyl compounds
PS(18:1(9Z)/18:3(9Z,12Z,15Z))	metab_2639	-	-	-	HMDB0012392;LMGP03010880	pos	-	-	-	-	Lipids and lipid-like molecules	Glycerophospholipids	801.545	M+NH4	C42H74NO10P	11.1783	0.0668119	-	74	7.85154	-	Glycerophosphoserines
PA(18:3(9Z,12Z,15Z)/22:1(13Z))	metab_2643	-	-	-	HMDB0115019	pos	-	-	-	-	Lipids and lipid-like molecules	Glycerophospholipids	775.529	M+Na	C43H77O8P	11.2009	0.0143945	-	92.3	6.14374	-	Glycerophosphates
Melleolide M	metab_2705	-	-	-	HMDB0035068	pos	-	-	-	-	Lipids and lipid-like molecules	Prenol lipids	453.164	M+H	C23H29ClO7	12.4516	0.00913476	-	57.5	-7.22593	-	Sesquiterpenoids
Ustiloxin B	metab_2708	-	-	-	HMDB0041373	pos	-	-	-	-	Lipids and lipid-like molecules	Prenol lipids	684.2	M+K	C26H39N5O12S	12.6043	0.0232964	-	41.4	7.92295	151841-41-7	Diterpenoids
L-Nicotine	metab_2772	map00960;map01110	Tropane, piperidine and pyridine alkaloid biosynthesis; Biosynthesis of secondary metabolites	C00745	-	pos	-	-	Metabolism;Metabolism	Biosynthesis of other secondary metabolites;Global and overview maps	-	-	163.122	M+H	C10H14N2	14.5313	0.00864611	84.9	-	-3.96044	-	-
Glutaminylhistidine	metab_2848	-	-	-	HMDB0028799	pos	-	-	-	-	Organic acids and derivatives	Carboxylic acids and derivatives	266.122	M+H-H2O	C11H17N5O4	14.8471	0.00386621	-	36.7	-9.98751	104018-08-8	Amino acids, peptides, and analogues
DG(16:0/18:3(6Z,9Z,12Z)/0:0)	metab_3170	-	-	-	HMDB0007104	pos	-	-	-	-	Lipids and lipid-like molecules	Fatty Acyls	573.485	M+H-H2O	C37H66O5	13.3492	0.0338125	-	44.9	-3.96651	-	Lineolic acids and derivatives
3-Hexylpyridine	metab_3171	-	-	-	HMDB0039804	pos	-	-	-	-	Organoheterocyclic compounds	Pyridines and derivatives	164.143	M+H	C11H17N	13.3492	0.0055538	-	66.5	-3.32198	6311-92-8	Not Available
5-Butyl-4-ethyl-2-methyloxazole	metab_3176	-	-	-	HMDB0037885	pos	-	-	-	-	Organoheterocyclic compounds	Azoles	150.127	M+H-H2O	C10H17NO	13.2182	0.00428871	-	45.9	-3.02445	84027-98-5	Oxazoles
AS 1-1	metab_3229	-	-	-	HMDB0032794	pos	-	-	-	-	Lipids and lipid-like molecules	Sphingolipids	708.508	M+Na	C38H71NO9	11.8608	0.0277387	-	37.4	8.78947	-	Glycosphingolipids
PS(16:0/18:2(9Z,12Z))	metab_3260	-	-	-	HMDB0012358;LMGP03010976	pos	-	-	-	-	Lipids and lipid-like molecules	Glycerophospholipids	777.545	M+NH4	C40H74NO10P	11.4866	0.0320283	-	55.3	8.10424	-	Glycerophosphoserines
Phosphocholine	metab_3305	map01100;map00564	Metabolic pathways; Glycerophospholipid metabolism	C00588	-	pos	-	-	Metabolism;Metabolism	Global and overview maps;Lipid metabolism	-	-	184.073	M+H	C5H14NO4P	11.1129	0.0154629	60.1	-	-3.61014	-	-
PE-NMe(18:1(11Z)/18:3(9Z,12Z,15Z))	metab_3309	-	-	-	HMDB0113118	pos	-	-	-	-	Lipids and lipid-like molecules	Glycerophospholipids	736.53	M+H-H2O	C42H76NO8P	11.0681	0.00727376	-	89.8	2.99291	-	Glycerophosphoethanolamines
Asiminenin A	metab_3329	-	-	-	HMDB0029959	pos	-	-	-	-	Lipids and lipid-like molecules	Fatty Acyls	629.473	M+Na	C37H66O6	10.9581	0.0228036	-	34.8	-4.23144	168075-11-4	Fatty alcohols
Allivicin	metab_3330	-	-	-	HMDB0037431	pos	-	-	-	-	Phenylpropanoids and polyketides	Flavonoids	593.155	M+H-H2O	C27H30O16	10.9581	0.0651048	-	37.9	8.71202	71939-16-7	Flavonoid glycosides
MGDG(20:5(5Z,8Z,11Z,14Z,17Z)/18:3(9Z,12Z,15Z))	metab_3335	-	-	-	LMGL05010013	pos	-	-	-	-	-	-	799.529	M+H	C47H74O10	10.936	0.0198116	33.8	-	-7.86014	-	-
DG(18:4(6Z,9Z,12Z,15Z)/18:1(11Z)/0:0)	metab_3338	-	-	-	HMDB0007333	pos	-	-	-	-	Lipids and lipid-like molecules	Fatty Acyls	615.496	M+H	C39H66O5	10.936	0.0230933	33.7	-	-3.80354	-	Lineolic acids and derivatives
AS 1-2	metab_3349	-	-	-	HMDB0032795	pos	-	-	-	-	Lipids and lipid-like molecules	Sphingolipids	722.514	M+Na	C39H73NO9	10.892	0.023084	-	31	-4.69872	-	Glycosphingolipids
PC(16:1(9Z)/18:4(6Z,9Z,12Z,15Z))	metab_3366	-	-	-	LMGP01010692;HMDB0008009	pos	-	-	-	-	Lipids and lipid-like molecules	Glycerophospholipids	734.514	M+H-H2O	C42H74NO8P	10.8039	0.0198251	-	40.8	2.79657	-	Glycerophosphocholines
PELLETIERINE	metab_3412	map01100;map00960;map01110	Metabolic pathways; Tropane, piperidine and pyridine alkaloid biosynthesis; Biosynthesis of secondary metabolites	C06182	-	pos	-	-	Metabolism;Metabolism;Metabolism	Global and overview maps;Biosynthesis of other secondary metabolites;Global and overview maps	-	-	142.122	M+H	C8H15NO	10.6292	0.00433509	31.8	-	-3.31203	-	-
TG(8:0/8:0/8:0)	metab_3419	-	-	C13044	HMDB0011187	pos	-	-	-	-	Lipids and lipid-like molecules	Glycerolipids	493.348	M+Na	C27H50O6	10.6075	0.00831366	-	79.9	-4.21904	538-23-8	Triradylcglycerols
Squamotacin	metab_3424	-	-	-	HMDB0030444	pos	-	-	-	-	Lipids and lipid-like molecules	Fatty Acyls	645.467	M+Na	C37H66O7	10.5637	0.0513599	-	50.7	-4.59624	174158-66-8	Fatty alcohols
Benzoquinoneacetic acid	metab_3491	-	-	-	HMDB0002334	pos	-	-	-	-	Organic oxygen compounds	Organooxygen compounds	167.033	M+H	C8H6O4	10.3237	0.0137645	91.5	-	-3.4612	10275-07-7	Carbonyl compounds
Cumene	metab_3508	-	-	C14396	-	pos	-	-	-	-	-	-	121.101	M+H	C9H12	10.2163	0.000783257	50.8	-	-1.12587	-	-
2-Cyclotetradecen-1-one	metab_3509	-	-	-	HMDB0039884	pos	-	-	-	-	Organic oxygen compounds	Organooxygen compounds	226.216	M+NH4	C14H24O	10.2163	0.00775513	-	57.3	-4.43188	55395-12-5	Carbonyl compounds
Cis-Quinceoxepane	metab_3510	-	-	-	HMDB0038108	pos	-	-	-	-	Organoheterocyclic compounds	Oxepanes	198.185	M+NH4	C12H20O	10.2163	0.00800293	-	51.2	-4.07706	133005-51-3	Not Available
Nitramine	metab_3511	-	-	C10163	-	pos	-	-	-	-	-	-	170.153	M+H	C10H19NO	10.2163	0.0131689	30.8	-	-3.74609	-	-
Heneicosanoic acid	metab_3517	-	-	-	LMFA01010021;HMDB0002345	pos	-	-	-	-	Lipids and lipid-like molecules	Fatty Acyls	344.351	M+NH4	C21H42O2	10.1736	0.0370062	-	89.8	-4.41666	2363-71-5	Fatty acids and conjugates
D-Glucaro-1,4-lactone	metab_3531	-	-	C21095	HMDB0041862	pos	-	-	-	-	Organoheterocyclic compounds	Lactones	236.997	M+2Na-H	C6H8O7	10.1516	0.0219354	-	36.8	-4.64871	5027-63-4	Gamma butyrolactones
12,15-Epoxy-13,14-dimethyleicosa-12,14,16-trienoic acid	metab_3553	-	-	-	HMDB0112073	pos	-	-	-	-	Lipids and lipid-like molecules	Fatty Acyls	349.272	M+H	C22H36O3	10.0874	0.00638156	-	37.5	-4.39743	-	Fatty acids and conjugates
Furanodiene	metab_3560	-	-	C16959	HMDB0036769	pos	-	-	-	-	Lipids and lipid-like molecules	Prenol lipids	249.184	M+CH3OH+H	C15H20O	10.0656	0.0231367	-	41.6	-4.41893	-	Sesquiterpenoids
2-Pentadecylfuran	metab_3565	-	-	-	HMDB0033609	pos	-	-	-	-	Organoheterocyclic compounds	Heteroaromatic compounds	296.294	M+NH4	C19H34O	10.044	0.040327	-	53.8	-4.09592	59958-20-2	Not Available
6-Tridecynoic acid	metab_3596	-	-	-	LMFA01030599	pos	-	-	-	-	-	-	211.168	M+H	C13H22O2	9.9363	0.0159991	57.2	-	-3.88385	-	-
2-Hydroxydecanoate	metab_3597	-	-	-	HMDB0094656	pos	-	-	-	-	Lipids and lipid-like molecules	Fatty Acyls	221.174	M+CH3OH+H	C10H20O3	9.9363	0.0215478	-	36.1	-3.05113	-	Fatty acids and conjugates
Spirolide E	metab_3608	-	-	-	HMDB0030494	pos	-	-	-	-	Lipids and lipid-like molecules	Fatty Acyls	748.473	M+Na	C43H67NO8	9.7754	0.148696	-	69.1	-4.40252	183159-71-9	Fatty alcohols
Acrylamide	metab_3618	-	-	C01659	HMDB0004296	pos	-	-	-	-	Organic acids and derivatives	Carboximidic acids and derivatives	72.0448	M+H	C3H5NO	9.6401	0.0118788	51.8	-	6.42722	1979-06-01	Carboximidic acids
6-pentadecyl Salicylic Acid	metab_3620	-	-	-	LMPK15040002	pos	-	-	-	-	-	-	349.272	M+H	C22H36O3	9.6401	0.0174585	37.7	-	-4.31947	-	-
4,8-Dimethyl-1,3(E),7-nonatriene	metab_3621	-	-	-	LMFA11000425	pos	-	-	-	-	-	-	153.163	M+H	C11H20	9.7159	0.00865294	32.1	-	-3.81855	-	-
2-Isopropyl-1,4-hexadiene	metab_3624	-	-	-	HMDB0037777	pos	-	-	-	-	Hydrocarbons	Unsaturated hydrocarbons	125.132	M+H	C9H16	9.7159	0.00634924	41.2	-	-1.89747	-	Branched unsaturated hydrocarbons
Delta-Valerolactam	metab_3627	-	-	-	-	pos	-	-	-	-	-	-	100.076	M+H	C5H9NO	9.7159	0.00598124	55.3	-	2.00045	-	-
3-Methylcyclopentene	metab_3630	-	-	-	HMDB0031544	pos	-	-	-	-	Hydrocarbons	Unsaturated hydrocarbons	83.086	M+H	C6H10	9.7159	0.0045083	37	-	5.37938	1120-62-3	Olefins
Cer(d18:0/16:0)	metab_3634	-	-	-	LMSP02020001;HMDB0011760	pos	-	-	-	-	Lipids and lipid-like molecules	Sphingolipids	540.533	M+H	C34H69NO3	9.6401	0.0423892	-	37.5	-4.13579	-	Ceramides
LysoPA(0:0/18:2(9Z,12Z))	metab_3638	-	-	-	HMDB0007852	pos	-	-	-	-	Lipids and lipid-like molecules	Glycerophospholipids	457.23	M+Na	C21H39O7P	9.5982	0.00814721	-	67.7	-4.95009	-	Glycerophosphates
(Z)-9-Cycloheptadecen-1-one	metab_3662	-	-	-	HMDB0031336	pos	-	-	-	-	Organic oxygen compounds	Organooxygen compounds	268.262	M+NH4	C17H30O	9.3913	0.0104567	-	72	-4.91423	542-46-1	Carbonyl compounds
Cer(d18:0/14:0)	metab_3665	-	-	-	LMSP02020016;HMDB0011759	pos	-	-	-	-	Lipids and lipid-like molecules	Sphingolipids	512.502	M+H	C32H65NO3	9.3706	0.0088106	-	44.3	-3.68869	-	Ceramides
(E)-4,8-Dimethyl-1,3,7-nonatriene	metab_3667	-	-	-	HMDB0035792	pos	-	-	-	-	Lipids and lipid-like molecules	Prenol lipids	151.148	M+H	C11H18	9.3913	0.00683444	49.4	-	-3.53122	19945-61-0	Monoterpenoids
2,2,6,6-Tetramethyl-4-piperidinone	metab_3668	-	-	-	HMDB0031179	pos	-	-	-	-	Organoheterocyclic compounds	Piperidines	156.138	M+H	C9H17NO	9.3913	0.00752636	45.8	-	-3.33859	826-36-8	Piperidinones
Alpha-Terpinene	metab_3670	-	-	C09898;C09900	HMDB0036995;LMPR0102090026	pos	-	-	-	-	Lipids and lipid-like molecules	Prenol lipids	137.132	M+H	C10H16	9.3913	0.00430857	74.7	-	-3.40405	99-86-5	Monoterpenoids
P-Isopropylphenol	metab_3672	-	-	-	HMDB0031446	pos	-	-	-	-	Benzenoids	Benzene and substituted derivatives	137.096	M+H	C9H12O	9.3913	0.0305933	58.2	-	-3.27305	99-89-8	Cumenes
3-Epinobilin	metab_3683	-	-	-	HMDB0036690	pos	-	-	-	-	Lipids and lipid-like molecules	Prenol lipids	364.214	M+NH4	C20H26O5	9.3279	0.00439338	-	75.2	7.01754	-	Terpene lactones
Demeclocycline	metab_3698	-	-	-	HMDB0014756	pos	-	-	-	-	Phenylpropanoids and polyketides	Tetracyclines	429.087	M+H-2H2O	C21H21ClN2O8	9.1802	0.0589721	-	57.6	4.88658	127-33-3	Not Available
15-hydroxyicosanoic acid	metab_3699	-	-	-	HMDB0061665	pos	-	-	-	-	Lipids and lipid-like molecules	Fatty Acyls	392.312	M+ACN+Na	C20H40O3	9.1802	0.0300815	-	73.8	-5.22473	-	Fatty acids and conjugates
1,2-Dimethyl-4-(6-methyl-4-heptenyl)-1,3-cyclohexadiene	metab_3726	-	-	-	HMDB0037740	pos	-	-	-	-	Hydrocarbons	Unsaturated hydrocarbons	219.21	M+H	C16H26	9.0497	0.015404	42.3	-	-3.88256	-	Branched unsaturated hydrocarbons
Hexaethylene glycol	metab_3763	-	-	-	HMDB0061822	pos	-	-	-	-	Organic oxygen compounds	Organooxygen compounds	283.174	M+H	C12H26O7	8.8549	0.0078153	-	41	-4.22249	2615-15-8	Ethers
Hericene B	metab_3765	-	-	-	HMDB0041180	pos	-	-	-	-	Lipids and lipid-like molecules	Prenol lipids	600.466	M+NH4	C37H58O5	8.8122	0.0122631	-	58.2	5.63399	157207-55-1	Monoterpenoids
6-(carboxymethoxy)-3,4,5-trihydroxyoxane-2-carboxylic acid	metab_3805	-	-	-	HMDB0124938	pos	-	-	-	-	-	-	217.033	M+H-2H2O	C8H12O9	8.5542	0.00932357	-	32.2	-3.36625	-	-
1-Nitroheptane	metab_3806	-	-	-	HMDB0013811	pos	-	-	-	-	Organic 1,3-dipolar compounds	Allyl-type 1,3-dipolar organic compounds	185.08	M+K	C7H16NO2+	8.5542	0.00456728	-	33.6	-7.40225	693-39-0	Organic nitro compounds
LysoPE(20:5(5Z,8Z,11Z,14Z,17Z)/0:0)	metab_3810	-	-	-	HMDB0011519	pos	-	-	-	-	Lipids and lipid-like molecules	Glycerophospholipids	500.273	M+H	C25H42NO7P	8.5113	0.00823585	45	-	-8.79162	-	Glycerophosphoethanolamines
LysoPE(18:2(9Z,12Z)/0:0)	metab_3811	-	-	-	HMDB0011507	pos	-	-	-	-	Lipids and lipid-like molecules	Glycerophospholipids	478.291	M+H	C23H44NO7P	8.5113	0.0106527	37.5	-	-3.80881	85046-18-0	Glycerophosphoethanolamines
Pregnanetriol	metab_3812	-	-	-	HMDB0006070	pos	-	-	-	-	Lipids and lipid-like molecules	Steroids and steroid derivatives	337.272	M+H	C21H36O3	8.5113	0.00423949	-	72.8	-4.51112	27178-64-9	Pregnane steroids
2-amino-14,16-dimethyloctadecan-3-ol	metab_3845	-	-	-	LMSP01080031	pos	-	-	-	-	-	-	314.34	M+H	C20H43NO	8.2958	0.0286345	55.7	-	-4.41241	-	-
(4E,8E,10E-d18:3)sphingosine	metab_3867	-	-	-	LMSP01080013	pos	-	-	-	-	-	-	296.257	M+H	C18H33NO2	8.0823	0.0137563	32.2	-	-3.86176	-	-
Phthalic anhydride	metab_3868	-	-	-	-	pos	-	-	-	-	-	-	190.049	M+ACN+H	C8H4O3	8.0823	0.0261614	58.4	-	-4.94104	-	-
(+)-4,11-Eudesmadien-3-one	metab_3877	-	-	-	HMDB0037061	pos	-	-	-	-	Lipids and lipid-like molecules	Prenol lipids	219.173	M+H	C15H22O	8.0397	0.00776099	60.5	-	-3.87751	473-08-5	Sesquiterpenoids
Eicosanoyl-EA	metab_3899	-	-	-	LMFA08040038	pos	-	-	-	-	-	-	356.351	M+H	C22H45NO2	7.845	0.032165	60.8	-	-4.31716	-	-
Buddledin A	metab_3906	-	-	C09623	-	pos	-	-	-	-	-	-	277.179	M+H	C17H24O3	7.802	0.0291367	67.4	-	-3.83344	-	-
Curcumanolide A	metab_3910	-	-	-	HMDB0033252	pos	-	-	-	-	Lipids and lipid-like molecules	Prenol lipids	235.168	M+H	C15H22O2	7.7803	0.000348298	36.7	-	-3.93551	97550-04-4	Terpene lactones
Dodecanoic acid	metab_3911	map01100;map01110;map00061;map00100	Metabolic pathways; Biosynthesis of secondary metabolites; Fatty acid biosynthesis; Steroid biosynthesis	C02530;C02679	LMFA01010012;HMDB0000638	pos	-;Lipids	-;Fatty acids	Metabolism;Metabolism;Metabolism;Metabolism	Global and overview maps;Global and overview maps;Lipid metabolism;Lipid metabolism	Lipids and lipid-like molecules	Fatty Acyls	223.168	M+Na	C12H24O2	7.7803	0.00421805	-	50.2	7.55038	143-07-7	Fatty acids and conjugates
Dihydrosphingosine	metab_3918	map00600;map01100	Sphingolipid metabolism; Metabolic pathways	C00836	LMSP01020001	pos	-	-	Metabolism;Metabolism	Lipid metabolism;Global and overview maps	-	-	284.294	M+H-H2O	C18H39NO2	7.6932	0.0154833	59.5	-	-3.66895	-	-
DEET	metab_3928	-	-	C10935	-	pos	-	-	-	-	-	-	174.127	M+H-H2O	C12H17NO	7.6299	0.0134295	30.5	-	-3.07415	-	-
N-despropyl ropinirole	metab_3974	-	-	-	HMDB0060625	pos	-	-	-	-	Organoheterocyclic compounds	Indoles and derivatives	478.32	2M+ACN+H	C13H18N2O	7.0026	0.010088	-	46.2	4.65015	-	Indolines
Pectachol	metab_3977	-	-	-	HMDB0039064	pos	-	-	-	-	Phenylpropanoids and polyketides	Coumarins and derivatives	460.267	M+NH4	C26H34O6	6.9592	0.0563897	-	59.5	-4.51164	81729-14-8	Not Available
2-Indanone	metab_3990	-	-	C07727	-	pos	-	-	-	-	-	-	133.064	M+H	C9H8O	6.9592	0.00579933	62.3	-	-3.48442	-	-
Alpha-Methylstyrene	metab_3991	-	-	C14395	HMDB0059899	pos	-	-	-	-	Benzenoids	Benzene and substituted derivatives	119.085	M+H	C9H10	6.9592	0.00469052	50.7	-	-1.08833	-	Phenylpropenes
Polyoxyethylene 40 monostearate	metab_3992	-	-	-	HMDB0032477	pos	-	-	-	-	Lipids and lipid-like molecules	Fatty Acyls	346.33	M+NH4	C20H40O3	6.9373	0.0174334	-	50.7	-4.06466	9004-99-3	Fatty acid esters
(-)-Carvomenthone	metab_3994	-	-	-	HMDB0034969	pos	-	-	-	-	Lipids and lipid-like molecules	Prenol lipids	172.169	M+NH4	C10H18O	6.9373	0.00824116	-	34.4	-4.43505	13163-73-0	Monoterpenoids
(5alpha,6beta,14alpha,20R,22R)-5,6,14,20,27-Pentahydroxy-1-oxowith-24-enolide	metab_3998	-	-	-	HMDB0033198	pos	-	-	-	-	Lipids and lipid-like molecules	Steroids and steroid derivatives	529.275	M+Na	C28H42O8	6.8946	0.0308333	-	34.7	-4.45574	222609-97-4	Steroid lactones
Pelargonidin 3-sophoroside	metab_4026	map00942	Anthocyanin biosynthesis	C16305	LMPK12010018;HMDB0033679	pos	-	-	Metabolism	Biosynthesis of other secondary metabolites	Phenylpropanoids and polyketides	Flavonoids	616.174	M+Na	C28H33O14+	6.614	0.00888534	-	87.9	-3.77379	54542-60-8	Flavonoid glycosides
C17 Sphinganine	metab_4031	-	-	-	LMSP01040003	pos	-	-	-	-	-	-	288.288	M+H	C17H37NO2	6.5721	0.0313856	57	-	-4.29294	-	-
16-Hydroxy hexadecanoic acid	metab_4043	map01100;map00073	Metabolic pathways; Cutin, suberine and wax biosynthesis	C18218	HMDB0006294	pos	-	-	Metabolism;Metabolism	Global and overview maps;Lipid metabolism	Lipids and lipid-like molecules	Fatty Acyls	290.268	M+NH4	C16H32O3	6.3774	0.00434906	-	77.1	-4.62303	-	Fatty acids and conjugates
Clausarinol	metab_4050	-	-	-	HMDB0041407	pos	-	-	-	-	Phenylpropanoids and polyketides	Coumarins and derivatives	432.236	M+NH4	C24H30O6	6.3351	0.125368	-	55.7	-4.28604	-	Pyranocoumarins
Styrene	metab_4060	map01100	Metabolic pathways	C07083;C19506	HMDB0034240	pos	-	-	Metabolism	Global and overview maps	Benzenoids	Benzene and substituted derivatives	105.07	M+H	C8H8	6.3351	0.0130088	61.5	-	1.06275	100-42-5	Styrenes
11-Hydroxy-9-tridecenoic acid	metab_4085	-	-	-	HMDB0035881;LMFA01050437	pos	-	-	-	-	Lipids and lipid-like molecules	Fatty Acyls	229.179	M+H	C13H24O3	6.0767	0.0133078	31.7	-	-3.78781	105798-56-9	Fatty acids and conjugates
2-Methyl-1,3-cyclohexadiene	metab_4093	-	-	-	HMDB0032395	pos	-	-	-	-	Hydrocarbons	Unsaturated hydrocarbons	95.0858	M+H	C7H10	6.0767	0.00204253	37.9	-	3.0348	1489-57-2	Branched unsaturated hydrocarbons
4-Vinylcyclohexene	metab_4094	-	-	C19310	-	pos	-	-	-	-	-	-	109.101	M+H	C8H12	6.0767	0.00169046	39.7	-	0.62753	-	-
Myristoleic acid	metab_4115	-	-	C08322	LMFA01030051;HMDB0002000	pos	-	-	-	-	Lipids and lipid-like molecules	Fatty Acyls	268.226	M+ACN+H	C14H26O2	5.7926	0.0406923	-	51.6	-5.0068	544-64-9	Fatty acids and conjugates
2,2,6,7-Tetramethylbicyclo[4.3.0]nona-1(9),4-diene-7,8-diol	metab_4116	-	-	-	HMDB0036686	pos	-	-	-	-	Organic oxygen compounds	Organooxygen compounds	226.179	M+NH4	C13H20O2	5.7926	0.00523942	-	41.4	-4.51301	99901-24-3	Alcohols and polyols
Cyclo	metab_4152	-	-	-	-	pos	-	-	-	-	-	-	175.122	M+H-2H2O	C11H18N2O2	5.3587	0.00817408	41.3	-	-2.8947	-	-
1-Hexanol	metab_4160	-	-	C00854	HMDB0012971	pos	-	-	-	-	Lipids and lipid-like molecules	Fatty Acyls	246.242	2M+ACN+H	C6H14O	5.2716	0.0169232	-	54.4	-4.665	111-27-3	Fatty alcohols
3,6,7-Trihydroxy-4'-methoxyflavone 7-rhamnoside	metab_4161	-	-	-	HMDB0041455;LMPK12111586	pos	-	-	-	-	Phenylpropanoids and polyketides	Flavonoids	429.116	M+H-H2O	C22H22O10	5.2494	0.00716995	-	47.9	-3.88264	-	Flavonoid glycosides
Butyl glucosinolate	metab_4170	-	-	-	HMDB0038426	pos	-	-	-	-	Organic oxygen compounds	Organooxygen compounds	398.053	M+Na	C11H21NO9S2	5.1624	0.0334783	-	48.1	-5.44491	35535-42-3	Carbohydrates and carbohydrate conjugates
Ramentaceone	metab_4174	-	-	C10398	-	pos	-	-	-	-	-	-	189.054	M+H	C11H8O3	5.1404	0.0139056	46	-	-3.37259	-	-
2,3-Dihydroxy-2'-carboxybiphenyl	metab_4176	map01100	Metabolic pathways	C16263	-	pos	-	-	Metabolism	Global and overview maps	-	-	231.064	M+H	C13H10O4	5.1404	0.00637037	61.8	-	-3.20515	-	-
N-Acetyl-5-methoxykynuramine	metab_4178	-	-	-	HMDB0062497	pos	-	-	-	-	Organic oxygen compounds	Organooxygen compounds	275.08	M+K	C12H16N2O3	5.1404	0.00720048	-	32.6	3.99095	52450-39-2	Carbonyl compounds
3,4,5-trihydroxy-6-[(3-methylbut-2-enoyl)oxy]oxane-2-carboxylic acid	metab_4197	-	-	-	HMDB0128920	pos	-	-	-	-	-	-	259.08	M+H-H2O	C11H16O8	5.0313	0.0384767	-	37.3	-3.88116	-	-
Heteroxanthin	metab_4205	map01100;map01110;map00232	Metabolic pathways; Biosynthesis of secondary metabolites; Caffeine metabolism	C16353	HMDB0036873	pos	-	-	Metabolism;Metabolism;Metabolism	Global and overview maps;Global and overview maps;Biosynthesis of other secondary metabolites	Lipids and lipid-like molecules	Prenol lipids	664.439	M+ACN+Na	C40H56O4	4.9433	0.0288884	-	68.7	8.89511	29488-00-4	Triterpenoids
Demissine	metab_4225	-	-	C10803	HMDB0034205	pos	-	-	-	-	Lipids and lipid-like molecules	Steroids and steroid derivatives	520.772	M+H+Na	C50H83NO20	4.701	0.0036802	-	36.2	-3.80598	6077-69-6	Steroidal glycosides
Gamma-Chaconine	metab_4226	-	-	-	HMDB0033678	pos	-	-	-	-	Organic oxygen compounds	Organooxygen compounds	592.418	M+CH3OH+H	C33H53NO6	4.6788	0.0101203	-	84.2	-4.36236	511-36-4	Carbohydrates and carbohydrate conjugates
Solanidine	metab_4227	-	-	C06543	HMDB0003236;LMST01150007	pos	-	-	-	-	Lipids and lipid-like molecules	Steroids and steroid derivatives	430.366	M+CH3OH+H	C27H43NO	4.6788	0.00276458	-	71.4	-4.23466	80-78-4	Steroidal alkaloids
Eriodictyol	metab_4232	map01100;map00941;map01110	Metabolic pathways; Flavonoid biosynthesis; Biosynthesis of secondary metabolites	C05631	HMDB0005810;LMPK12140002	pos	-	-	Metabolism;Metabolism;Metabolism	Global and overview maps;Biosynthesis of other secondary metabolites;Global and overview maps	Phenylpropanoids and polyketides	Flavonoids	289.07	M+H	C15H12O6	4.6566	0.00507435	57.9	-	-4.00533	552-58-9	Flavans
Eremopetasidione	metab_4233	-	-	-	HMDB0040778	pos	-	-	-	-	Lipids and lipid-like molecules	Prenol lipids	201.127	M+H-2H2O	C14H20O3	4.6566	0.0319555	-	60.6	-3.21229	163135-94-2	Sesquiterpenoids
Genistein	metab_4237	map01100;map01110	Metabolic pathways; Biosynthesis of secondary metabolites	C09126;C06563	LMPK12050218;HMDB0003217	pos	-	-	Metabolism;Metabolism	Global and overview maps;Global and overview maps	Phenylpropanoids and polyketides	Isoflavonoids	271.059	M+H	C15H10O5	4.6347	0.0556823	65.9	-	-4.12494	446-72-0	Isoflav-2-enes
2-hydroxymexiletine	metab_4244	-	-	-	HMDB0060953	pos	-	-	-	-	Benzenoids	Phenol ethers	160.112	M+H-2H2O	C11H17NO2	4.5907	0.042447	-	34.1	-2.75111	-	Not Available
9'-desmethylgranisetron	metab_4249	-	-	-	HMDB0061061	pos	-	-	-	-	Organoheterocyclic compounds	Benzopyrazoles	331.215	M+CH3OH+H	C17H22N4O	4.5039	0.0290644	-	61	8.75711	-	Indazoles
Macrocin	metab_4270	map01100;map01110	Metabolic pathways; Biosynthesis of secondary metabolites	C00744	-	pos	-	-	Metabolism;Metabolism	Global and overview maps;Global and overview maps	-	-	902.506	M+H	C45H75NO17	4.3773	0.0107009	60.1	-	-5.27102	-	-
Lycoperoside D	metab_4271	-	-	-	HMDB0034484	pos	-	-	-	-	Lipids and lipid-like molecules	Steroids and steroid derivatives	740.454	M+H	C39H65NO12	4.3773	0.00201341	63.2	-	-4.73516	81037-16-3	Steroidal glycosides
Camelledionol	metab_4276	-	-	-	HMDB0035730	pos	-	-	-	-	Lipids and lipid-like molecules	Prenol lipids	458.361	M+NH4	C29H44O3	4.3773	0.0341274	-	65.7	-4.73344	81426-90-6	Triterpenoids
Isopropyl beta-D-glucoside	metab_4284	-	-	-	HMDB0032705	pos	-	-	-	-	Organic oxygen compounds	Organooxygen compounds	223.117	M+H	C9H18O6	4.3773	0.00706853	-	33.9	-4.14521	5391-17-3	Carbohydrates and carbohydrate conjugates
Neuromedin B	metab_4308	-	-	C15865	HMDB0013018	pos	-	-	-	-	Organic acids and derivatives	Carboxylic acids and derivatives	588.757	M+2Na	C52H73N15O12S	4.2468	0.00738591	-	52.8	5.86052	87096-84-2	Amino acids, peptides, and analogues
1-Linoleoylglycerophosphocholine	metab_4309	-	-	C04100	HMDB0061692	pos	-	-	-	-	Lipids and lipid-like molecules	Glycerophospholipids	576.387	M+ACN+H	C27H53NO7P+	4.2468	0.00728816	-	67.8	-5.18965	-	Glycerophosphocholines
23-Acetoxysoladulcidine	metab_4314	-	-	-	HMDB0031402	pos	-	-	-	-	Lipids and lipid-like molecules	Steroids and steroid derivatives	474.356	M+H	C29H47NO4	4.2468	0.0168373	61.2	-	-3.95111	152128-85-3	Steroidal alkaloids
Rocuronium	metab_4332	-	-	C07556	HMDB0014866	pos	-	-	-	-	Lipids and lipid-like molecules	Steroids and steroid derivatives	574.372	M+2Na-H	C32H53N2O4+	4.1583	0.0127421	-	85	-0.265316	119302-91-9	Steroid esters
25-Hydroxyvitamin D3-26,23-lactol	metab_4338	-	-	-	HMDB0060127	pos	-	-	-	-	Lipids and lipid-like molecules	Steroids and steroid derivatives	472.34	M+ACN+H	C27H42O4	4.136	0.03664	-	90.3	-4.10561	-	Vitamin D and derivatives
4-Propylphenol	metab_4355	-	-	C14311	HMDB0032625	pos	-	-	-	-	Benzenoids	Benzene and substituted derivatives	137.096	M+H	C9H12O	4.07	0.0131487	40.7	-	-3.16714	645-56-7	Phenylpropanes
P-Mentha-1,3,5,8-tetraene	metab_4356	-	-	-	HMDB0029641	pos	-	-	-	-	Benzenoids	Benzene and substituted derivatives	133.101	M+H	C10H12	4.07	0.0140477	56	-	-2.79223	1195-32-0	Phenylpropenes
Jurubine	metab_4368	-	-	-	HMDB0034194;LMST01070002	pos	-	-	-	-	Lipids and lipid-like molecules	Steroids and steroid derivatives	578.403	M+H-H2O	C33H57NO8	3.9813	0.00423649	-	95.9	-3.81779	14256-61-2	Steroidal glycosides
(+/-)-Dihydromintlactone	metab_4371	-	-	-	HMDB0032219	pos	-	-	-	-	Organoheterocyclic compounds	Benzofurans	400.243	2M+ACN+Na	C10H16O2	3.9813	0.00771011	-	54.2	-9.38164	92015-65-1	Not Available
L-Histidinol	metab_4384	map01100;map00340;map01110;map01230	Metabolic pathways; Histidine metabolism; Biosynthesis of secondary metabolites; Biosynthesis of amino acids	C00860	HMDB0003431	pos	-	-	Metabolism;Metabolism;Metabolism;Metabolism	Global and overview maps;Amino acid metabolism;Global and overview maps;Global and overview maps	Organic nitrogen compounds	Organonitrogen compounds	142.097	M+H	C6H11N3O	3.9147	0.0221021	42.9	-	-3.25623	4836-52-6	Amines
3-p-Coumaroyl-1,5-quinolactone	metab_4396	-	-	-	HMDB0029292	pos	-	-	-	-	Phenylpropanoids and polyketides	Cinnamic acids and derivatives	285.075	M+H-2H2O	C16H16O7	3.8705	0.012279	-	45.9	-3.42966	-	Hydroxycinnamic acids and derivatives
Calcipotriol	metab_4416	-	-	-	HMDB0015567	pos	-	-	-	-	Lipids and lipid-like molecules	Steroids and steroid derivatives	430.33	M+NH4	C27H40O3	3.8037	0.00529458	-	85.1	-4.09023	112965-21-6	Vitamin D and derivatives
Ganodermic acid P2	metab_4426	-	-	-	HMDB0035292	pos	-	-	-	-	Lipids and lipid-like molecules	Prenol lipids	588.387	M+NH4	C34H50O7	3.7819	0.0102056	-	67.8	-4.19698	112430-69-0	Triterpenoids
Niazinin A	metab_4431	-	-	-	HMDB0031942	pos	-	-	-	-	Organic oxygen compounds	Organooxygen compounds	385.145	M+ACN+H	C15H21NO6S	3.7597	0.0489117	-	72.2	7.41837	148152-07-2	Carbohydrates and carbohydrate conjugates
Spirotaccagenin	metab_4439	-	-	-	HMDB0034424	pos	-	-	-	-	Lipids and lipid-like molecules	Prenol lipids	488.335	M+ACN+H	C27H42O5	3.7157	0.0516634	-	63.1	-3.94146	-	Triterpenoids
OMDM-2	metab_4457	-	-	-	-	pos	-	-	-	-	-	-	432.346	M+H	C27H45NO3	3.6497	0.0147076	82.3	-	-3.80379	-	-
Dolineone	metab_4489	-	-	-	LMPK12060008;HMDB0034039	pos	-	-	-	-	Phenylpropanoids and polyketides	Isoflavonoids	695.11	2M+Na	C19H12O6	3.5389	0.00470234	-	34.4	-8.94092	10065-28-8	Rotenoids
Oleandomycin triacetate	metab_4496	-	-	C12753	-	pos	-	-	-	-	-	-	814.454	M+H	C41H67NO15	3.5171	0.00976614	40.9	-	-4.77202	-	-
Amritoside	metab_4509	-	-	-	HMDB0034258	pos	-	-	-	-	Phenylpropanoids and polyketides	Tannins	325.056	M+H+Na	C26H26O18	3.5171	0.005897	-	35.5	5.78499	2455-85-8	Hydrolyzable tannins
Undecanedioic acid	metab_4574	-	-	-	LMFA01170007;HMDB0000888	pos	-	-	-	-	Lipids and lipid-like molecules	Fatty Acyls	258.169	M+ACN+H	C11H20O4	3.3186	0.000710193	-	79.3	-4.22189	1852-04-6	Fatty acids and conjugates
PE(18:4(6Z,9Z,12Z,15Z)/18:4(6Z,9Z,12Z,15Z))	metab_4576	-	-	-	HMDB0009195;LMGP02010754	pos	-	-	-	-	Lipids and lipid-like molecules	Glycerophospholipids	696.435	M+H-2H2O	C41H66NO8P	3.2963	0.0187873	-	68.1	-5.65515	-	Glycerophosphoethanolamines
Verbasoside	metab_4591	-	-	-	HMDB0039233	pos	-	-	-	-	Organic oxygen compounds	Organooxygen compounds	427.156	M+H-2H2O	C20H30O12	3.2296	0.0123169	-	38.3	-8.81301	61548-34-3	Carbohydrates and carbohydrate conjugates
2,3-Butanediol apiosylglucoside	metab_4604	-	-	-	HMDB0033063	pos	-	-	-	-	Organic oxygen compounds	Organooxygen compounds	423.124	M+K	C15H28O11	3.2071	0.0160731	-	71.4	-5.09998	-	Carbohydrates and carbohydrate conjugates
Quercetin 3-O-glucoside	metab_4612	map01100;map01110;map00944	Metabolic pathways; Biosynthesis of secondary metabolites; Flavone and flavonol biosynthesis	C05623	-	pos	-	-	Metabolism;Metabolism;Metabolism	Global and overview maps;Global and overview maps;Biosynthesis of other secondary metabolites	-	-	465.101	M+H	C21H20O12	3.1853	0.00995416	89	-	-3.62813	-	-
Asperuloside	metab_4617	map01110;map00902	Biosynthesis of secondary metabolites; Monoterpenoid biosynthesis	C09769	-	pos	-	-	Metabolism;Metabolism	Global and overview maps;Metabolism of terpenoids and polyketides	-	-	437.104	M+Na	C18H22O11	3.1853	0.0377909	39	-	-3.68843	-	-
L-Proline	metab_4640	map01100;map01110;map02010;map00330;map01230;map00970	Metabolic pathways; Biosynthesis of secondary metabolites; ABC transporters; Arginine and proline metabolism; Biosynthesis of amino acids; Aminoacyl-tRNA biosynthesis	C00148	HMDB0000162	pos	Peptides	Amino acids	Metabolism;Metabolism;Environmental Information Processing;Metabolism;Metabolism;Genetic Information Processing	Global and overview maps;Global and overview maps;Membrane transport;Amino acid metabolism;Global and overview maps;Translation	Organic acids and derivatives	Carboxylic acids and derivatives	116.071	M+H	C5H9NO2	3.0966	0.00713768	33.9	-	-0.371805	147-85-3	Amino acids, peptides, and analogues
Gibberellin A37 glucosyl ester	metab_4655	-	-	-	HMDB0038611	pos	-	-	-	-	Lipids and lipid-like molecules	Prenol lipids	547.198	M+K	C26H36O10	3.0086	0.0243892	-	47.2	7.20699	36702-72-4	Terpene glycosides
N-Acetyl gemifloxacin	metab_4656	-	-	-	HMDB0060633	pos	-	-	-	-	Organoheterocyclic compounds	Diazanaphthalenes	459.182	M+ACN+H	C19H20FN5O5	3.0086	0.0406649	-	56.1	7.85825	-	Naphthyridines
4-Ethylphenol	metab_4666	-	-	C13637	HMDB0029306	pos	-	-	-	-	Benzenoids	Phenols	123.08	M+H	C8H10O	2.9863	0.00155981	38.1	-	-1.31028	123-07-9	1-hydroxy-2-unsubstituted benzenoids
(±)-Jasmonic Acid	metab_4674	-	-	-	-	pos	-	-	-	-	-	-	211.132	M+H	C12H18O3	2.9419	0.0192217	75.8	-	-3.65721	-	-
Caryoptosidic acid	metab_4745	-	-	-	HMDB0034249	pos	-	-	-	-	Lipids and lipid-like molecules	Prenol lipids	357.114	M+H-2H2O	C16H24O11	2.721	0.0702088	-	30.4	-9.984	220271-92-1	Terpene glycosides
Arginyl-Glutamic acid	metab_4764	-	-	-	HMDB0028708	pos	-	-	-	-	Organic acids and derivatives	Carboxylic acids and derivatives	321.191	M+NH4	C11H21N5O5	2.6766	0.0124757	-	43.3	9.41051	-	Amino acids, peptides, and analogues
M-Coumaric acid	metab_4765	map01100;map00360	Metabolic pathways; Phenylalanine metabolism	C12621	HMDB0001713	pos	-	-	Metabolism;Metabolism	Global and overview maps;Amino acid metabolism	Phenylpropanoids and polyketides	Cinnamic acids and derivatives	165.054	M+H	C9H8O3	2.6766	0.00930906	73.2	-	-3.51371	588-30-7	Hydroxycinnamic acids and derivatives
ROSAVIN	metab_4800	-	-	-	-	pos	-	-	-	-	-	-	429.171	M+H	C20H28O10	2.6114	0.0123903	30.7	-	-9.63358	-	-
P-Octopamine	metab_4808	-	-	C04227	HMDB0004825	pos	-	-	-	-	Benzenoids	Phenols	136.075	M+H-H2O	C8H11NO2	2.6114	0.0115292	-	42.3	-2.64516	104-14-3	1-hydroxy-2-unsubstituted benzenoids
Phloroacetophenone 6'-[xylosyl-(1->6)-glucoside]	metab_4824	-	-	-	HMDB0032743	pos	-	-	-	-	Organic oxygen compounds	Organooxygen compounds	455.15	M+H-2H2O	C21H30O13	2.5468	0.0174632	-	72.6	-8.75452	87432-28-8	Carbohydrates and carbohydrate conjugates
4-Hydroxy-2,6,6-trimethyl-3-oxo-1,4-cyclohexadiene-1-carboxaldehyde	metab_4843	-	-	-	HMDB0037602	pos	-	-	-	-	Organic oxygen compounds	Organooxygen compounds	145.064	M+H-2H2O	C10H12O3	2.4829	0.0148181	-	41.2	-2.80838	35692-95-6	Carbonyl compounds
Feruloylagmatine	metab_4861	map01100;map00330	Metabolic pathways; Arginine and proline metabolism	C18325	-	pos	-	-	Metabolism;Metabolism	Global and overview maps;Amino acid metabolism	-	-	307.175	M+H	C15H22N4O3	2.4005	0.0155181	53	-	-4.00173	-	-
Monobutylphthalate	metab_4863	-	-	-	HMDB0013247	pos	-	-	-	-	Benzenoids	Benzene and substituted derivatives	261.054	M+K	C12H14O4	2.4005	0.031407	-	43.3	5.77489	131-70-4	Benzoic acids and derivatives
Betaine aldehyde	metab_4867	map01100;map00260	Metabolic pathways; Glycine, serine and threonine metabolism	C00576	HMDB0001252	pos	-	-	Metabolism;Metabolism	Global and overview maps;Amino acid metabolism	Organic nitrogen compounds	Organonitrogen compounds	147.063	M+2Na-H	C5H12NO+	2.4005	0.0050603	-	37.5	-2.09136	7418-61-3	Quaternary ammonium salts
4-formyl Indole	metab_4868	-	-	-	-	pos	-	-	-	-	-	-	146.06	M+H	C9H7NO	2.4005	0.000519534	99.4	-	-3.59501	-	-
5-Nonyltetrahydro-2-oxo-3-furancarboxylic acid	metab_4882	-	-	-	HMDB0030993	pos	-	-	-	-	Organoheterocyclic compounds	Lactones	274.2	M+NH4	C14H24O4	2.3584	0.0277045	-	36.6	-4.51698	-	Gamma butyrolactones
(-)-Corey Lactone Diol	metab_4886	-	-	-	-	pos	-	-	-	-	-	-	173.08	M+H	C8H12O4	2.3584	0.0213149	39.6	-	-2.8974	-	-
(S)-Argpyrimidine	metab_4896	-	-	-	HMDB0037180	pos	-	-	-	-	Organic acids and derivatives	Carboxylic acids and derivatives	277.129	M+Na	C11H18N4O3	2.3363	0.0148936	-	75.6	5.55259	-	Amino acids, peptides, and analogues
N-(4-aminobutyl)-3-(4-hydroxyphenyl)propanimidic acid	metab_4922	-	-	-	HMDB0139525	pos	-	-	-	-	-	-	254.185	M+NH4	C13H20N2O2	2.2921	0.0179883	-	60.4	-4.26329	-	-
Cucurbic acid	metab_4924	-	-	C08482	HMDB0029388	pos	-	-	-	-	Lipids and lipid-like molecules	Fatty Acyls	230.174	M+NH4	C12H20O3	2.2921	0.0150415	-	41.6	-3.82249	58240-50-9	Lineolic acids and derivatives
Deoxyinosine	metab_4925	map01100;map02010;map00230	Metabolic pathways; ABC transporters; Purine metabolism	C05512	HMDB0000071	pos	-	-	Metabolism;Environmental Information Processing;Metabolism	Global and overview maps;Membrane transport;Nucleotide metabolism	Nucleosides, nucleotides, and analogues	Purine nucleosides	217.071	M+H-2H2O	C10H12N4O4	2.2921	0.00603513	-	48.5	-3.0065	890-38-0	Purine 2''-deoxyribonucleosides
Coumarin	metab_4930	map00940;map01110	Phenylpropanoid biosynthesis; Biosynthesis of secondary metabolites	C05851	HMDB0001218	pos	-	-	Metabolism;Metabolism	Biosynthesis of other secondary metabolites;Global and overview maps	Phenylpropanoids and polyketides	Coumarins and derivatives	147.044	M+H	C9H6O2	2.2921	0.0160459	67.5	-	-3.33214	91-64-5	Not Available
Kinetin	metab_4936	-	-	C08272	HMDB0012245	pos	-	-	-	-	Organoheterocyclic compounds	Imidazopyrimidines	448.192	2M+NH4	C10H9N5O	2.2702	0.026473	-	38.6	-6.99958	525-79-1	Purines and purine derivatives
3-Hydroxytetradecanedioic acid	metab_4943	-	-	-	HMDB0000394	pos	-	-	-	-	Lipids and lipid-like molecules	Fatty Acyls	292.211	M+NH4	C14H26O5	2.2702	0.015415	-	43.8	-4.30159	73179-89-2	Fatty acids and conjugates
20-Hydroxy-leukotriene B4	metab_4966	map00590	Arachidonic acid metabolism	C04853	HMDB0001509	pos	-	-	Metabolism	Lipid metabolism	Lipids and lipid-like molecules	Fatty Acyls	416.237	M+ACN+Na	C20H32O5	2.226	0.0196352	-	30.1	-9.391	79516-82-8	Eicosanoids
CARBOFURAN	metab_5002	-	-	C14291	HMDB0031770	pos	-	-	-	-	Organoheterocyclic compounds	Coumarans	222.112	M+H	C12H15NO3	2.1591	0.00620643	44.5	-	-3.74145	1563-66-2	Not Available
Pantothenic Acid	metab_5003	map01100;map01110;map00770;map00410	Metabolic pathways; Biosynthesis of secondary metabolites; Pantothenate and CoA biosynthesis; beta-Alanine metabolism	C00864	HMDB0000210	pos	Vitamins and Cofactors	Vitamins	Metabolism;Metabolism;Metabolism;Metabolism	Global and overview maps;Global and overview maps;Metabolism of cofactors and vitamins;Metabolism of other amino acids	Organic oxygen compounds	Organooxygen compounds	220.117	M+H	C9H17NO5	2.1591	0.00161822	93.1	-	-3.61315	79-83-4	Alcohols and polyols
(E)-Casimiroedine	metab_5013	-	-	C10577	HMDB0030274	pos	-	-	-	-	Organic oxygen compounds	Organooxygen compounds	481.203	M+ACN+Na	C21H27N3O6	2.137	0.0155388	-	41.8	-7.49549	5853-02-01	Carbohydrates and carbohydrate conjugates
Neuromedin B (1-3)	metab_5035	-	-	-	HMDB0013016	pos	-	-	-	-	Organic acids and derivatives	Carboxylic acids and derivatives	347.13	M+2Na-H	C12H22N4O5	2.0936	0.0264963	-	36.2	-1.12909	-	Amino acids, peptides, and analogues
Taraxinic acid glucosyl ester	metab_5045	-	-	-	HMDB0035249	pos	-	-	-	-	Lipids and lipid-like molecules	Prenol lipids	469.144	M+2Na-H	C21H28O9	2.0719	0.0104181	-	57.8	-2.15476	75911-14-7	Terpene lactones
Chondroitin D-glucuronate	metab_5105	-	-	-	HMDB0060454	pos	-	-	-	-	Organic oxygen compounds	Organooxygen compounds	374.141	M+H-2H2O	C16H27NO11	2.0055	0.0205369	-	53.8	-9.37897	-	Carbohydrates and carbohydrate conjugates
6-O-Methylguanine	metab_5111	-	-	-	-	pos	-	-	-	-	-	-	166.072	M+H	C6H7N5O	2.0055	0.0125363	34.2	-	-3.27852	-	-
Indicaxanthin	metab_5139	-	-	C08549	HMDB0029386	pos	-	-	-	-	Organic acids and derivatives	Carboxylic acids and derivatives	166.049	M+H+Na	C14H16N2O6	1.895	0.0148938	-	35.2	4.35425	2181-75-1	Amino acids, peptides, and analogues
2,2-Dimethyloxirane	metab_5155	-	-	-	HMDB0034431	pos	-	-	-	-	Organoheterocyclic compounds	Epoxides	73.0654	M+H	C4H8O	1.873	0.0223642	67.8	-	8.32358	558-30-5	Not Available
Wampetin	metab_5171	-	-	-	HMDB0030080	pos	-	-	-	-	Phenylpropanoids and polyketides	Coumarins and derivatives	331.099	M+H-2H2O	C21H18O6	1.8065	0.0290761	-	53.5	5.77011	89824-26-0	Furanocoumarins
Buchananine	metab_5178	-	-	C10134	-	pos	-	-	-	-	-	-	286.091	M+H	C12H15NO7	1.7849	0.0474542	53.4	-	-4.05325	-	-
Hypoxanthine	metab_5191	map01100;map00230	Metabolic pathways; Purine metabolism	C00262	HMDB0000157	pos	-	-	Metabolism;Metabolism	Global and overview maps;Nucleotide metabolism	Organoheterocyclic compounds	Imidazopyrimidines	137.045	M+H	C5H4N4O	1.7627	0.0328102	35.7	-	-3.27288	68-94-0	Purines and purine derivatives
Piperidine	metab_5220	map00960	Tropane, piperidine and pyridine alkaloid biosynthesis	C01746	HMDB0034301	pos	-	-	Metabolism	Biosynthesis of other secondary metabolites	Organoheterocyclic compounds	Piperidines	86.0969	M+H	C5H11N	1.6968	0.0223007	40.4	-	5.15223	110-89-4	Not Available
P-Phenetidine	metab_5228	-	-	-	-	pos	-	-	-	-	-	-	138.091	M+H	C8H11NO	1.6754	0.0155724	34.6	-	-3.40699	-	-
Toluene	metab_5234	map01100	Metabolic pathways	C01455	HMDB0034168	pos	-	-	Metabolism	Global and overview maps	Benzenoids	Benzene and substituted derivatives	93.0702	M+H	C7H8	1.6754	0.010432	-	48.2	3.58903	108-88-3	Toluenes
4-Hydroxybenzaldehyde	metab_5259	map01100	Metabolic pathways	C00633	HMDB0011718	pos	-	-	Metabolism	Global and overview maps	Organic oxygen compounds	Organooxygen compounds	123.044	M+H	C7H6O2	1.6323	0.00419237	85.9	-	-1.43769	123-08-0	Carbonyl compounds
L-trans-alpha-Amino-2-carboxycyclopropaneacetic acid	metab_5272	-	-	-	HMDB0034442	pos	-	-	-	-	Organic acids and derivatives	Carboxylic acids and derivatives	160.06	M+H	C6H9NO4	1.6125	0.0175973	49.6	-	-3.71492	117857-93-9	Amino acids, peptides, and analogues
5-Fluorouridine	metab_5286	-	-	C16633	HMDB0060396	pos	-	-	-	-	Nucleosides, nucleotides, and analogues	Pyrimidine nucleosides	245.058	M+H-H2O	C9H11FN2O6	1.5942	0.0150936	-	74.9	4.69505	-	Not Available
Niacinamide	metab_5310	map01100;map00760	Metabolic pathways; Nicotinate and nicotinamide metabolism	C00153	HMDB0001406	pos	Vitamins and Cofactors	Vitamins	Metabolism;Metabolism	Global and overview maps;Metabolism of cofactors and vitamins	Organoheterocyclic compounds	Pyridines and derivatives	123.055	M+H	C6H6N2O	1.5942	0.0159527	72.5	-	-1.61358	98-92-0	Pyridinecarboxylic acids and derivatives
Thioacetamide	metab_5312	-	-	C19302	-	pos	-	-	-	-	-	-	76.022	M+H	C2H5NS	1.5942	0.0251312	89.3	-	6.39457	-	-
Aconitic acid	metab_5435	map01100;map00630;map01110;map01210;map00020;map00660	Metabolic pathways; Glyoxylate and dicarboxylate metabolism; Biosynthesis of secondary metabolites; 2-Oxocarboxylic acid metabolism; Citrate cycle (TCA cycle); C5-Branched dibasic acid metabolism	C00417;C02341	-	pos	Organic acids	Carboxylic acids	Metabolism;Metabolism;Metabolism;Metabolism;Metabolism;Metabolism	Global and overview maps;Carbohydrate metabolism;Global and overview maps;Global and overview maps;Carbohydrate metabolism;Carbohydrate metabolism	-	-	175.023	M+H	C6H6O6	1.4032	0.0751206	84.2	-	-3.35116	-	-
2-Amino-5-oxohexanoate	metab_5454	map01100;map00310	Metabolic pathways; Lysine degradation	C05825	-	pos	-	-	Metabolism;Metabolism	Global and overview maps;Amino acid metabolism	-	-	146.081	M+H	C6H11NO3	1.3827	0.0121993	32.8	-	-3.53392	-	-
L-Threonine	metab_5461	map01100;map01110;map00970;map00290;map02010;map00860;map01230;map00260;map00261	Metabolic pathways; Biosynthesis of secondary metabolites; Aminoacyl-tRNA biosynthesis; Valine, leucine and isoleucine biosynthesis; ABC transporters; Porphyrin and chlorophyll metabolism; Biosynthesis of amino acids; Glycine, serine and threonine metabolism; Monobactam biosynthesis	C00188	HMDB0000167	pos	Peptides	Amino acids	Metabolism;Metabolism;Genetic Information Processing;Metabolism;Environmental Information Processing;Metabolism;Metabolism;Metabolism;Metabolism	Global and overview maps;Global and overview maps;Translation;Amino acid metabolism;Membrane transport;Metabolism of cofactors and vitamins;Global and overview maps;Amino acid metabolism;Biosynthesis of other secondary metabolites	Organic acids and derivatives	Carboxylic acids and derivatives	120.065	M+H	C4H9NO3	1.3827	0.0310277	71.2	-	-1.02074	72-19-5	Amino acids, peptides, and analogues
Uracil	metab_5462	map00240;map01100;map00770;map00410	Pyrimidine metabolism; Metabolic pathways; Pantothenate and CoA biosynthesis; beta-Alanine metabolism	C00106	HMDB0000300	pos	Nucleic acids	Bases	Metabolism;Metabolism;Metabolism;Metabolism	Nucleotide metabolism;Global and overview maps;Metabolism of cofactors and vitamins;Metabolism of other amino acids	Organoheterocyclic compounds	Diazines	113.035	M+H	C4H4N2O2	1.3827	0.0207231	56.5	-	0.0169327	66-22-8	Pyrimidines and pyrimidine derivatives
5-Hydroxy-2-furoic acid	metab_5463	-	-	-	HMDB0059784	pos	-	-	-	-	Organoheterocyclic compounds	Furans	111.008	M+H-H2O	C5H4O4	1.3827	0.0167482	-	54.5	0.405958	-	Furoic acid and derivatives
Acetylhomoserine	metab_5478	-	-	-	HMDB0029423	pos	-	-	-	-	Organic acids and derivatives	Carboxylic acids and derivatives	162.075	M+H	C6H11NO4	1.3635	0.0636075	32.8	-	-3.80872	7540-67-2	Amino acids, peptides, and analogues
3-Buten-1-amine	metab_5482	-	-	C12244	-	pos	-	-	-	-	-	-	72.0814	M+H	C4H9N	1.3635	0.0480118	82.1	-	8.41838	-	-
2,3-Dimethyl-3-hydroxyglutaric acid	metab_5495	-	-	-	HMDB0002025	pos	-	-	-	-	Lipids and lipid-like molecules	Fatty Acyls	218.101	M+ACN+H	C7H12O5	1.3434	0.0117401	-	47.9	-4.73378	87764-48-5	Fatty acids and conjugates
L-Pipecolic acid	metab_5511	map01100;map00960;map00310;map01110	Metabolic pathways; Tropane, piperidine and pyridine alkaloid biosynthesis; Lysine degradation; Biosynthesis of secondary metabolites	C00408	HMDB0000716	pos	-	-	Metabolism;Metabolism;Metabolism;Metabolism	Global and overview maps;Biosynthesis of other secondary metabolites;Amino acid metabolism;Global and overview maps	Organic acids and derivatives	Carboxylic acids and derivatives	130.086	M+H	C6H11NO2	1.3434	0.0105071	40.2	-	-2.54291	3105-95-1	Amino acids, peptides, and analogues
L-2-Amino-3-methylenehexanoic acid	metab_5512	-	-	-	HMDB0030410	pos	-	-	-	-	Organic acids and derivatives	Carboxylic acids and derivatives	126.091	M+H-H2O	C7H13NO2	1.3434	0.0280274	-	41.8	-1.6491	29784-96-1	Amino acids, peptides, and analogues
(R)-b-amino-isobutyric acid	metab_5515	-	-	-	LMFA01100049	pos	-	-	-	-	-	-	104.071	M+H	C4H9NO2	1.3434	0.0062545	76.6	-	1.54121	-	-
Glycerol 2-phosphate	metab_5529	-	-	C02979	-	pos	-	-	-	-	-	-	173.02	M+H	C3H9O6P	1.3236	0.0542708	41.6	-	-3.47128	-	-
Quinone	metab_5533	-	-	C00472;C15602	HMDB0003364	pos	-	-	-	-	Organic oxygen compounds	Organooxygen compounds	109.028	M+H	C6H4O2	1.3236	0.0102464	64.7	-	0.482605	106-51-4	Carbonyl compounds
Sucrose	metab_5538	map01100;map00500;map01110;map02010;map00052	Metabolic pathways; Starch and sucrose metabolism; Biosynthesis of secondary metabolites; ABC transporters; Galactose metabolism	C00089	HMDB0000258	pos	Carbohydrates	Oligosaccharides	Metabolism;Metabolism;Metabolism;Environmental Information Processing;Metabolism	Global and overview maps;Carbohydrate metabolism;Global and overview maps;Membrane transport;Carbohydrate metabolism	Organic oxygen compounds	Organooxygen compounds	365.104	M+Na	C12H22O11	1.305	0.0106361	84.5	-	-4.34241	57-50-1	Carbohydrates and carbohydrate conjugates
Thiazolidine-4-carboxylic acid	metab_5550	-	-	-	-	pos	-	-	-	-	-	-	134.027	M+H	C4H7NO2S	1.305	0.0152281	45.6	-	-2.7447	-	-
2-Cyclopentene-1,4-dione	metab_5554	-	-	-	-	pos	-	-	-	-	-	-	97.0287	M+H	C5H4O2	1.305	0.0186667	75.5	-	2.71364	-	-
1-Amino-1-cyclopentanecarboxylic acid	metab_5555	-	-	C03969	-	pos	-	-	-	-	-	-	94.0654	M+H-2H2O	C6H11NO2	1.305	0.0288288	42.5	-	2.2691	-	-
Glucosinalbin 4-(4-acetylrhamnoside)	metab_5557	-	-	-	HMDB0036939	pos	-	-	-	-	Organic oxygen compounds	Organooxygen compounds	631.145	M+NH4	C22H31NO15S2	1.2855	0.019567	-	63.5	-3.14062	-	Carbohydrates and carbohydrate conjugates
Glycerophosphocholine	metab_5560	map00565;map00564	Ether lipid metabolism; Glycerophospholipid metabolism	C00670	HMDB0000086	pos	-	-	Metabolism;Metabolism	Lipid metabolism;Lipid metabolism	Lipids and lipid-like molecules	Glycerophospholipids	258.109	M+H	C8H20NO6P	1.2855	0.00584777	72.6	-	-4.03551	28319-77-9	Glycerophosphocholines
Choline	metab_5581	map01100;map00564;map02010;map00260	Metabolic pathways; Glycerophospholipid metabolism; ABC transporters; Glycine, serine and threonine metabolism	C00114	HMDB0000097	pos	-	-	Metabolism;Metabolism;Environmental Information Processing;Metabolism	Global and overview maps;Lipid metabolism;Membrane transport;Amino acid metabolism	Organic nitrogen compounds	Organonitrogen compounds	104.107	M+H	C5H13NO	1.2657	0.00956126	78.9	-	1.3132	62-49-7	Quaternary ammonium salts
2-Pyrrolidinone	metab_5583	-	-	C11118	HMDB0002039	pos	-	-	-	-	Organoheterocyclic compounds	Pyrrolidines	86.0604	M+H	C4H7NO	1.2657	0.0142761	68.9	-	4.77725	616-45-5	Pyrrolidones
L-Histidine	metab_5629	map01100;map01110;map00340;map02010;map01230;map00970;map00410	Metabolic pathways; Biosynthesis of secondary metabolites; Histidine metabolism; ABC transporters; Biosynthesis of amino acids; Aminoacyl-tRNA biosynthesis; beta-Alanine metabolism	C00135	HMDB0000177	pos	Peptides	Amino acids	Metabolism;Metabolism;Metabolism;Environmental Information Processing;Metabolism;Genetic Information Processing;Metabolism	Global and overview maps;Global and overview maps;Amino acid metabolism;Membrane transport;Global and overview maps;Translation;Metabolism of other amino acids	Organic acids and derivatives	Carboxylic acids and derivatives	156.076	M+H	C6H9N3O2	1.1846	0.018208	95.7	-	-3.2602	71-00-1	Amino acids, peptides, and analogues
4-Pyrimidine Methanamine (hydrochloride)	metab_5631	-	-	-	-	pos	-	-	-	-	-	-	110.071	M+H	C5H7N3	1.1846	0.0189916	46.1	-	0.318585	-	-
3-Hydroxy-4-aminopyridine sulfate	metab_5747	-	-	-	HMDB0061120	pos	-	-	-	-	Organic acids and derivatives	Organic sulfuric acids and derivatives	154.99	M+H-2H2O	C5H6N2O4S	0.0298	0.023996	-	42.8	-6.99831	-	Arylsulfates
Chlorogenic Acid	metab_5773	map00940;map00941;map01110;map00945	Phenylpropanoid biosynthesis; Flavonoid biosynthesis; Biosynthesis of secondary metabolites; Stilbenoid, diarylheptanoid and gingerol biosynthesis	C00852	HMDB0003164	neg	-	-	Metabolism;Metabolism;Metabolism;Metabolism	Biosynthesis of other secondary metabolites;Biosynthesis of other secondary metabolites;Global and overview maps;Biosynthesis of other secondary metabolites	Organic oxygen compounds	Organooxygen compounds	353.088	M-H, M+K-2H, M+Na-2H, 2M-H	C16H18O9	2.6286	0.0039646	72.3	-	-0.770193	327-97-9	Alcohols and polyols
Alpha-(1,2-Dihydroxyethyl)-1,2,3,4-tetrahydro-7-hydroxy-9-methoxy-3,4-dioxocyclopenta[c][1]benzopyran-6-acetaldehyde	metab_5792	-	-	C19592	HMDB0062442	neg	-	-	-	-	Phenylpropanoids and polyketides	Coumarins and derivatives	347.075	M-H, M+FA-H, M+Cl	C17H16O8	2.6953	0.0592508	-	34.6	-7.66285	-	Not Available
Camelliaside B	metab_5798	-	-	-	HMDB0038767;LMPK12111750	neg	-	-	-	-	Phenylpropanoids and polyketides	Flavonoids	725.193	M-H, M+Na-2H, M+Cl	C32H38O19	3.4277	0.000766081	-	81.1	-0.627458	131573-90-5	Flavonoid glycosides
Hv-NCC-1	metab_5803	-	-	-	HMDB0039005	neg	-	-	-	-	Organoheterocyclic compounds	Tetrapyrroles and derivatives	677.282	M-H, M+K-2H, M+Na-2H	C35H42N4O10	4.1628	0.0164149	-	69.5	-0.573482	135972-64-4	Not Available
3-Isopropylmalate	metab_5806	map01100;map01210;map01110;map01230;map00290	Metabolic pathways; 2-Oxocarboxylic acid metabolism; Biosynthesis of secondary metabolites; Biosynthesis of amino acids; Valine, leucine and isoleucine biosynthesis	C04411	HMDB0012156	neg	-	-	Metabolism;Metabolism;Metabolism;Metabolism;Metabolism	Global and overview maps;Global and overview maps;Global and overview maps;Global and overview maps;Amino acid metabolism	Lipids and lipid-like molecules	Fatty Acyls	351.129	M-H2O-H, M-H, 2M-H	C7H12O5	2.8506	0.00352507	-	33.8	-6.57387	921-28-8	Fatty acids and conjugates
2,3,4,6-tetrahydroxybenzaldehyde	metab_5811	-	-	-	HMDB0130402	neg	-	-	-	-	-	-	151.003	M-H2O-H, M-H, 2M-H	C7H6O5	5.1429	0.00845045	-	36.2	-6.82492	-	-
Benzyl O-[arabinofuranosyl-(1->6)-glucoside]	metab_5812	-	-	-	HMDB0041514	neg	-	-	-	-	Organic oxygen compounds	Organooxygen compounds	401.145	M-H, M+Cl, M+FA-H	C18H26O10	2.7397	0.00535985	-	71.7	-0.652271	88510-11-6	Carbohydrates and carbohydrate conjugates
Zizybeoside I	metab_5814	-	-	C17564	HMDB0034954	neg	-	-	-	-	Organic oxygen compounds	Organooxygen compounds	431.156	M-H, M+Cl, M+FA-H	C19H28O11	2.5406	0.0158298	-	32.6	-0.760504	76819-28-8	Carbohydrates and carbohydrate conjugates
Lepidimoic acid	metab_5822	-	-	-	HMDB0041096	neg	-	-	-	-	Organic oxygen compounds	Organooxygen compounds	643.172	M-H2O-H, M-H, 2M-H	C12H18O10	1.3344	0.00595667	-	82.7	-0.609409	157676-09-0	Carbohydrates and carbohydrate conjugates
Soyacerebroside I	metab_5825	-	-	-	HMDB0032677	neg	-	-	-	-	Lipids and lipid-like molecules	Sphingolipids	712.536	M-H, M+Cl, M+FA-H	C40H75NO9	11.0528	0.00914458	-	65.2	-0.796487	114297-20-0	Glycosphingolipids
Gluconic acid	metab_5835	map01100;map00030;map01110;map01200	Metabolic pathways; Pentose phosphate pathway; Biosynthesis of secondary metabolites; Carbon metabolism	C00257	HMDB0000625	neg	Carbohydrates	Monosaccharides	Metabolism;Metabolism;Metabolism;Metabolism	Global and overview maps;Carbohydrate metabolism;Global and overview maps;Global and overview maps	Organic oxygen compounds	Organooxygen compounds	195.05	M-H2O-H, M-H, M+Na-2H	C6H12O7	1.2783	0.00753486	47.3	-	-5.08473	526-95-4	Carbohydrates and carbohydrate conjugates
L-Glutamate	metab_5873	map01100;map00630;map00220;map01200;map00430;map01210;map00330;map02010;map00860;map00480;map01230;map00460;map00250;map00910;map00970;map00340;map01110;map00650;map00660	Metabolic pathways; Glyoxylate and dicarboxylate metabolism; Arginine biosynthesis; Carbon metabolism; Taurine and hypotaurine metabolism; 2-Oxocarboxylic acid metabolism; Arginine and proline metabolism; ABC transporters; Porphyrin and chlorophyll metabolism; Glutathione metabolism; Biosynthesis of amino acids; Cyanoamino acid metabolism; Alanine, aspartate and glutamate metabolism; Nitrogen met…	C00025;C00217;C00302	-	neg	Peptides;Hormones and transmitters;Peptides;-	Amino acids;Neurotransmitters;Amino acids;-	Metabolism;Metabolism;Metabolism;Metabolism;Metabolism;Metabolism;Metabolism;Environmental Information Processing;Metabolism;Metabolism;Metabolism;Metabolism;Metabolism;Metabolism;Genetic Information Processing;Metabolism;Metabolism;Metabolism;Metabolism	Global and overview maps;Carbohydrate metabolism;Amino acid metabolism;Global and overview maps;Metabolism of other amino acids;Global and overview maps;Amino acid metabolism;Membrane transport;Metabolism of cofactors and vitamins;Metabolism of other amino acids;Global and overview maps;Metabolism of other amino acids;Amino acid metabolism;Energy metabolism;Translation;Amino acid metabolism;Globa…	-	-	146.045	M-H2O-H, M-H	C5H9NO4	1.2581	0.0178632	48.2	-	-8.66852	-	-
Citric acid	metab_5896	map01100;map00630;map01110;map01210;map01200;map01230;map00250;map00020	Metabolic pathways; Glyoxylate and dicarboxylate metabolism; Biosynthesis of secondary metabolites; 2-Oxocarboxylic acid metabolism; Carbon metabolism; Biosynthesis of amino acids; Alanine, aspartate and glutamate metabolism; Citrate cycle (TCA cycle)	C00158	HMDB0000094	neg	Organic acids	Carboxylic acids	Metabolism;Metabolism;Metabolism;Metabolism;Metabolism;Metabolism;Metabolism;Metabolism	Global and overview maps;Carbohydrate metabolism;Global and overview maps;Global and overview maps;Global and overview maps;Global and overview maps;Amino acid metabolism;Carbohydrate metabolism	Organic acids and derivatives	Carboxylic acids and derivatives	191.019	M-H2O-H, M-H	C6H8O7	1.5906	0.00480346	67.6	-	-5.32898	77-92-9	Tricarboxylic acids and derivatives
Ethyl (S)-3-hydroxybutyrate glucoside	metab_5941	-	-	-	HMDB0031693	neg	-	-	-	-	Lipids and lipid-like molecules	Fatty Acyls	293.124	M-H, M+Na-2H	C12H22O8	2.253	0.00277939	-	38.1	-0.222164	-	Fatty acyl glycosides
Leonuriside A	metab_5944	-	-	-	HMDB0031721	neg	-	-	-	-	Organic oxygen compounds	Organooxygen compounds	331.103	M-H2O-H, M-H	C14H20O9	2.2753	0.0412283	-	34	-0.278783	121748-12-7	Carbohydrates and carbohydrate conjugates
3-(4-hydroxyphenyl)-2-(sulfooxy)propanoic acid	metab_5947	-	-	-	HMDB0132292	neg	-	-	-	-	-	-	261.007	M-H, M+Na-2H	C9H10O7S	2.2975	0.00465406	-	48.1	-0.792456	-	-
Gallic acid	metab_5957	-	-	C01424	HMDB0005807	neg	-	-	-	-	Benzenoids	Benzene and substituted derivatives	169.013	M-H2O-H, M-H	C7H6O5	2.3863	0.00809535	38.6	-	-6.52989	149-91-7	Benzoic acids and derivatives
Acetyl-DL-Valine	metab_5964	-	-	-	-	neg	-	-	-	-	-	-	158.081	M-H, M+Na-2H	C7H13NO3	2.5184	0.00295288	68.8	-	-6.7863	-	-
CMPF	metab_5977	-	-	-	-	neg	-	-	-	-	-	-	239.092	M-H2O-H, M-H	C12H16O5	2.7175	0.00787279	65.2	-	-2.47514	-	-
1-Oleoyl Lysophosphatidic Acid (sodium salt)	metab_5985	-	-	-	-	neg	-	-	-	-	-	-	435.251	M-H, M+Na-2H	C21H41O7P	10.2477	0.0357201	31.6	-	-0.648474	-	-
PE(15:0/22:2(13Z,16Z))	metab_5996	-	-	-	HMDB0008909;LMGP02010471	neg	-	-	-	-	Lipids and lipid-like molecules	Glycerophospholipids	802.56	M+Cl, M+FA-H	C42H80NO8P	11.4571	0.0145235	-	69.8	-0.370817	-	Glycerophosphoethanolamines
Trans-p-Menthane-1,7,8-triol 8-glucoside	metab_6068	-	-	-	HMDB0034784	neg	-	-	-	-	Organic oxygen compounds	Organooxygen compounds	349.187	M-H2O-H, M-H	C16H30O8	3.2279	0.0094686	-	31.6	0.00955901	217962-29-3	Carbohydrates and carbohydrate conjugates
2-Carboxy-4-dodecanolide	metab_6082	-	-	-	HMDB0030987	neg	-	-	-	-	Organoheterocyclic compounds	Lactones	263.129	M+Na-2H, M+FA-H	C13H22O4	3.5838	0.0061801	-	45.2	9.10114	-	Gamma butyrolactones
N-Acetyl-DL-tryptophan	metab_6089	-	-	-	-	neg	-	-	-	-	-	-	245.093	M-H, M+Na-2H	C13H14N2O3	3.6505	0.00548472	69.2	-	-1.50063	-	-
1,3-Dicaffeoylquinic acid	metab_6103	-	-	C10445	HMDB0029279	neg	-	-	-	-	Organic oxygen compounds	Organooxygen compounds	515.119	M-H, M+Na-2H	C25H24O12	3.8508	0.00174393	71.7	-	-0.677729	19870-46-3	Alcohols and polyols
1,11-Undecanedicarboxylic acid	metab_6176	-	-	-	HMDB0002327	neg	-	-	-	-	Lipids and lipid-like molecules	Fatty Acyls	243.16	M-H2O-H, M-H	C13H24O4	6.6806	0.00816692	32.2	-	-2.21086	505-52-2	Fatty acids and conjugates
LPC(18:2)	metab_6206	-	-	-	-	neg	-	-	-	-	-	-	564.33	M+Cl, M+FA-H	C26H50NO7P	8.3843	0.00199451	82.1	-	-0.61426	-	-
D-Arabinono-1,4-lactone	metab_6216	-	-	C00652	-	neg	-	-	-	-	-	-	147.029	M-H, M+K-2H	C5H8O5	1.2977	0.00868595	44.8	-	-8.15262	-	-
L-Ribulose	metab_6217	map01100;map00040	Metabolic pathways; Pentose and glucuronate interconversions	C00310;C00508	HMDB0003371	neg	Carbohydrates	Monosaccharides	Metabolism;Metabolism	Global and overview maps;Carbohydrate metabolism	Organic oxygen compounds	Organooxygen compounds	149.044	M-H, M+Cl	C5H10O5	1.3161	0.00470578	31.9	-	-7.96087	2042-27-5	Carbohydrates and carbohydrate conjugates
L-Ascorbic acid	metab_6230	map01100;map00480;map01110;map00053	Metabolic pathways; Glutathione metabolism; Biosynthesis of secondary metabolites; Ascorbate and aldarate metabolism	C01041;C00072	-	neg	-;Vitamins and Cofactors	-;Vitamins	Metabolism;Metabolism;Metabolism;Metabolism	Global and overview maps;Metabolism of other amino acids;Global and overview maps;Carbohydrate metabolism	-	-	175.024	M-H2O-H, M-H	C6H8O6	1.3344	0.00936343	55.6	-	-6.6545	-	-
Tryptophyl-Aspartate	metab_6316	-	-	-	HMDB0029079	neg	-	-	-	-	Organic acids and derivatives	Carboxylic acids and derivatives	340.091	M+Na-2H	C15H17N3O5	1.2365	0.00856255	-	32.1	-0.315547	-	Amino acids, peptides, and analogues
6-ethoxy-3,4,5-trihydroxyoxane-2-carboxylic acid	metab_6336	-	-	-	HMDB0131286	neg	-	-	-	-	-	-	267.072	M+FA-H	C8H14O7	1.2977	0.00862054	-	78.2	-1.15398	-	-
Oxoglutaric acid	metab_6359	map01100;map00630;map00310;map01110;map00300;map00650;map01210;map00340;map00040;map01200;map00220;map00053;map00250;map01230;map00020;map00660;map00430	Metabolic pathways; Glyoxylate and dicarboxylate metabolism; Lysine degradation; Biosynthesis of secondary metabolites; Lysine biosynthesis; Butanoate metabolism; 2-Oxocarboxylic acid metabolism; Histidine metabolism; Pentose and glucuronate interconversions; Carbon metabolism; Arginine biosynthesis; Ascorbate and aldarate metabolism; Alanine, aspartate and glutamate metabolism; Biosynthesis of a…	C00026	HMDB0000208	neg	Organic acids	Carboxylic acids	Metabolism;Metabolism;Metabolism;Metabolism;Metabolism;Metabolism;Metabolism;Metabolism;Metabolism;Metabolism;Metabolism;Metabolism;Metabolism;Metabolism;Metabolism;Metabolism;Metabolism	Global and overview maps;Carbohydrate metabolism;Amino acid metabolism;Global and overview maps;Amino acid metabolism;Carbohydrate metabolism;Global and overview maps;Amino acid metabolism;Carbohydrate metabolism;Global and overview maps;Amino acid metabolism;Carbohydrate metabolism;Amino acid metabolism;Global and overview maps;Carbohydrate metabolism;Carbohydrate metabolism;Metabolism of other …	Organic acids and derivatives	Keto acids and derivatives	145.013	M-H	C5H6O5	1.3344	0.035073	-	52.4	-8.21128	328-50-7	Gamma-keto acids and derivatives
Isocitrate	metab_6372	map01100;map00630;map01110;map01210;map01200;map01230;map00020	Metabolic pathways; Glyoxylate and dicarboxylate metabolism; Biosynthesis of secondary metabolites; 2-Oxocarboxylic acid metabolism; Carbon metabolism; Biosynthesis of amino acids; Citrate cycle (TCA cycle)	C00451;C00311	-	neg	-;Organic acids	-;Carboxylic acids	Metabolism;Metabolism;Metabolism;Metabolism;Metabolism;Metabolism;Metabolism	Global and overview maps;Carbohydrate metabolism;Global and overview maps;Global and overview maps;Global and overview maps;Global and overview maps;Carbohydrate metabolism	-	-	191.019	M-H	C6H8O7	1.396	0.00623855	64.3	-	-4.64931	-	-
UDP-D-apiose	metab_6381	map01100;map00520	Metabolic pathways; Amino sugar and nucleotide sugar metabolism	C01623	HMDB0012301	neg	-	-	Metabolism;Metabolism	Global and overview maps;Carbohydrate metabolism	Nucleosides, nucleotides, and analogues	Pyrimidine nucleotides	535.037	M-H	C14H22N2O16P2	1.4392	0.0157538	-	64.3	-0.696558	20230-91-5	Pyrimidine ribonucleotides
Acaciabiuronic acid	metab_6409	-	-	-	HMDB0029938	neg	-	-	-	-	Organic oxygen compounds	Organooxygen compounds	337.078	M-H2O-H	C12H20O12	1.569	0.196148	-	30.9	-0.28113	7264-19-9	Carbohydrates and carbohydrate conjugates
Pyroglutamic acid	metab_6413	map01100;map00480	Metabolic pathways; Glutathione metabolism	C02237;C01879	HMDB0000267	neg	-;Peptides	-;Amino acids	Metabolism;Metabolism	Global and overview maps;Metabolism of other amino acids	Organic acids and derivatives	Carboxylic acids and derivatives	128.034	M-H	C5H7NO3	1.633	0.017592	-	72.1	-9.94199	98-79-3	Amino acids, peptides, and analogues
Uridine	metab_6414	map00240;map01100;map02010	Pyrimidine metabolism; Metabolic pathways; ABC transporters	C00299	HMDB0000296	neg	Nucleic acids	Nucleosides	Metabolism;Metabolism;Environmental Information Processing	Nucleotide metabolism;Global and overview maps;Membrane transport	Nucleosides, nucleotides, and analogues	Pyrimidine nucleosides	243.062	M-H	C9H12N2O6	1.633	0.0181183	73.1	-	-1.47974	58-96-8	Not Available
N-Acetyl-L-alanine	metab_6432	-	-	-	HMDB0000766	neg	-	-	-	-	Organic acids and derivatives	Carboxylic acids and derivatives	130.05	M-H	C5H9NO3	1.7201	0.00494486	55.5	-	-9.74427	97-69-8	Amino acids, peptides, and analogues
N2-Succinyl-L-glutamic acid 5-semialdehyde	metab_6435	map01100;map00330	Metabolic pathways; Arginine and proline metabolism	C05932	HMDB0001180	neg	-	-	Metabolism;Metabolism	Global and overview maps;Amino acid metabolism	Organic acids and derivatives	Carboxylic acids and derivatives	230.066	M-H	C9H13NO6	1.7201	0.0108112	-	42.3	-2.24684	-	Amino acids, peptides, and analogues
Bis-gamma-glutamylcysteinylbis-beta-alanine	metab_6438	-	-	-	HMDB0029413	neg	-	-	-	-	Organic acids and derivatives	Peptidomimetics	685.183	M+FA-H	C22H36N6O12S2	1.7201	0.0403217	-	53.2	2.17961	-	Hybrid peptides
Galactosylglycerol	metab_6473	map00561;map00052	Glycerolipid metabolism; Galactose metabolism	C05401	HMDB0006790	neg	-	-	Metabolism;Metabolism	Lipid metabolism;Carbohydrate metabolism	Lipids and lipid-like molecules	Glycerolipids	275.077	M+Na-2H	C9H18O8	1.964	0.0153208	-	34	9.13442	-	Glycosylglycerols
Xanthine	metab_6476	map01100;map01110;map00230;map00232	Metabolic pathways; Biosynthesis of secondary metabolites; Purine metabolism; Caffeine metabolism	C00385	HMDB0000292	neg	-	-	Metabolism;Metabolism;Metabolism;Metabolism	Global and overview maps;Global and overview maps;Nucleotide metabolism;Biosynthesis of other secondary metabolites	Organoheterocyclic compounds	Imidazopyrimidines	151.025	M-H	C5H4N4O2	1.9862	0.0320373	42.3	-	-7.24266	69-89-6	Purines and purine derivatives
Xanthosine	metab_6480	map01100;map02010;map01110;map00230;map00232	Metabolic pathways; ABC transporters; Biosynthesis of secondary metabolites; Purine metabolism; Caffeine metabolism	C01762	HMDB0000299	neg	-	-	Metabolism;Environmental Information Processing;Metabolism;Metabolism;Metabolism	Global and overview maps;Membrane transport;Global and overview maps;Nucleotide metabolism;Biosynthesis of other secondary metabolites	Nucleosides, nucleotides, and analogues	Purine nucleosides	283.068	M-H	C10H12N4O6	1.9862	0.0284887	71	-	-0.367041	146-80-5	Not Available
L-Phenylalanine	metab_6518	map01100;map01110;map00970;map01210;map00960;map02010;map00998;map01230;map00966;map00460;map00940;map00360;map00400	Metabolic pathways; Biosynthesis of secondary metabolites; Aminoacyl-tRNA biosynthesis; 2-Oxocarboxylic acid metabolism; Tropane, piperidine and pyridine alkaloid biosynthesis; ABC transporters; Biosynthesis of various secondary metabolites - part 2; Biosynthesis of amino acids; Glucosinolate biosynthesis; Cyanoamino acid metabolism; Phenylpropanoid biosynthesis; Phenylalanine metabolism; Phenyla…	C00079	HMDB0000159	neg	Peptides	Amino acids	Metabolism;Metabolism;Genetic Information Processing;Metabolism;Metabolism;Environmental Information Processing;Metabolism;Metabolism;Metabolism;Metabolism;Metabolism;Metabolism;Metabolism	Global and overview maps;Global and overview maps;Translation;Global and overview maps;Biosynthesis of other secondary metabolites;Membrane transport;Biosynthesis of other secondary metabolites;Global and overview maps;Biosynthesis of other secondary metabolites;Metabolism of other amino acids;Biosynthesis of other secondary metabolites;Amino acid metabolism;Amino acid metabolism	Organic acids and derivatives	Carboxylic acids and derivatives	164.071	M-H	C9H11NO2	2.1195	0.00217897	62.8	-	-6.38636	63-91-2	Amino acids, peptides, and analogues
Kukoamine B	metab_6529	-	-	C17616	HMDB0060525	neg	-	-	-	-	Benzenoids	Phenols	529.303	M-H	C28H42N4O6	2.1417	0.0227625	-	41.9	-0.533548	-	Benzenediols
5-Methoxysalicylic acid	metab_6531	-	-	-	HMDB0001868	neg	-	-	-	-	Benzenoids	Benzene and substituted derivatives	167.034	M-H	C8H8O4	2.164	0.00231612	58.1	-	-5.96952	2612-02-04	Benzoic acids and derivatives
Isopentenyladenosine	metab_6536	-	-	-	-	neg	-	-	-	-	-	-	380.156	M+FA-H	C15H21N5O4	2.164	0.00600017	40	-	-4.62384	-	-
Botryodiplodin	metab_6559	-	-	-	HMDB0036594	neg	-	-	-	-	Organoheterocyclic compounds	Tetrahydrofurans	189.076	M+FA-H	C7H12O3	2.253	0.00650614	-	33.4	-5.91419	27098-03-9	Not Available
Hydroxyphenyllactic acid	metab_6572	-	-	C03672	HMDB0000755	neg	-	-	-	-	Phenylpropanoids and polyketides	Phenylpropanoic acids	181.05	M-H	C9H10O4	2.2975	0.00961505	35	-	-5.0418	306-23-0	Not Available
Lucuminic acid	metab_6606	-	-	-	HMDB0035007	neg	-	-	-	-	Organic oxygen compounds	Organooxygen compounds	491.14	M+FA-H	C19H26O12	2.4082	0.0194149	-	56.3	-0.566376	190323-48-9	Carbohydrates and carbohydrate conjugates
Gentisic acid	metab_6617	map01100;map00350	Metabolic pathways; Tyrosine metabolism	C00628	HMDB0000152	neg	-	-	Metabolism;Metabolism	Global and overview maps;Amino acid metabolism	Benzenoids	Benzene and substituted derivatives	153.018	M-H	C7H6O4	2.4527	0.00289441	69.2	-	-7.41901	490-79-9	Benzoic acids and derivatives
Flumioxazin	metab_6636	-	-	C11035	HMDB0034854	neg	-	-	-	-	Organoheterocyclic compounds	Benzoxazines	399.099	M+FA-H	C19H15FN2O4	2.4961	0.0106309	-	50.1	-0.855256	103361-09-7	Benzoxazinones
3,4-Dihydroxyphenylpropanoate	metab_6658	map00350	Tyrosine metabolism	C10447	-	neg	-	-	Metabolism	Amino acid metabolism	-	-	181.05	M-H	C9H10O4	2.6069	0.00498307	34.4	-	-5.04236	-	-
Homoveratric acid	metab_6659	-	-	-	HMDB0000434	neg	-	-	-	-	Benzenoids	Benzene and substituted derivatives	195.065	M-H	C10H12O4	2.6069	0.0100351	30.9	-	-5.00498	93-40-3	Methoxybenzenes
Domesticoside	metab_6660	-	-	-	HMDB0029647	neg	-	-	-	-	Organic oxygen compounds	Organooxygen compounds	343.103	M-H	C15H20O9	2.6069	0.00603174	-	42.5	-0.576816	24587-97-1	Carbohydrates and carbohydrate conjugates
Quinic acid	metab_6662	map01100;map00400	Metabolic pathways; Phenylalanine, tyrosine and tryptophan biosynthesis	C06746;C00296	HMDB0003072	neg	-	-	Metabolism;Metabolism	Global and overview maps;Amino acid metabolism	Organic oxygen compounds	Organooxygen compounds	191.055	M-H	C7H12O6	2.6286	0.00713323	54.5	-	-4.68868	77-95-2	Alcohols and polyols
Limocitrol	metab_6665	-	-	-	LMPK12113333;HMDB0037691	neg	-	-	-	-	Phenylpropanoids and polyketides	Flavonoids	411.046	M+Cl	C18H16O9	2.6286	0.00950948	-	65.7	-7.11986	549-10-0	Flavones
Shikimic acid	metab_6669	map01100;map00400;map01110;map01230	Metabolic pathways; Phenylalanine, tyrosine and tryptophan biosynthesis; Biosynthesis of secondary metabolites; Biosynthesis of amino acids	C00493	HMDB0003070	neg	-	-	Metabolism;Metabolism;Metabolism;Metabolism	Global and overview maps;Amino acid metabolism;Global and overview maps;Global and overview maps	Organic oxygen compounds	Organooxygen compounds	173.045	M-H	C7H10O5	2.6507	0.00802566	49.3	-	-5.64353	138-59-0	Alcohols and polyols
Coumaroyl Hexoside	metab_6680	-	-	-	-	neg	-	-	-	-	-	-	325.093	M-H	C15H18O8	2.6953	0.00221009	61.7	-	-0.441923	-	-
N-trans-Feruloyloctopamine	metab_6687	-	-	-	HMDB0032805	neg	-	-	-	-	Phenylpropanoids and polyketides	Cinnamic acids and derivatives	328.119	M-H	C18H19NO5	2.7397	0.00847743	-	60.6	-0.549054	66648-44-0	Hydroxycinnamic acids and derivatives
Isopropyl apiosylglucoside	metab_6723	-	-	-	HMDB0041513	neg	-	-	-	-	Organic oxygen compounds	Organooxygen compounds	335.135	M-H2O-H	C14H26O10	2.8948	0.0125816	-	36.5	-0.142277	147742-24-3	Carbohydrates and carbohydrate conjugates
Eremopetasitenin B2	metab_6733	-	-	-	HMDB0030901	neg	-	-	-	-	Phenylpropanoids and polyketides	2-arylbenzofuran flavonoids	445.171	M-H2O-H	C24H32O7S	2.9614	0.0139691	-	33.1	4.90031	189100-15-0	Not Available
(2R,6x)-7-Methyl-3-methylene-1,2,6,7-octanetetrol 2-glucoside	metab_6742	-	-	-	HMDB0033216	neg	-	-	-	-	Lipids and lipid-like molecules	Fatty Acyls	365.181	M-H	C16H30O9	3.0058	0.00422133	-	50.4	-0.784481	219814-32-1	Fatty acyl glycosides
Acetyl-DL-Leucine	metab_6794	-	-	C02710	-	neg	-	-	-	-	-	-	172.097	M-H	C8H15NO3	3.3167	0.00836703	50.5	-	-5.58642	-	-
(R)-Pelletierine	metab_6799	-	-	-	HMDB0030324	neg	-	-	-	-	Organoheterocyclic compounds	Piperidines	186.113	M+FA-H	C8H15NO	3.339	0.00742231	-	31.8	-6.30064	2858-66-4	Not Available
Etodolac acyl glucuronide	metab_6817	-	-	-	HMDB0060916	neg	-	-	-	-	Organic oxygen compounds	Organooxygen compounds	444.166	M-H2O-H	C23H29NO9	3.4056	0.0205662	-	62.3	-0.637253	-	Carbohydrates and carbohydrate conjugates
Phytyl diphosphate	metab_6826	map01100;map00130;map01110;map00900	Metabolic pathways; Ubiquinone and other terpenoid-quinone biosynthesis; Biosynthesis of secondary metabolites; Terpenoid backbone biosynthesis	C05427	LMPR0104010008;LMPR0104010017;HMDB0011116	neg	-	-	Metabolism;Metabolism;Metabolism;Metabolism	Global and overview maps;Metabolism of cofactors and vitamins;Global and overview maps;Metabolism of terpenoids and polyketides	Lipids and lipid-like molecules	Prenol lipids	493.193	M+K-2H	C20H42O7P2	3.4723	0.0853526	-	49	7.78618	-	Diterpenoids
Quercetin-3-O-rutinoside	metab_6831	-	-	-	-	neg	-	-	-	-	-	-	609.146	M-H	C27H30O16	3.5166	0.00814899	84.1	-	-0.359099	-	-
Dictyoquinazol B	metab_6857	-	-	-	HMDB0040441	neg	-	-	-	-	Organoheterocyclic compounds	Diazanaphthalenes	373.14	M+FA-H	C18H20N2O4	3.6727	0.00383555	-	74.8	-0.677706	-	Benzodiazines
(-)-Epigallocatechin 3-cinnamate	metab_6880	-	-	-	HMDB0038831	neg	-	-	-	-	Phenylpropanoids and polyketides	Flavonoids	917.235	2M+FA-H	C24H20O8	3.8064	0.00416781	-	55.1	6.48206	108907-46-6	Flavans
11-Methoxynoryangonin	metab_6884	-	-	-	HMDB0030754	neg	-	-	-	-	Phenylpropanoids and polyketides	Kavalactones	273.077	M-H	C15H14O5	3.8286	0.054163	-	64.3	-0.580698	77900-31-3	Not Available
Kaempferol 3-(6-[4-glucosyl-p-coumaryl]glucosyl)(1->2)-rhamnoside	metab_6911	-	-	-	HMDB0040476;LMPK12111898	neg	-	-	-	-	Phenylpropanoids and polyketides	Flavonoids	901.24	M-H	C42H46O22	4.0066	0.0479965	-	73.4	-0.521684	142997-34-0	Flavonoid glycosides
3-alpha-Androstanediol glucuronide	metab_6919	-	-	-	HMDB0010339;LMST05010039	neg	-	-	-	-	Alkaloids and derivatives	Morphinans	467.262	M-H	C25H40O8	4.0512	0.0241101	-	58.2	-6.55172	-	Not Available
Methyl nomilinate 17-glucoside	metab_6928	-	-	-	HMDB0039887	neg	-	-	-	-	Lipids and lipid-like molecules	Prenol lipids	707.293	M-H2O-H	C35H50O16	4.1182	0.00789521	-	73.5	1.46591	-	Terpene glycosides
2-Phenylethanol glucuronide	metab_6959	map01100;map00040	Metabolic pathways; Pentose and glucuronate interconversions	C03033	HMDB0010350	neg	-	-	Metabolism;Metabolism	Global and overview maps;Carbohydrate metabolism	Organic oxygen compounds	Organooxygen compounds	297.1	M-H	C14H18O7	4.3189	0.0140952	-	40.3	8.32964	-	Carbohydrates and carbohydrate conjugates
4-Nitrophenol	metab_6992	-	-	C06813;C00870	HMDB0001232;HMDB0062627	neg	-	-	-	-	Benzenoids	Phenols	138.018	M-H	C6H5NO3	4.4538	0.00366153	56.6	-	-8.7797	100-02-7	Nitrophenols
1-(2-Furanyl)-1-pentanone	metab_7018	-	-	-	HMDB0039801	neg	-	-	-	-	Organic oxygen compounds	Organooxygen compounds	151.075	M-H	C9H12O2	4.6543	0.0157512	-	31.8	-7.47331	3194-17-0	Carbonyl compounds
N-omega-Acetylhistamine	metab_7019	map00340	Histidine metabolism	C05135	-	neg	-	-	Metabolism	Amino acid metabolism	-	-	152.083	M-H	C7H11N3O	4.6543	0.0240446	43.5	-	1.42294	-	-
Gamma-CEHC	metab_7021	-	-	-	HMDB0001931	neg	-	-	-	-	Organoheterocyclic compounds	Benzopyrans	263.129	M-H	C15H20O4	4.6543	0.00912206	54.4	-	-0.717006	178167-75-4	1-benzopyrans
Dihydrokaempferol	metab_7022	map01100;map00941;map01110	Metabolic pathways; Flavonoid biosynthesis; Biosynthesis of secondary metabolites	C00974	-	neg	-	-	Metabolism;Metabolism;Metabolism	Global and overview maps;Biosynthesis of other secondary metabolites;Global and overview maps	-	-	309.038	M+Na-2H	C15H12O6	4.6543	0.0158681	50.4	-	-0.580242	-	-
HIERACIN	metab_7036	-	-	-	-	neg	-	-	-	-	-	-	301.035	M-H	C15H10O7	4.7874	0.00926714	59	-	-0.582463	-	-
Phomopsin A	metab_7042	-	-	C19955	HMDB0030447	neg	-	-	-	-	Organic acids and derivatives	Carboxylic acids and derivatives	809.251	M+Na-2H	C36H45ClN6O12	4.8321	0.0054768	-	39.4	-2.97032	64925-80-0	Amino acids, peptides, and analogues
Cis-Resveratrol	metab_7069	map01110;map00945	Biosynthesis of secondary metabolites; Stilbenoid, diarylheptanoid and gingerol biosynthesis	C03582	-	neg	-	-	Metabolism;Metabolism	Global and overview maps;Biosynthesis of other secondary metabolites	-	-	227.071	M-H	C14H12O3	5.1429	0.0121159	68.7	-	-2.33992	-	-
Osmundalactone	metab_7072	-	-	-	HMDB0031303	neg	-	-	-	-	Organoheterocyclic compounds	Pyrans	149.023	M+Na-2H	C6H8O3	5.1872	0.109194	-	47.9	9.61635	69308-39-0	Pyranones and derivatives
Perilloside A	metab_7080	-	-	-	HMDB0038706	neg	-	-	-	-	Lipids and lipid-like molecules	Prenol lipids	673.344	2M+FA-H	C16H26O6	5.2744	0.0469836	-	46	-0.54551	-	Terpene glycosides
5,7-dihydroxy-2-(4-hydroxyphenyl)-8-(3,4,5-trihydroxyoxan-2-yl)-4H-chromen-4-one	metab_7085	-	-	-	HMDB0127225	neg	-	-	-	-	-	-	401.088	M-H	C20H18O9	5.3634	0.0123695	-	65.1	-0.458195	-	-
Isotetrandrine	metab_7092	-	-	C17060	HMDB0030174	neg	-	-	-	-	Lignans, neolignans and related compounds	Not Available	643.277	M+Na-2H	C38H42N2O6	5.4745	0.00674969	-	49.9	-3.08698	477-57-6	Not Available
PSOROMIC ACID	metab_7098	-	-	-	-	neg	-	-	-	-	-	-	357.062	M-H	C18H14O8	5.5193	0.00952896	39.1	-	-0.242478	-	-
3''-O-Caffeoylcosmosiin	metab_7153	-	-	-	HMDB0037345	neg	-	-	-	-	Phenylpropanoids and polyketides	Flavonoids	593.13	M-H	C30H26O13	6.3454	0.0120442	-	39.8	-0.369467	79366-62-4	Flavonoid glycosides
Mupirocin	metab_7172	-	-	C11758	HMDB0014554	neg	-	-	-	-	Lipids and lipid-like molecules	Fatty Acyls	521.275	M+Na-2H	C26H44O9	6.5689	0.0550347	-	50.2	4.14098	12650-69-0	Fatty acids and conjugates
Hovenine A	metab_7184	-	-	-	HMDB0030200	neg	-	-	-	-	Organic acids and derivatives	Carboxylic acids and derivatives	507.296	M+Na-2H	C27H42N4O4	6.7699	0.000775051	-	46	1.72107	52309-78-1	Amino acids, peptides, and analogues
Goshonoside F2	metab_7198	-	-	-	HMDB0038540	neg	-	-	-	-	Lipids and lipid-like molecules	Prenol lipids	505.281	M+Na-2H	C26H44O8	6.9039	0.0120195	-	74.3	4.68385	90851-25-5	Terpene glycosides
4-Hydroxydebrisoquine	metab_7201	-	-	-	HMDB0006468	neg	-	-	-	-	Organoheterocyclic compounds	Tetrahydroisoquinolines	236.105	M+FA-H	C10H13N3O	6.971	0.00800376	-	56	4.67026	59333-79-8	Not Available
Erinacine A	metab_7281	-	-	-	HMDB0040291	neg	-	-	-	-	Lipids and lipid-like molecules	Prenol lipids	431.244	M-H	C25H36O6	8.4069	0.0220097	-	65.6	-0.659392	-	Diterpenoids
LPE(18:2)	metab_7289	-	-	-	-	neg	-	-	-	-	-	-	476.278	M-H	C23H44NO7P	8.4968	0.00200452	62.7	-	-0.663243	-	-
1-Oleoylglycerophosphoserine	metab_7290	-	-	-	HMDB0061694	neg	-	-	-	-	Lipids and lipid-like molecules	Glycerophospholipids	544.266	M+Na-2H	C24H46NO9P	8.4968	0.00654829	-	37.1	-0.259793	-	Glycerophosphoserines
C12-AS	metab_7304	-	-	-	-	neg	-	-	-	-	-	-	265.148	M-H	C12H26O4S	8.8118	0.00439405	51.6	-	-0.622099	-	-
LysoPC(15:0)	metab_7312	map00564	Glycerophospholipid metabolism	C04230	HMDB0010381	neg	Lipids	Phospholipids	Metabolism	Lipid metabolism	Lipids and lipid-like molecules	Glycerophospholipids	480.309	M-H	C23H48NO7P	8.9018	0.00384521	-	52.4	-0.455715	-	Glycerophosphocholines
LysoPE(0:0/18:3(9Z,12Z,15Z))	metab_7313	-	-	-	HMDB0011479;LMGP02050043	neg	-	-	-	-	Lipids and lipid-like molecules	Glycerophospholipids	520.267	M+FA-H	C23H42NO7P	8.9018	0.00182788	-	31.5	-2.06482	-	Glycerophosphoethanolamines
LPC(16:0)	metab_7314	map00564	Glycerophospholipid metabolism	C04230	LMGP01050018	neg	Lipids	Phospholipids	Metabolism	Lipid metabolism	-	-	540.33	M+FA-H	C24H50NO7P	8.9018	0.0060371	81.2	-	-0.494462	-	-
LPC(18:1)	metab_7315	map00564	Glycerophospholipid metabolism	C04230	-	neg	Lipids	Phospholipids	Metabolism	Lipid metabolism	-	-	566.346	M+FA-H	C26H52NO7P	8.9018	0.00157958	48.3	-	-0.493144	-	-
LPE(16:0)	metab_7327	-	-	-	-	neg	-	-	-	-	-	-	452.278	M-H	C21H44NO7P	9.0144	0.00265875	60.2	-	-0.389175	-	-
Anhydrocinnzeylanol	metab_7337	-	-	-	HMDB0036863	neg	-	-	-	-	Lipids and lipid-like molecules	Prenol lipids	401.172	M+Cl	C20H30O6	9.1046	0.029734	-	51.2	-4.87967	65230-04-8	Terpene lactones
3-Hydroxymethylantipyrine	metab_7348	-	-	-	HMDB0013840	neg	-	-	-	-	Organoheterocyclic compounds	Azoles	239.059	M+Cl	C11H12N2O2	9.217	0.160907	-	61.6	-0.465628	18125-49-0	Pyrazoles
PI	metab_7379	map01100;map00564;map00563;map04136;map00562;map04070	Metabolic pathways; Glycerophospholipid metabolism; Glycosylphosphatidylinositol (GPI)-anchor biosynthesis; Autophagy - other; Inositol phosphate metabolism; Phosphatidylinositol signaling system	C01194	LMGP06010000	neg	Lipids	Phospholipids	Metabolism;Metabolism;Metabolism;Cellular Processes;Metabolism;Environmental Information Processing	Global and overview maps;Lipid metabolism;Glycan biosynthesis and metabolism;Transport and catabolism;Carbohydrate metabolism;Signal transduction	-	-	831.503	M-H2O-H	C43H79O14P	9.5324	0.0192577	71.6	-	-0.256593	-	-
2-hydroxyhexadecanoic acid	metab_7380	-	-	-	HMDB0031057	neg	-	-	-	-	Lipids and lipid-like molecules	Fatty Acyls	271.228	M-H	C16H32O3	9.5775	0.00248545	71.8	-	-0.385192	16452-51-0	Fatty acids and conjugates
Asparagoside B	metab_7392	-	-	-	HMDB0029315	neg	-	-	-	-	Lipids and lipid-like molecules	Steroids and steroid derivatives	577.374	M-H2O-H	C33H56O9	9.6673	0.0327361	-	57.8	-0.721321	60237-69-6	Steroidal glycosides
N-Undecylbenzenesulfonic acid	metab_7411	-	-	-	HMDB0032549	neg	-	-	-	-	Benzenoids	Benzene and substituted derivatives	311.169	M-H	C17H28O3S	9.7794	0.02142	-	55.9	-0.155903	50854-94-9	Benzenesulfonic acids and derivatives
{[3-(6,7-dimethoxy-2H-1,3-benzodioxol-5-yl)prop-2-en-1-yl]oxy}sulfonic acid	metab_7416	-	-	-	HMDB0128688	neg	-	-	-	-	-	-	299.026	M-H2O-H	C12H14O8S	9.8242	0.0373763	-	36.6	9.85999	-	-
Prednisone	metab_7427	-	-	C07370	LMST02030180;HMDB0014773	neg	-	-	-	-	Lipids and lipid-like molecules	Steroids and steroid derivatives	379.156	M+Na-2H	C21H26O5	9.9359	0.0341247	-	62.9	9.13065	1953-03-02	Hydroxysteroids
S-Propyl 1-propanesulfinothioate	metab_7460	-	-	-	HMDB0034394	neg	-	-	-	-	Organic acids and derivatives	Thiosulfinic acid esters	165.04	M-H	C6H14OS2	10.1588	0.0672276	-	36.3	-9.09829	1948-52-3	Not Available
DL-2-hydroxy stearic acid	metab_7461	-	-	-	LMFA02000120	neg	-	-	-	-	-	-	299.259	M-H	C18H36O3	10.1588	0.00597109	72.8	-	-0.682796	-	-
2(R)-hydroxyicosanoic acid	metab_7506	-	-	-	HMDB0061659	neg	-	-	-	-	Lipids and lipid-like molecules	Fatty Acyls	327.29	M-H	C20H40O3	10.6051	0.010937	-	39.9	-0.463918	-	Fatty acids and conjugates
PE(DiMe(11,5)/DiMe(9,3))	metab_7508	-	-	-	HMDB0061483	neg	-	-	-	-	Lipids and lipid-like molecules	Glycerophospholipids	822.529	M-H	C45H78NO10P	10.6051	0.0515463	-	62.5	-0.182597	-	Glycerophosphoethanolamines
PC(18:2(9Z,12Z)/18:3(6Z,9Z,12Z))	metab_7521	-	-	-	HMDB0008140;LMGP01011625	neg	-	-	-	-	Lipids and lipid-like molecules	Glycerophospholipids	824.545	M+FA-H	C44H78NO8P	10.829	0.0245981	-	68.4	0.809762	-	Glycerophosphocholines
PS(18:3(9Z,12Z,15Z)/18:1(9Z))	metab_7530	-	-	-	HMDB0012412;LMGP03010874	neg	-	-	-	-	Lipids and lipid-like molecules	Glycerophospholipids	804.479	M+Na-2H	C42H74NO10P	10.8959	0.0587609	-	47.5	-0.413998	-	Glycerophosphoserines
2(R)-hydroxydocosanoic acid	metab_7537	-	-	-	HMDB0061660	neg	-	-	-	-	Lipids and lipid-like molecules	Fatty Acyls	355.322	M-H	C22H44O3	10.9858	0.0110186	-	42.7	-0.531841	-	Fatty acids and conjugates
PE-NMe(18:1(11Z)/20:3(5Z,8Z,11Z))	metab_7542	-	-	-	HMDB0113123	neg	-	-	-	-	Lipids and lipid-like molecules	Glycerophospholipids	826.56	M+FA-H	C44H80NO8P	11.0982	0.0167783	-	61.1	-0.839535	-	Glycerophosphoethanolamines
PE-NMe(16:0/20:3(5Z,8Z,11Z))	metab_7544	-	-	-	HMDB0113048	neg	-	-	-	-	Lipids and lipid-like molecules	Glycerophospholipids	800.544	M+FA-H	C42H78NO8P	11.1208	0.0124997	-	58.9	-0.276157	-	Glycerophosphoethanolamines
17-phenyl-18,19,20-trinor-prostaglandin E2	metab_7606	-	-	-	HMDB0062612	neg	-	-	-	-	Lipids and lipid-like molecules	Fatty Acyls	407.187	M+Na-2H	C23H30O5	12.1947	0.0126946	-	76.1	8.1642	-	Eicosanoids
NORETHINDRONE ACETATE	metab_7607	-	-	C08152	-	neg	-	-	-	-	-	-	339.2	M-H	C22H28O3	12.2172	0.0158771	35.5	-	8.92016	-	-
PA(18:1(11Z)/18:3(6Z,9Z,12Z))	metab_7650	-	-	-	HMDB0114903	neg	-	-	-	-	Lipids and lipid-like molecules	Glycerophospholipids	695.465	M-H	C39H69O8P	13.2003	0.0158559	-	66.8	-0.695711	-	Glycerophosphates
PA(16:0/18:2(9Z,12Z))	metab_7688	map01100;map00564;map01110;map00561;map04070	Metabolic pathways; Glycerophospholipid metabolism; Biosynthesis of secondary metabolites; Glycerolipid metabolism; Phosphatidylinositol signaling system	C00416	HMDB0007860;LMGP10010023	neg	Lipids	Phospholipids	Metabolism;Metabolism;Metabolism;Metabolism;Environmental Information Processing	Global and overview maps;Lipid metabolism;Global and overview maps;Lipid metabolism;Signal transduction	Lipids and lipid-like molecules	Glycerophospholipids	671.466	M-H	C37H69O8P	14.1842	0.0124651	-	68.5	-0.277155	-	Glycerophosphates
Manglupenone	metab_8076	-	-	-	HMDB0030395	neg	-	-	-	-	Lipids and lipid-like molecules	Prenol lipids	473.282	M+K-2H	C30H44O2	13.715	0.0181073	-	65.9	-1.11977	152369-65-8	Triterpenoids
PA(16:0/18:3(6Z,9Z,12Z))	metab_8090	-	-	-	HMDB0114836;LMGP10010907	neg	-	-	-	-	Lipids and lipid-like molecules	Glycerophospholipids	669.45	M-H	C37H67O8P	13.3572	0.0325436	-	53.7	-0.43985	-	Glycerophosphates
PA(18:2(9Z,12Z)/18:3(6Z,9Z,12Z))	metab_8123	-	-	-	LMGP10010349;HMDB0114955	neg	-	-	-	-	Lipids and lipid-like molecules	Glycerophospholipids	693.45	M-H	C39H67O8P	12.5745	0.021094	-	52.1	-0.621057	-	Glycerophosphates
PA(18:2(9Z,12Z)/18:4(6Z,9Z,12Z,15Z))	metab_8147	-	-	-	LMGP10010351;HMDB0114957	neg	-	-	-	-	Lipids and lipid-like molecules	Glycerophospholipids	691.434	M-H	C39H65O8P	12.0161	0.058523	-	61.7	-0.757574	-	Glycerophosphates
Cerebronic acid	metab_8178	-	-	C17873	HMDB0039540	neg	-	-	-	-	Lipids and lipid-like molecules	Fatty Acyls	383.353	M-H	C24H48O3	11.4349	0.0125251	-	46.4	-0.429019	544-57-0	Fatty acids and conjugates
PS(18:1(9Z)/18:2(9Z,12Z))	metab_8203	-	-	-	LMGP03010958;HMDB0012391	neg	-	-	-	-	Lipids and lipid-like molecules	Glycerophospholipids	806.495	M+Na-2H	C42H76NO10P	11.1433	0.0508382	-	52.6	-0.395208	-	Glycerophosphoserines
Sirolimus	metab_8208	-	-	C07909	HMDB0015015;LMPK06000003	neg	-	-	-	-	Benzenoids	Benzene and substituted derivatives	894.538	M-H2O-H	C51H79NO13	11.0757	0.0360027	-	50.8	0.373643	53123-88-9	Benzoic acids and derivatives
PE(18:2(9Z,12Z)/18:3(9Z,12Z,15Z))	metab_8225	-	-	-	HMDB0009095;LMGP02010665	neg	-	-	-	-	Lipids and lipid-like molecules	Glycerophospholipids	736.492	M-H	C41H72NO8P	10.8959	0.0146271	-	38.4	-0.400157	-	Glycerophosphoethanolamines
Dodecylbenzenesulfonic acid	metab_8229	-	-	-	-	neg	-	-	-	-	-	-	325.184	M-H	C18H30O3S	10.8736	0.020505	72.2	-	-0.635731	-	-
2-Angeloyl-9-(3-methyl-2E-pentenoyl)-2b,9a-dihydroxy-4Z,10(14)-oplopadien-3-one	metab_8279	-	-	-	HMDB0034064	neg	-	-	-	-	Lipids and lipid-like molecules	Prenol lipids	409.236	M-H2O-H	C26H36O5	10.2923	0.0163857	-	48.8	-6.34063	237407-02-2	Sesquiterpenoids
N-Methyl-1H-indole-3-propanamide	metab_8367	-	-	-	HMDB0032756	neg	-	-	-	-	Organoheterocyclic compounds	Indoles and derivatives	239.059	M+K-2H	C12H14N2O	9.7121	0.11966	-	60.2	0.00880018	69397-85-9	Tryptamines and derivatives
5-alpha-Dihydrotestosterone glucuronide	metab_8382	-	-	-	LMST05010041;HMDB0006203	neg	-	-	-	-	Lipids and lipid-like molecules	Steroids and steroid derivatives	501.223	M+Cl	C25H38O8	9.6	0.01441	-	32.9	-5.63704	42037-24-1	Steroidal glycosides
LysoPC(18:0)	metab_8385	map00564	Glycerophospholipid metabolism	C04230	HMDB0010384	neg	Lipids	Phospholipids	Metabolism	Lipid metabolism	Lipids and lipid-like molecules	Glycerophospholipids	568.362	M+FA-H	C26H54NO7P	9.5775	0.0304571	-	62.1	-0.438244	-	Glycerophosphocholines
PE(18:1(9Z)/0:0)	metab_8445	-	-	-	LMGP02050004	neg	-	-	-	-	-	-	478.294	M-H	C23H46NO7P	9.0144	0.00423456	75.1	-	-0.45777	-	-
1-(6Z,9Z,12Z-octadecatrienoyl)-glycero-3-phosphate	metab_8448	-	-	-	LMGP10050023;HMDB0062316	neg	-	-	-	-	Lipids and lipid-like molecules	Glycerophospholipids	431.22	M-H	C21H37O7P	8.9919	0.00374793	-	38.2	-0.656468	-	Glycerophosphates
PG(16:1(9Z)/22:6(4Z,7Z,10Z,13Z,16Z,19Z))	metab_8480	-	-	-	HMDB0010599;LMGP04010898	neg	-	-	-	-	Lipids and lipid-like molecules	Glycerophospholipids	773.484	M-H2O-H	C44H73O10P	8.6317	0.033164	-	31.5	9.84984	-	Glycerophosphoglycerols
DG(13:0/15:0/0:0)	metab_8510	-	-	-	HMDB0093193	neg	-	-	-	-	Lipids and lipid-like molecules	Glycerolipids	557.442	M+FA-H	C31H60O5	8.2943	0.0649192	-	59.5	-0.383625	-	Diradylglycerols
9(S)-HODE	metab_8511	map00591	Linoleic acid metabolism	C14767	-	neg	-	-	Metabolism	Lipid metabolism	-	-	295.228	M-H	C18H32O3	8.2943	0.00675288	50.5	-	-0.824211	-	-
Octanoylglucuronide	metab_8525	map01100;map00040	Metabolic pathways; Pentose and glucuronate interconversions	C03033	HMDB0010347	neg	-	-	Metabolism;Metabolism	Global and overview maps;Carbohydrate metabolism	Organic oxygen compounds	Organooxygen compounds	319.137	M-H	C14H24O8	8.0696	0.00984239	-	78.5	-8.33425	99910-55-1	Carbohydrates and carbohydrate conjugates
Hexadecanedioic acid	metab_8529	map01100;map00073	Metabolic pathways; Cutin, suberine and wax biosynthesis	C19615;C08260	LMFA01170022;HMDB0000672	neg	-	-	Metabolism;Metabolism	Global and overview maps;Lipid metabolism	Lipids and lipid-like molecules	Fatty Acyls	285.207	M-H	C16H30O4	8.0023	0.00587074	64.7	-	-0.410673	505-54-4	Fatty acids and conjugates
LPC(18:3)	metab_8534	map00564	Glycerophospholipid metabolism	C04230	-	neg	Lipids	Phospholipids	Metabolism	Lipid metabolism	-	-	562.315	M+FA-H	C26H48NO7P	7.9123	0.00440401	58.6	-	-0.671931	-	-
(±)13-HpODE	metab_8568	-	-	-	-	neg	-	-	-	-	-	-	311.223	M-H	C18H32O4	7.3966	0.00710059	82.8	-	-0.182487	-	-
Dihydromorelloflavone	metab_8614	-	-	-	HMDB0038392	neg	-	-	-	-	Phenylpropanoids and polyketides	Flavonoids	557.109	M-H	C30H22O11	6.7699	0.0993831	-	80.6	-0.608763	-	Biflavonoids and polyflavonoids
3-(3-methoxyphenyl)-1-(2,3,4,6-tetrahydroxyphenyl)propane-1,2-dione	metab_8629	-	-	-	HMDB0126506	neg	-	-	-	-	-	-	299.056	M-H2O-H	C16H14O7	6.5465	0.0637218	-	40.4	-0.57991	-	-
De-O-methylsimmondsin	metab_8668	-	-	-	HMDB0041208	neg	-	-	-	-	Organic oxygen compounds	Organooxygen compounds	396.109	M+Cl	C15H23NO9	6.0769	0.103239	-	62.4	5.22004	135105-75-8	Carbohydrates and carbohydrate conjugates
FA(18:1(OH3))	metab_8671	-	-	-	-	neg	-	-	-	-	-	-	329.233	M-H	C18H34O5	6.0546	0.00326867	45	-	-0.349256	-	-
5,8-Dihydroxy-3-(4-hydroxybenzyl)-7-methoxy-4-chromanone	metab_8711	-	-	-	HMDB0037251	neg	-	-	-	-	Phenylpropanoids and polyketides	Homoisoflavonoids	315.087	M-H	C17H16O6	5.5193	0.0214869	-	88.6	-0.263543	93078-83-2	Homoisoflavans
7,8-Dihydrovomifoliol 9-[apiosyl-(1->6)-glucoside]	metab_8717	-	-	-	HMDB0029771	neg	-	-	-	-	Lipids and lipid-like molecules	Fatty Acyls	519.244	M-H	C24H40O12	5.4745	0.0101046	-	43.9	-0.710775	177261-70-0	Fatty acyl glycosides
1-(4-methoxyphenyl)pentan-3-ol	metab_8721	-	-	-	HMDB0132986	neg	-	-	-	-	-	-	239.128	M+FA-H	C12H18O2	5.4081	0.0130576	-	46.3	-2.15411	-	-
3-phenyl-3,4-dihydro-2H-1-benzopyran-4,6,7,8-tetrol	metab_8735	-	-	-	HMDB0134001	neg	-	-	-	-	-	-	273.077	M-H	C15H14O5	5.2308	0.0868781	-	38.5	-0.948594	-	-
PHLORACETOPHENONE	metab_8736	-	-	-	-	neg	-	-	-	-	-	-	167.034	M-H	C8H8O4	5.2308	0.132256	43.9	-	-6.38564	-	-
Cinncassiol D4 2-glucoside	metab_8741	-	-	-	HMDB0035065	neg	-	-	-	-	Lipids and lipid-like molecules	Prenol lipids	495.26	M-H2O-H	C26H42O10	5.1872	0.0139749	-	55.3	-0.581339	-	Terpene glycosides
5'-(3'-Methoxy-4'-hydroxyphenyl)-gamma-valerolactone	metab_8744	-	-	-	HMDB0029226	neg	-	-	-	-	Benzenoids	Phenols	203.071	M-H2O-H	C12H14O4	5.1872	0.0286641	-	57.6	-3.35458	-	Methoxyphenols
2-Hydroxycarbamazepine	metab_8750	-	-	C16601	HMDB0060651	neg	-	-	-	-	Alkaloids and derivatives	Morphinans	273.067	M+Na-2H	C15H12N2O2	5.1429	0.00778869	-	45.1	8.36436	-	Not Available
3-(4-hydroxyphenyl)-N-(4-oxobutyl)prop-2-enimidic acid	metab_8751	-	-	-	HMDB0139876	neg	-	-	-	-	-	-	270.053	M+K-2H	C13H15NO3	5.1429	0.0155947	-	39.3	-3.52974	-	-
ESCULETIN	metab_8752	-	-	C09263	-	neg	-	-	-	-	-	-	177.018	M-H	C9H6O4	5.1429	0.0166095	44.4	-	-5.52781	-	-
2-Benzofurancarboxaldehyde	metab_8753	-	-	-	HMDB0033183	neg	-	-	-	-	Organoheterocyclic compounds	Benzofurans	145.028	M-H	C9H6O2	5.1429	0.0413471	-	46.2	-8.44442	4265-16-1	Not Available
Hesperetin	metab_8759	map00941	Flavonoid biosynthesis	C01709	LMPK12140003;HMDB0005782	neg	-	-	Metabolism	Biosynthesis of other secondary metabolites	Phenylpropanoids and polyketides	Flavonoids	301.071	M-H	C16H14O6	5.099	0.0171046	31.2	-	-0.982649	520-33-2	O-methylated flavonoids
6-Pentyl-1,4-dioxan-2-one	metab_8805	-	-	-	HMDB0059937	neg	-	-	-	-	Organoheterocyclic compounds	Dioxanes	153.091	M-H2O-H	C9H16O3	4.6543	0.00880632	-	45.7	-6.53601	93263-92-4	1,4-dioxanes
28-[Glucosyl-(1->6)-glucosyl]oleanolic acid 3-arabinoside	metab_8832	-	-	-	HMDB0036362	neg	-	-	-	-	Lipids and lipid-like molecules	Prenol lipids	949.464	M+K-2H	C47H76O17	4.4538	0.00939947	-	56.7	8.25409	120481-38-1	Terpene glycosides
Capsicoside D	metab_8833	-	-	-	HMDB0040871	neg	-	-	-	-	Lipids and lipid-like molecules	Steroids and steroid derivatives	687.315	M-2H	C62H104O33	4.4538	0.0151846	-	53.4	-0.644749	160260-25-3	Steroidal glycosides
Azelaic acid	metab_8851	-	-	C08261	LMFA01170054;HMDB0000784	neg	-	-	-	-	Lipids and lipid-like molecules	Fatty Acyls	187.097	M-H	C9H16O4	4.4087	0.00571512	34.8	-	-4.75085	123-99-9	Fatty acids and conjugates
Tomatine	metab_8858	-	-	C10827	LMST01150015;HMDB0034103	neg	-	-	-	-	Lipids and lipid-like molecules	Steroids and steroid derivatives	1032.54	M-H	C50H83NO21	4.3639	0.00656592	-	75.6	-0.694859	17406-45-0	Steroidal glycosides
Brassica napus non-fluorescent chlorophyll catabolite 3	metab_8861	-	-	-	HMDB0040917	neg	-	-	-	-	Organoheterocyclic compounds	Tetrapyrroles and derivatives	675.267	M+FA-H	C34H38N4O8	4.3413	0.0105252	-	70	-1.00778	173740-48-2	Not Available
4,5-Dihydroxy-2-(hydroxymethyl)-10-oxo-9,10-dihydro-9-anthracenyl hexopyranoside	metab_8862	-	-	-	-	neg	-	-	-	-	-	-	433.114	M-H	C21H22O10	4.3413	0.00915589	50	-	-0.725719	-	-
N-cis-Feruloyltyramine	metab_8871	-	-	-	HMDB0036381	neg	-	-	-	-	Phenylpropanoids and polyketides	Cinnamic acids and derivatives	312.124	M-H	C18H19NO4	4.3189	0.0042798	-	63.7	-0.344628	80510-09-4	Hydroxycinnamic acids and derivatives
N-(p-Hydroxyphenyl)ethyl p-hydroxycinnamide	metab_8872	-	-	-	HMDB0039521	neg	-	-	-	-	Phenylpropanoids and polyketides	Cinnamic acids and derivatives	282.113	M-H	C17H17NO3	4.3189	0.0262443	-	60	-0.623073	36417-86-4	Hydroxycinnamic acids and derivatives
Spinacetin 3-(2''-feruloylgentiobioside)	metab_8875	-	-	-	HMDB0031424	neg	-	-	-	-	Phenylpropanoids and polyketides	Flavonoids	845.214	M-H	C39H42O21	4.2966	0.0314265	-	66.5	-0.512204	-	Flavonoid glycosides
Vanillin	metab_8880	map01100;map01110;map00998	Metabolic pathways; Biosynthesis of secondary metabolites; Biosynthesis of various secondary metabolites - part 2	C00755	HMDB0012308	neg	-	-	Metabolism;Metabolism;Metabolism	Global and overview maps;Global and overview maps;Biosynthesis of other secondary metabolites	Benzenoids	Phenols	151.039	M-H	C8H8O3	4.2966	0.0226377	63.1	-	-7.53813	121-33-5	Methoxyphenols
Dehydrotomatine	metab_8894	-	-	-	HMDB0032002	neg	-	-	-	-	Lipids and lipid-like molecules	Steroids and steroid derivatives	1030.52	M-H	C50H81NO21	4.2294	0.00794159	-	74.1	-0.231966	157604-98-3	Steroidal glycosides
Trilostane	metab_8907	-	-	C12580	HMDB0015240	neg	-	-	-	-	Lipids and lipid-like molecules	Steroids and steroid derivatives	374.2	M+FA-H	C20H27NO3	4.1182	0.0155214	-	56.6	9.43638	13647-35-3	Estrane steroids
Ranupenin 3-rutinoside	metab_8950	-	-	-	LMPK12113184;HMDB0037358	neg	-	-	-	-	Phenylpropanoids and polyketides	Flavonoids	661.139	M+Na-2H	C28H32O17	3.8508	0.0365617	-	69.4	1.11589	85122-22-1	Flavonoid glycosides
Kaempferol-3-O-rutinoside	metab_8954	map01110;map00944	Biosynthesis of secondary metabolites; Flavone and flavonol biosynthesis	C21833	-	neg	-	-	Metabolism;Metabolism	Global and overview maps;Biosynthesis of other secondary metabolites	-	-	593.151	M-H	C27H30O15	3.8508	0.0012133	85.5	-	-0.584139	-	-
Mangicrocin	metab_8958	-	-	-	HMDB0034055	neg	-	-	-	-	Lipids and lipid-like molecules	Prenol lipids	931.251	M+K-2H	C45H50O19	3.8286	0.0300427	-	52.6	8.59514	122575-51-3	Diterpenoids
Calendoflavoside	metab_8959	-	-	-	HMDB0037745	neg	-	-	-	-	Phenylpropanoids and polyketides	Flavonoids	623.162	M-H	C28H32O16	3.8286	0.0089106	-	31	-0.349422	55033-90-4	Flavonoid glycosides
6''-Acetylliquiritin	metab_8967	-	-	-	HMDB0041385	neg	-	-	-	-	Phenylpropanoids and polyketides	Flavonoids	505.135	M+FA-H	C23H24O10	3.7841	0.0716432	-	48.4	-0.214596	166531-17-5	Flavonoid glycosides
Nomilinic acid 17-glucoside	metab_8984	-	-	-	HMDB0037892	neg	-	-	-	-	Lipids and lipid-like molecules	Saccharolipids	693.277	M-H2O-H	C34H48O16	3.6951	0.0118265	-	51.4	1.45699	113301-65-8	Not Available
Spinacetin 3-[p-coumaroyl-(->2)-glucosyl-(1->6)-[apiosyl-(1->2)]-glucoside]	metab_8994	-	-	-	HMDB0031426	neg	-	-	-	-	Phenylpropanoids and polyketides	Flavonoids	947.246	M-H	C43H48O24	3.6505	0.00352268	-	70.1	-0.351538	-	Flavonoid glycosides
3,4-dihydroxy-6H-benzo[c]chromen-6-one	metab_8998	-	-	-	HMDB0142421	neg	-	-	-	-	-	-	273.04	M+FA-H	C13H8O4	3.6505	0.0478029	-	65.6	-0.201267	-	-
Pisumionoside	metab_9012	-	-	-	HMDB0039947	neg	-	-	-	-	Lipids and lipid-like molecules	Prenol lipids	449.203	M+FA-H	C19H32O9	3.5838	0.0094569	-	41.5	-0.360795	371113-06-3	Terpene glycosides
N-Acetyl-D-phenylalanine	metab_9036	map01100;map00360	Metabolic pathways; Phenylalanine metabolism	C05620	-	neg	-	-	Metabolism;Metabolism	Global and overview maps;Amino acid metabolism	-	-	206.082	M-H	C11H13NO3	3.4723	0.0718977	89.4	-	-3.36686	-	-
D-(+)-Malic acid	metab_9121	map01100;map00650	Metabolic pathways; Butanoate metabolism	C00497	-	neg	-	-	Metabolism;Metabolism	Global and overview maps;Carbohydrate metabolism	-	-	133.013	M-H	C4H6O5	3.0946	0.00428649	46.3	-	-9.36057	-	-
3-O-Feruloylquinic acid	metab_9123	-	-	C02572	HMDB0030669	neg	-	-	-	-	Organic oxygen compounds	Organooxygen compounds	367.103	M-H	C17H20O9	3.0724	0.0183594	36.9	-	-0.748376	62929-69-5	Alcohols and polyols
Pisumoside B	metab_9170	-	-	-	HMDB0037125	neg	-	-	-	-	Lipids and lipid-like molecules	Prenol lipids	673.305	M-H2O-H	C32H52O16	2.8506	0.00414993	-	33.3	-4.04833	333334-43-3	Terpene glycosides
(1S,2S,4R,8S)-p-Menthane-1,2,8,9-tetrol 2-glucoside	metab_9181	-	-	-	HMDB0039975	neg	-	-	-	-	Lipids and lipid-like molecules	Prenol lipids	411.187	M+FA-H	C16H30O9	2.806	0.00658657	-	38.2	-0.478093	402593-52-6	Terpene glycosides
N-Decanoylglycine	metab_9190	-	-	-	HMDB0013267	neg	-	-	-	-	Organic acids and derivatives	Carboxylic acids and derivatives	274.166	M+FA-H	C12H23NO3	2.7839	0.00861682	-	30.9	-0.409445	-	Amino acids, peptides, and analogues
Vanillin acetate	metab_9200	-	-	-	HMDB0029663	neg	-	-	-	-	Benzenoids	Phenol esters	175.039	M-H2O-H	C10H10O4	2.7618	0.0116184	-	38.2	-5.06017	881-68-5	Not Available
Jasmolone glucoside	metab_9207	-	-	-	HMDB0032870	neg	-	-	-	-	Organic oxygen compounds	Organooxygen compounds	387.166	M+FA-H	C17H26O7	2.7397	0.00444829	-	56.2	-0.413286	-	Carbohydrates and carbohydrate conjugates
3,4-Dihydroxybenzaldehyde	metab_9210	map00950	Isoquinoline alkaloid biosynthesis	C16700	HMDB0059965	neg	-	-	Metabolism	Biosynthesis of other secondary metabolites	Organic oxygen compounds	Organooxygen compounds	137.023	M-H	C7H6O3	2.7397	0.00652756	51.1	-	-8.83563	139-85-5	Carbonyl compounds
Eugenitol	metab_9214	-	-	-	HMDB0029466	neg	-	-	-	-	Organoheterocyclic compounds	Benzopyrans	205.05	M-H	C11H10O4	2.7175	0.0286312	-	40.2	-3.69356	491-48-5	1-benzopyrans
3-Hydroxy-4,6-heptadiyne-1-yl 1-glucoside	metab_9222	-	-	-	HMDB0038964	neg	-	-	-	-	Lipids and lipid-like molecules	Fatty Acyls	307.082	M+Na-2H	C13H18O7	2.6953	0.0293175	-	54.3	7.57745	-	Fatty acyl glycosides
Chlorogenoquinone	metab_9234	-	-	-	HMDB0029383	neg	-	-	-	-	Organic oxygen compounds	Organooxygen compounds	351.072	M-H	C16H16O9	2.6507	0.00455056	-	50.4	-0.529208	24321-18-4	Alcohols and polyols
3-Methylpentyl glucosinolate	metab_9242	-	-	-	HMDB0036355	neg	-	-	-	-	Organic oxygen compounds	Organooxygen compounds	438.065	M+Cl	C13H25NO9S2	2.6286	0.0123073	-	36.5	-3.54562	-	Carbohydrates and carbohydrate conjugates
3-HYDROXYCOUMARIN	metab_9251	-	-	-	-	neg	-	-	-	-	-	-	161.023	M-H	C9H6O3	2.6286	0.00506461	78	-	-6.86285	-	-
1-Ipomeanol	metab_9254	-	-	-	HMDB0030473	neg	-	-	-	-	Organoheterocyclic compounds	Heteroaromatic compounds	189.055	M+Na-2H	C9H12O3	2.6069	0.0352779	-	40.5	9.80619	34435-70-6	Not Available
Gardenoside	metab_9257	-	-	C09779	-	neg	-	-	-	-	-	-	385.114	M-H2O-H	C17H24O11	2.5851	0.0325032	41.4	-	-0.0958209	-	-
Geniposidic Acid	metab_9258	map01110;map00902	Biosynthesis of secondary metabolites; Monoterpenoid biosynthesis	C11673	HMDB0034942	neg	-	-	Metabolism;Metabolism	Global and overview maps;Metabolism of terpenoids and polyketides	Lipids and lipid-like molecules	Prenol lipids	355.103	M-H2O-H	C16H22O10	2.5851	0.00516941	61.7	-	-0.444217	27741-01-1	Terpene glycosides
Sinapic acid	metab_9259	map01100;map00940;map01110	Metabolic pathways; Phenylpropanoid biosynthesis; Biosynthesis of secondary metabolites	C00482	HMDB0032616	neg	-	-	Metabolism;Metabolism;Metabolism	Global and overview maps;Biosynthesis of other secondary metabolites;Global and overview maps	Phenylpropanoids and polyketides	Cinnamic acids and derivatives	223.061	M-H	C11H12O5	2.5851	0.0168664	56.8	-	-2.63251	530-59-6	Hydroxycinnamic acids and derivatives
2-O-Benzoyl-D-glucose	metab_9268	-	-	-	HMDB0034618	neg	-	-	-	-	Organic oxygen compounds	Organooxygen compounds	329.088	M+FA-H	C13H16O7	2.5406	0.0125096	-	46.4	-0.253959	63029-01-6	Carbohydrates and carbohydrate conjugates
Uralenneoside	metab_9295	-	-	-	HMDB0041272	neg	-	-	-	-	Benzenoids	Benzene and substituted derivatives	285.061	M-H	C12H14O8	2.4741	0.00298803	-	54.8	-0.503435	143986-30-5	Benzoic acids and derivatives
Ferulic acid	metab_9297	map01100;map00940;map01110	Metabolic pathways; Phenylpropanoid biosynthesis; Biosynthesis of secondary metabolites	C01494	-	neg	-	-	Metabolism;Metabolism;Metabolism	Global and overview maps;Biosynthesis of other secondary metabolites;Global and overview maps	-	-	193.05	M-H	C10H10O4	2.4741	0.00337689	77.9	-	-4.06993	-	-
Prolylhydroxyproline	metab_9329	-	-	-	HMDB0006695	neg	-	-	-	-	Organic acids and derivatives	Carboxylic acids and derivatives	227.103	M-H	C10H16N2O4	2.4305	0.0168013	-	53.9	-2.306	18684-24-7	Amino acids, peptides, and analogues
ACEXAMIC ACID	metab_9331	-	-	-	-	neg	-	-	-	-	-	-	172.097	M-H	C8H15NO3	2.4305	0.0110757	57	-	-5.82442	-	-
3-Methyladipic acid	metab_9332	-	-	-	HMDB0000555	neg	-	-	-	-	Lipids and lipid-like molecules	Fatty Acyls	159.065	M-H	C7H12O4	2.4305	0.00484119	54.4	-	-6.91862	3058-01-03	Fatty acids and conjugates
1,2,10-Trihydroxydihydro-trans-linalyl oxide 7-O-beta-D-glucopyranoside	metab_9336	-	-	-	HMDB0033237	neg	-	-	-	-	Organic oxygen compounds	Organooxygen compounds	381.177	M-H	C16H30O10	2.4082	0.0193236	-	56.4	-0.233301	219814-37-6	Carbohydrates and carbohydrate conjugates
L-Tryptophan	metab_9340	map01100;map01110;map00260;map01210;map00998;map01230;map00966;map00970;map00400;map00380	Metabolic pathways; Biosynthesis of secondary metabolites; Glycine, serine and threonine metabolism; 2-Oxocarboxylic acid metabolism; Biosynthesis of various secondary metabolites - part 2; Biosynthesis of amino acids; Glucosinolate biosynthesis; Aminoacyl-tRNA biosynthesis; Phenylalanine, tyrosine and tryptophan biosynthesis; Tryptophan metabolism	C00078	HMDB0000929	neg	Peptides	Amino acids	Metabolism;Metabolism;Metabolism;Metabolism;Metabolism;Metabolism;Metabolism;Genetic Information Processing;Metabolism;Metabolism	Global and overview maps;Global and overview maps;Amino acid metabolism;Global and overview maps;Biosynthesis of other secondary metabolites;Global and overview maps;Biosynthesis of other secondary metabolites;Translation;Amino acid metabolism;Amino acid metabolism	Organoheterocyclic compounds	Indoles and derivatives	203.082	M-H	C11H12N2O2	2.4082	0.0137152	85.7	-	-3.7578	73-22-3	Indolyl carboxylic acids and derivatives
Amylose	metab_9355	map01100;map00500;map01110	Metabolic pathways; Starch and sucrose metabolism; Biosynthesis of secondary metabolites	C00718	HMDB0003403	neg	-	-	Metabolism;Metabolism;Metabolism	Global and overview maps;Carbohydrate metabolism;Global and overview maps	Organic oxygen compounds	Organooxygen compounds	351.129	M-H2O-H	C2H6.[C12H20O11]n	2.364	0.00312291	-	43	-0.497366	9005-82-7	Carbohydrates and carbohydrate conjugates
Na-Hexanoyl-Nb-inosityltryptophan	metab_9369	-	-	-	HMDB0039501	neg	-	-	-	-	Organic acids and derivatives	Carboxylic acids and derivatives	445.194	M-H2O-H	C23H32N2O8	2.3199	0.0178391	-	37.2	-9.05022	124772-47-0	Amino acids, peptides, and analogues
Caffeic acid hexoside	metab_9371	-	-	-	-	neg	-	-	-	-	-	-	341.088	M-H	C15H18O9	2.3199	0.00320639	59	-	1.22272	-	-
4-(Butoxymethyl)phenol	metab_9375	-	-	-	HMDB0039957	neg	-	-	-	-	Benzenoids	Benzene and substituted derivatives	179.107	M-H	C11H16O2	2.3199	0.00819533	-	42.6	-4.96143	57726-27-9	Benzylethers
D-1-[(3-Carboxypropyl)amino]-1-deoxyfructose	metab_9452	-	-	-	HMDB0038663	neg	-	-	-	-	Organic acids and derivatives	Carboxylic acids and derivatives	310.116	M+FA-H	C10H19NO7	2.1195	0.0381472	-	37.2	4.58147	10003-63-1	Amino acids, peptides, and analogues
Gamma-Glutamyltryptophan	metab_9472	-	-	-	HMDB0029160	neg	-	-	-	-	Organic acids and derivatives	Carboxylic acids and derivatives	378.134	M+FA-H	C16H19N3O5	2.0748	0.0791375	-	67.9	9.35326	66471-20-3	Amino acids, peptides, and analogues
Monotropein	metab_9484	-	-	C09788	HMDB0035608;LMPR0102070012	neg	-	-	-	-	Lipids and lipid-like molecules	Prenol lipids	371.098	M-H2O-H	C16H22O11	2.0525	0.00406794	-	42.2	-0.462866	5945-50-6	Terpene glycosides
P-Salicylic acid	metab_9495	map01100;map00130;map01110;map00790	Metabolic pathways; Ubiquinone and other terpenoid-quinone biosynthesis; Biosynthesis of secondary metabolites; Folate biosynthesis	C00156	-	neg	-	-	Metabolism;Metabolism;Metabolism;Metabolism	Global and overview maps;Metabolism of cofactors and vitamins;Global and overview maps;Metabolism of cofactors and vitamins	-	-	137.023	M-H	C7H6O3	2.0525	0.00704724	77.9	-	-8.92098	-	-
2-Hydroxycaproic acid	metab_9501	-	-	-	HMDB0001624	neg	-	-	-	-	Lipids and lipid-like molecules	Fatty Acyls	113.06	M-H2O-H	C6H12O3	2.0306	0.0139329	-	30.7	-9.82999	6064-63-7	Fatty acids and conjugates
N-Acetylproline	metab_9526	-	-	-	HMDB0094701	neg	-	-	-	-	Organic acids and derivatives	Carboxylic acids and derivatives	138.055	M-H2O-H	C7H11NO3	1.8973	0.00743399	-	37	-7.78887	68-95-1	Amino acids, peptides, and analogues
L-Serine	metab_9562	map01100;map00630;map01110;map00920;map01502;map00460;map00270;map01200;map01230;map00600;map02010;map00260;map00261;map00970	Metabolic pathways; Glyoxylate and dicarboxylate metabolism; Biosynthesis of secondary metabolites; Sulfur metabolism; Vancomycin resistance; Cyanoamino acid metabolism; Cysteine and methionine metabolism; Carbon metabolism; Biosynthesis of amino acids; Sphingolipid metabolism; ABC transporters; Glycine, serine and threonine metabolism; Monobactam biosynthesis; Aminoacyl-tRNA biosynthesis	C00065	HMDB0000187	neg	Peptides	Amino acids	Metabolism;Metabolism;Metabolism;Metabolism;Human Diseases;Metabolism;Metabolism;Metabolism;Metabolism;Metabolism;Environmental Information Processing;Metabolism;Metabolism;Genetic Information Processing	Global and overview maps;Carbohydrate metabolism;Global and overview maps;Energy metabolism;Drug resistance: antimicrobial;Metabolism of other amino acids;Amino acid metabolism;Global and overview maps;Global and overview maps;Lipid metabolism;Membrane transport;Amino acid metabolism;Biosynthesis of other secondary metabolites;Translation	Organic acids and derivatives	Carboxylic acids and derivatives	150.041	M+FA-H	C3H7NO3	1.7201	0.0110552	34.3	-	1.41946	56-45-1	Amino acids, peptides, and analogues
(Z)-5-[(5-Methyl-2-thienyl)methylene]-2(5H)-furanone	metab_9573	-	-	-	HMDB0033845	neg	-	-	-	-	Organoheterocyclic compounds	Thiophenes	213.001	M+Na-2H	C10H8O2S	1.6759	0.0034958	-	31.6	9.51986	5705-62-4	2,5-disubstituted thiophenes
Glucosamine	metab_9582	map01100;map00520	Metabolic pathways; Amino sugar and nucleotide sugar metabolism	C00329	HMDB0001514	neg	Carbohydrates	Monosaccharides	Metabolism;Metabolism	Global and overview maps;Carbohydrate metabolism	Organic oxygen compounds	Organooxygen compounds	160.06	M-H2O-H	C6H13NO5	1.6537	0.0273286	-	33	-6.31779	3416-24-8	Carbohydrates and carbohydrate conjugates
Indole-3-acetic-acid-O-glucuronide	metab_9591	-	-	-	HMDB0060001	neg	-	-	-	-	Lipids and lipid-like molecules	Prenol lipids	372.07	M+Na-2H	C16H17NO8	1.5906	0.0127075	-	38.6	-0.980159	-	Terpene glycosides
Guanidylic acid (guanosine monophosphate)	metab_9593	-	-	-	-	neg	-	-	-	-	-	-	362.051	M-H	C10H14N5O8P	1.5906	0.0221814	67.3	-	-0.480116	-	-
Ribonolactone	metab_9595	-	-	C02674	HMDB0001900	neg	-	-	-	-	Organic oxygen compounds	Organooxygen compounds	147.029	M-H	C5H8O5	1.5906	0.0110826	-	31.5	-8.15197	5336-08-03	Carbohydrates and carbohydrate conjugates
Trichloroethanol glucuronide	metab_9615	-	-	C14869	HMDB0042049	neg	-	-	-	-	Organic oxygen compounds	Organooxygen compounds	368.958	M+FA-H	C8H11Cl3O7	1.5028	0.0192497	-	30.7	7.13842	97-25-6	Carbohydrates and carbohydrate conjugates
UDP-D-galactose	metab_9630	map01100;map00520;map00052	Metabolic pathways; Amino sugar and nucleotide sugar metabolism; Galactose metabolism	C00052;C02199	-	neg	-	-	Metabolism;Metabolism;Metabolism	Global and overview maps;Carbohydrate metabolism;Carbohydrate metabolism	-	-	565.047	M-H	C15H24N2O17P2	1.4392	0.00298037	94.4	-	-0.830351	-	-
Uridine diphosphate (UDP)	metab_9632	-	-	-	-	neg	-	-	-	-	-	-	402.994	M-H	C9H14N2O12P2	1.4392	0.0295018	75.2	-	-1.35396	-	-
D-myo-Inositol 1,4-bisphosphate	metab_9639	map01100;map04070;map00562	Metabolic pathways; Phosphatidylinositol signaling system; Inositol phosphate metabolism	C01220	-	neg	-	-	Metabolism;Environmental Information Processing;Metabolism	Global and overview maps;Signal transduction;Carbohydrate metabolism	-	-	338.989	M-H	C6H14O12P2	1.4177	0.00797368	78.9	-	-0.727797	-	-
ADP	metab_9659	map01100;map01110;map00230;map00908;map00195;map00190	Metabolic pathways; Biosynthesis of secondary metabolites; Purine metabolism; Zeatin biosynthesis; Photosynthesis; Oxidative phosphorylation	C00008	HMDB0001341	neg	Nucleic acids	Nucleotides	Metabolism;Metabolism;Metabolism;Metabolism;Metabolism;Metabolism	Global and overview maps;Global and overview maps;Nucleotide metabolism;Metabolism of terpenoids and polyketides;Energy metabolism;Energy metabolism	Nucleosides, nucleotides, and analogues	Purine nucleotides	426.022	M-H	C10H15N5O10P2	1.3344	0.00976744	48.4	-	-0.194557	58-64-0	Purine ribonucleotides
4-Hydroxy-2-oxoglutaric acid	metab_9666	map01100;map00630	Metabolic pathways; Glyoxylate and dicarboxylate metabolism	C01127	HMDB0002070	neg	-	-	Metabolism;Metabolism	Global and overview maps;Carbohydrate metabolism	Organic acids and derivatives	Keto acids and derivatives	142.997	M-H2O-H	C5H6O6	1.3344	0.0145723	-	43.5	-7.54992	1187-99-1	Gamma-keto acids and derivatives
Adenosine monophosphate	metab_9673	map01100;map01110;map00230;map00908	Metabolic pathways; Biosynthesis of secondary metabolites; Purine metabolism; Zeatin biosynthesis	C00020;C00946;C01367	HMDB0000045	neg	Nucleic acids;-;-	Nucleotides;-;-	Metabolism;Metabolism;Metabolism;Metabolism	Global and overview maps;Global and overview maps;Nucleotide metabolism;Metabolism of terpenoids and polyketides	Nucleosides, nucleotides, and analogues	Purine nucleotides	346.056	M-H	C10H14N5O7P	1.3161	0.00977491	71	-	-0.844352	61-19-8	Purine ribonucleotides
Ethyl beta-D-glucopyranoside	metab_9698	-	-	-	HMDB0029968	neg	-	-	-	-	Organic oxygen compounds	Organooxygen compounds	245.043	M+K-2H	C8H16O6	1.2977	0.0180899	-	77.2	-2.71528	3198-49-0	Carbohydrates and carbohydrate conjugates
1-Deoxy-D-xylulose	metab_9703	-	-	C06257	HMDB0001292	neg	-	-	-	-	Organic oxygen compounds	Organooxygen compounds	171.005	M+K-2H	C5H10O4	1.2977	0.00412142	-	39.1	-8.69094	-	Carbohydrates and carbohydrate conjugates
Liquiritigenin 4'-[3-acetylapiosyl-(1->2)-glucoside]	metab_9710	-	-	-	LMPK12140026;HMDB0035444	neg	-	-	-	-	Phenylpropanoids and polyketides	Flavonoids	591.178	M-H	C28H32O14	1.2783	0.0040546	-	47	9.45007	226946-10-7	Flavonoid glycosides
1-(sn-Glycero-3-phospho)-1D-myo-inositol	metab_9715	-	-	C01225	HMDB0011649	neg	-	-	-	-	Lipids and lipid-like molecules	Glycerophospholipids	333.059	M-H	C9H19O11P	1.2783	0.00837005	-	36.5	-0.561933	-	Glycerophosphoinositols
Alpha-D-Galacturonic acid	metab_9719	-	-	-	-	neg	-	-	-	-	-	-	193.035	M-H	C6H10O7	1.2783	0.0112953	65.5	-	-4.50885	-	-
L-Aspartic Acid	metab_9722	map01100;map00220;map01110;map00770;map00300;map00760;map01210;map00270;map01200;map00260;map01230;map00460;map00250;map00710;map00970;map00261;map02010;map00410;map00340	Metabolic pathways; Arginine biosynthesis; Biosynthesis of secondary metabolites; Pantothenate and CoA biosynthesis; Lysine biosynthesis; Nicotinate and nicotinamide metabolism; 2-Oxocarboxylic acid metabolism; Cysteine and methionine metabolism; Carbon metabolism; Glycine, serine and threonine metabolism; Biosynthesis of amino acids; Cyanoamino acid metabolism; Alanine, aspartate and glutamate m…	C00049	HMDB0000191	neg	Peptides;Hormones and transmitters	Amino acids;Neurotransmitters	Metabolism;Metabolism;Metabolism;Metabolism;Metabolism;Metabolism;Metabolism;Metabolism;Metabolism;Metabolism;Metabolism;Metabolism;Metabolism;Metabolism;Genetic Information Processing;Metabolism;Environmental Information Processing;Metabolism;Metabolism	Global and overview maps;Amino acid metabolism;Global and overview maps;Metabolism of cofactors and vitamins;Amino acid metabolism;Metabolism of cofactors and vitamins;Global and overview maps;Amino acid metabolism;Global and overview maps;Amino acid metabolism;Global and overview maps;Metabolism of other amino acids;Amino acid metabolism;Energy metabolism;Translation;Biosynthesis of other second…	Organic acids and derivatives	Carboxylic acids and derivatives	132.029	M-H	C4H7NO4	1.2783	0.00822901	86.1	-	-9.57196	56-84-8	Amino acids, peptides, and analogues
Cytidine	metab_9727	map00240;map01100;map02010	Pyrimidine metabolism; Metabolic pathways; ABC transporters	C00475;C02961	HMDB0000089	neg	Nucleic acids;-	Nucleosides;-	Metabolism;Metabolism;Environmental Information Processing	Nucleotide metabolism;Global and overview maps;Membrane transport	Nucleosides, nucleotides, and analogues	Pyrimidine nucleosides	242.079	M-H	C9H13N3O5	1.2581	0.0144789	-	31.4	4.96873	65-46-3	Not Available
Phospho-L-serine	metab_9759	-	-	-	-	neg	-	-	-	-	-	-	184.001	M-H	C3H8NO6P	1.2365	0.0671709	40.3	-	-4.54746	-	-
Urocanic acid	metab_9760	map01100;map00340	Metabolic pathways; Histidine metabolism	C00785	HMDB0000301	neg	-	-	Metabolism;Metabolism	Global and overview maps;Amino acid metabolism	Organoheterocyclic compounds	Azoles	137.034	M-H	C6H6N2O2	1.2365	0.0249194	60.5	-	-9.34165	104-98-3	Imidazoles
L-Arginine	metab_9784	map01100;map00220;map01110;map02010;map00330;map01230;map00970;map00261	Metabolic pathways; Arginine biosynthesis; Biosynthesis of secondary metabolites; ABC transporters; Arginine and proline metabolism; Biosynthesis of amino acids; Aminoacyl-tRNA biosynthesis; Monobactam biosynthesis	C00062	HMDB0000517	neg	Peptides	Amino acids	Metabolism;Metabolism;Metabolism;Environmental Information Processing;Metabolism;Metabolism;Genetic Information Processing;Metabolism	Global and overview maps;Amino acid metabolism;Global and overview maps;Membrane transport;Amino acid metabolism;Global and overview maps;Translation;Biosynthesis of other secondary metabolites	Organic acids and derivatives	Carboxylic acids and derivatives	173.103	M-H	C6H14N4O2	1.2165	0.0753927	81.6	-	-5.60075	74-79-3	Amino acids, peptides, and analogues
