# Supplementary material for: Effect of SlSAHH2 on metabolites in over-expressed and wild-type tomato fruit
Source: PeerJ. 2024 May 29;12:e17466. doi: 10.7717/peerj.17466 (PMC11143970; doi:10.7717/peerj.17466)
Supplement: Supplemental Information 2 [file peerj-12-17466-s002.xlsx]

## Sheet: HMDB化合物分类
Detailed information of 547 metabolites compared from the HMDB database for three varieties
Metabolite	Superclass	Number
Lipids and lipid-like molecules	225
2-Hydroxy-p-mentha-1,8-dien-6-one	Lipids and lipid-like molecules	225
Suberic acid	Lipids and lipid-like molecules
Propyl 2,4-decadienoate	Lipids and lipid-like molecules
Lucidenic acid A	Lipids and lipid-like molecules
PA(20:1(11Z)/22:6(4Z,7Z,10Z,13Z,16Z,19Z))	Lipids and lipid-like molecules
4-Hydroxyproline galactoside	Lipids and lipid-like molecules
3-Methyl-5-pentyl-2-furanpropanoic acid	Lipids and lipid-like molecules
Abscisic acid	Lipids and lipid-like molecules
CDP-DG(16:1(9Z)/22:5(7Z,10Z,13Z,16Z,19Z))	Lipids and lipid-like molecules
Linoleic acid	Lipids and lipid-like molecules
PC(18:2(9Z,12Z)/18:3(9Z,12Z,15Z))	Lipids and lipid-like molecules
PE(16:1(9Z)/20:4(5Z,8Z,11Z,14Z))	Lipids and lipid-like molecules
PE(16:0/18:3(9Z,12Z,15Z))	Lipids and lipid-like molecules
DG(16:0/18:3(9Z,12Z,15Z)/0:0)	Lipids and lipid-like molecules
PA(18:4(6Z,9Z,12Z,15Z)/20:4(5Z,8Z,11Z,14Z))	Lipids and lipid-like molecules
PC(16:0/18:2(9Z,12Z))	Lipids and lipid-like molecules
PA(14:0/22:6(4Z,7Z,10Z,13Z,16Z,19Z))	Lipids and lipid-like molecules
PA(18:1(11Z)/18:3(9Z,12Z,15Z))	Lipids and lipid-like molecules
PA(16:0/20:5(5Z,8Z,11Z,14Z,17Z))	Lipids and lipid-like molecules
PC(18:1(11Z)/18:3(6Z,9Z,12Z))	Lipids and lipid-like molecules
Muricatenol	Lipids and lipid-like molecules
PE(18:3(6Z,9Z,12Z)/18:3(9Z,12Z,15Z))	Lipids and lipid-like molecules
3-(5,6,6-Trimethylbicyclo[2.2.1]hept-1-yl)cyclohexanol	Lipids and lipid-like molecules
Rosifoliol	Lipids and lipid-like molecules
Nerolidol	Lipids and lipid-like molecules
4-(4-Methyl-3-pentenyl)-3-cyclohexene-1-carboxaldehyde	Lipids and lipid-like molecules
Geijerone	Lipids and lipid-like molecules
Norbicycloekasantalal	Lipids and lipid-like molecules
Perillyl aldehyde	Lipids and lipid-like molecules
Methyl (3x,10R)-dihydroxy-11-dodecene-6,8-diynoate 10-glucoside	Lipids and lipid-like molecules
Cynaroside A	Lipids and lipid-like molecules
Cuminaldehyde	Lipids and lipid-like molecules
11,13-Dihydrotaraxinic acid glucosyl ester	Lipids and lipid-like molecules
(23R)-Acetoxytomatine	Lipids and lipid-like molecules
25-Hydroxyvitamin D3-26,23-lactone	Lipids and lipid-like molecules
13-Hydroxyabscisic acid	Lipids and lipid-like molecules
LysoPC(18:3(9Z,12Z,15Z))	Lipids and lipid-like molecules
LysoPE(18:3(9Z,12Z,15Z)/0:0)	Lipids and lipid-like molecules
MG(18:3(6Z,9Z,12Z)/0:0/0:0)	Lipids and lipid-like molecules
Xanthorrhizol	Lipids and lipid-like molecules
Serratol	Lipids and lipid-like molecules
Farnesyl pyrophosphate	Lipids and lipid-like molecules
Beta-Ionone	Lipids and lipid-like molecules
PA(18:2(9Z,12Z)/22:5(7Z,10Z,13Z,16Z,19Z))	Lipids and lipid-like molecules
3-beta-Hydroxy-4-beta-methyl-5-alpha-cholest-7-ene-4-alpha-carbaldehyde	Lipids and lipid-like molecules
PC(16:0/18:3(9Z,12Z,15Z))	Lipids and lipid-like molecules
PE(16:1(9Z)/22:6(4Z,7Z,10Z,13Z,16Z,19Z))	Lipids and lipid-like molecules
PC(18:1(9Z)/18:1(9Z))	Lipids and lipid-like molecules
PC(18:0/18:3(9Z,12Z,15Z))	Lipids and lipid-like molecules
PI(18:2(9Z,12Z)/22:2(13Z,16Z))	Lipids and lipid-like molecules
PC(18:2(9Z,12Z)/18:4(6Z,9Z,12Z,15Z))	Lipids and lipid-like molecules
DG(18:3(6Z,9Z,12Z)/18:3(9Z,12Z,15Z)/0:0)	Lipids and lipid-like molecules
5-Isopropyl-2-(2-methylpropyl)-2-cyclohexen-1-one	Lipids and lipid-like molecules
(Z,Z)-3,6-Dodecadien-1-ol	Lipids and lipid-like molecules
Palmitic amide	Lipids and lipid-like molecules
(±)-Carvomenthol	Lipids and lipid-like molecules
(1R,2S,3S,4R)-p-Menthane-2,3-diol	Lipids and lipid-like molecules
(3xi,5Z)-1,5-Octadien-3-ol	Lipids and lipid-like molecules
2,5-Heptadien-1-ol	Lipids and lipid-like molecules
Humulol	Lipids and lipid-like molecules
Collettiside I	Lipids and lipid-like molecules
Valenciachrome	Lipids and lipid-like molecules
3-Hydroxy-beta-ionone	Lipids and lipid-like molecules
Methyl hydrogen fumarate	Lipids and lipid-like molecules
Succinic acid semialdehyde	Lipids and lipid-like molecules
Pantoyllactone glucoside	Lipids and lipid-like molecules
N5-Hexanoylspermidine	Lipids and lipid-like molecules
Dioscoretine	Lipids and lipid-like molecules
(3b,16b,20R)-Pregn-5-ene-3,16,20-triol 3-glucoside	Lipids and lipid-like molecules
Ilicifolinoside A	Lipids and lipid-like molecules
9,10,13-TriHOME	Lipids and lipid-like molecules
(3beta,22E,24R)-3-Hydroxyergosta-5,8,22-trien-7-one	Lipids and lipid-like molecules
Ganoderic acid W	Lipids and lipid-like molecules
Agavoside A	Lipids and lipid-like molecules
Ethyl 3-hydroxydodecanoate	Lipids and lipid-like molecules
Solasodine	Lipids and lipid-like molecules
Androstenedione	Lipids and lipid-like molecules
Glucosyl passiflorate	Lipids and lipid-like molecules
Fasciculic acid C	Lipids and lipid-like molecules
Theasapogenol A	Lipids and lipid-like molecules
Torvoside G	Lipids and lipid-like molecules
Dehydrovomifoliol	Lipids and lipid-like molecules
3 beta-Hydroxy-5-cholestenoate	Lipids and lipid-like molecules
Tetrahydroaldosterone-3-glucuronide	Lipids and lipid-like molecules
Neoconvallatoxoloside	Lipids and lipid-like molecules
10,20-Dihydroxyeicosanoic acid	Lipids and lipid-like molecules
6-Hydroxyoctadecanoic acid	Lipids and lipid-like molecules
MG(15:0/0:0/0:0)	Lipids and lipid-like molecules
9-HOTE	Lipids and lipid-like molecules
DG(20:5(5Z,8Z,11Z,14Z,17Z)/22:6(4Z,7Z,10Z,13Z,16Z,19Z)/0:0)	Lipids and lipid-like molecules
Nonadecanoic acid	Lipids and lipid-like molecules
Pentadecanol	Lipids and lipid-like molecules
Alpha-Camphorene	Lipids and lipid-like molecules
Polyoxyethylene (600) monoricinoleate	Lipids and lipid-like molecules
(R)-Carvotanacetone	Lipids and lipid-like molecules
Lycopersiconol	Lipids and lipid-like molecules
PS(16:1(9Z)/18:3(9Z,12Z,15Z))	Lipids and lipid-like molecules
PS(18:1(9Z)/18:3(9Z,12Z,15Z))	Lipids and lipid-like molecules
PA(18:3(9Z,12Z,15Z)/22:1(13Z))	Lipids and lipid-like molecules
Melleolide M	Lipids and lipid-like molecules
Ustiloxin B	Lipids and lipid-like molecules
DG(16:0/18:3(6Z,9Z,12Z)/0:0)	Lipids and lipid-like molecules
AS 1-1	Lipids and lipid-like molecules
PS(16:0/18:2(9Z,12Z))	Lipids and lipid-like molecules
PE-NMe(18:1(11Z)/18:3(9Z,12Z,15Z))	Lipids and lipid-like molecules
Asiminenin A	Lipids and lipid-like molecules
DG(18:4(6Z,9Z,12Z,15Z)/18:1(11Z)/0:0)	Lipids and lipid-like molecules
AS 1-2	Lipids and lipid-like molecules
PC(16:1(9Z)/18:4(6Z,9Z,12Z,15Z))	Lipids and lipid-like molecules
TG(8:0/8:0/8:0)	Lipids and lipid-like molecules
Squamotacin	Lipids and lipid-like molecules
Heneicosanoic acid	Lipids and lipid-like molecules
12,15-Epoxy-13,14-dimethyleicosa-12,14,16-trienoic acid	Lipids and lipid-like molecules
Furanodiene	Lipids and lipid-like molecules
2-Hydroxydecanoate	Lipids and lipid-like molecules
Spirolide E	Lipids and lipid-like molecules
Cer(d18:0/16:0)	Lipids and lipid-like molecules
LysoPA(0:0/18:2(9Z,12Z))	Lipids and lipid-like molecules
Cer(d18:0/14:0)	Lipids and lipid-like molecules
(E)-4,8-Dimethyl-1,3,7-nonatriene	Lipids and lipid-like molecules
Alpha-Terpinene	Lipids and lipid-like molecules
3-Epinobilin	Lipids and lipid-like molecules
15-hydroxyicosanoic acid	Lipids and lipid-like molecules
Hericene B	Lipids and lipid-like molecules
LysoPE(20:5(5Z,8Z,11Z,14Z,17Z)/0:0)	Lipids and lipid-like molecules
LysoPE(18:2(9Z,12Z)/0:0)	Lipids and lipid-like molecules
Pregnanetriol	Lipids and lipid-like molecules
(+)-4,11-Eudesmadien-3-one	Lipids and lipid-like molecules
Curcumanolide A	Lipids and lipid-like molecules
Dodecanoic acid	Lipids and lipid-like molecules
Polyoxyethylene 40 monostearate	Lipids and lipid-like molecules
(-)-Carvomenthone	Lipids and lipid-like molecules
(5alpha,6beta,14alpha,20R,22R)-5,6,14,20,27-Pentahydroxy-1-oxowith-24-enolide	Lipids and lipid-like molecules
16-Hydroxy hexadecanoic acid	Lipids and lipid-like molecules
11-Hydroxy-9-tridecenoic acid	Lipids and lipid-like molecules
Myristoleic acid	Lipids and lipid-like molecules
1-Hexanol	Lipids and lipid-like molecules
Heteroxanthin	Lipids and lipid-like molecules
Demissine	Lipids and lipid-like molecules
Solanidine	Lipids and lipid-like molecules
Eremopetasidione	Lipids and lipid-like molecules
Lycoperoside D	Lipids and lipid-like molecules
Camelledionol	Lipids and lipid-like molecules
1-Linoleoylglycerophosphocholine	Lipids and lipid-like molecules
23-Acetoxysoladulcidine	Lipids and lipid-like molecules
Rocuronium	Lipids and lipid-like molecules
25-Hydroxyvitamin D3-26,23-lactol	Lipids and lipid-like molecules
Jurubine	Lipids and lipid-like molecules
Calcipotriol	Lipids and lipid-like molecules
Ganodermic acid P2	Lipids and lipid-like molecules
Spirotaccagenin	Lipids and lipid-like molecules
Undecanedioic acid	Lipids and lipid-like molecules
PE(18:4(6Z,9Z,12Z,15Z)/18:4(6Z,9Z,12Z,15Z))	Lipids and lipid-like molecules
Gibberellin A37 glucosyl ester	Lipids and lipid-like molecules
Caryoptosidic acid	Lipids and lipid-like molecules
Cucurbic acid	Lipids and lipid-like molecules
3-Hydroxytetradecanedioic acid	Lipids and lipid-like molecules
20-Hydroxy-leukotriene B4	Lipids and lipid-like molecules
Taraxinic acid glucosyl ester	Lipids and lipid-like molecules
2,3-Dimethyl-3-hydroxyglutaric acid	Lipids and lipid-like molecules
Glycerophosphocholine	Lipids and lipid-like molecules
3-Isopropylmalate	Lipids and lipid-like molecules
Soyacerebroside I	Lipids and lipid-like molecules
Ethyl (S)-3-hydroxybutyrate glucoside	Lipids and lipid-like molecules
PE(15:0/22:2(13Z,16Z))	Lipids and lipid-like molecules
1,11-Undecanedicarboxylic acid	Lipids and lipid-like molecules
Galactosylglycerol	Lipids and lipid-like molecules
(2R,6x)-7-Methyl-3-methylene-1,2,6,7-octanetetrol 2-glucoside	Lipids and lipid-like molecules
Phytyl diphosphate	Lipids and lipid-like molecules
Methyl nomilinate 17-glucoside	Lipids and lipid-like molecules
Perilloside A	Lipids and lipid-like molecules
Mupirocin	Lipids and lipid-like molecules
Goshonoside F2	Lipids and lipid-like molecules
Erinacine A	Lipids and lipid-like molecules
1-Oleoylglycerophosphoserine	Lipids and lipid-like molecules
LysoPC(15:0)	Lipids and lipid-like molecules
LysoPE(0:0/18:3(9Z,12Z,15Z))	Lipids and lipid-like molecules
Anhydrocinnzeylanol	Lipids and lipid-like molecules
2-hydroxyhexadecanoic acid	Lipids and lipid-like molecules
Asparagoside B	Lipids and lipid-like molecules
Prednisone	Lipids and lipid-like molecules
2(R)-hydroxyicosanoic acid	Lipids and lipid-like molecules
PE(DiMe(11,5)/DiMe(9,3))	Lipids and lipid-like molecules
PC(18:2(9Z,12Z)/18:3(6Z,9Z,12Z))	Lipids and lipid-like molecules
PS(18:3(9Z,12Z,15Z)/18:1(9Z))	Lipids and lipid-like molecules
2(R)-hydroxydocosanoic acid	Lipids and lipid-like molecules
PE-NMe(18:1(11Z)/20:3(5Z,8Z,11Z))	Lipids and lipid-like molecules
PE-NMe(16:0/20:3(5Z,8Z,11Z))	Lipids and lipid-like molecules
17-phenyl-18,19,20-trinor-prostaglandin E2	Lipids and lipid-like molecules
PA(18:1(11Z)/18:3(6Z,9Z,12Z))	Lipids and lipid-like molecules
PA(16:0/18:2(9Z,12Z))	Lipids and lipid-like molecules
Manglupenone	Lipids and lipid-like molecules
PA(16:0/18:3(6Z,9Z,12Z))	Lipids and lipid-like molecules
PA(18:2(9Z,12Z)/18:3(6Z,9Z,12Z))	Lipids and lipid-like molecules
PA(18:2(9Z,12Z)/18:4(6Z,9Z,12Z,15Z))	Lipids and lipid-like molecules
Cerebronic acid	Lipids and lipid-like molecules
PS(18:1(9Z)/18:2(9Z,12Z))	Lipids and lipid-like molecules
PE(18:2(9Z,12Z)/18:3(9Z,12Z,15Z))	Lipids and lipid-like molecules
2-Angeloyl-9-(3-methyl-2E-pentenoyl)-2b,9a-dihydroxy-4Z,10(14)-oplopadien-3-one	Lipids and lipid-like molecules
5-alpha-Dihydrotestosterone glucuronide	Lipids and lipid-like molecules
LysoPC(18:0)	Lipids and lipid-like molecules
1-(6Z,9Z,12Z-octadecatrienoyl)-glycero-3-phosphate	Lipids and lipid-like molecules
PG(16:1(9Z)/22:6(4Z,7Z,10Z,13Z,16Z,19Z))	Lipids and lipid-like molecules
DG(13:0/15:0/0:0)	Lipids and lipid-like molecules
Hexadecanedioic acid	Lipids and lipid-like molecules
7,8-Dihydrovomifoliol 9-[apiosyl-(1->6)-glucoside]	Lipids and lipid-like molecules
Cinncassiol D4 2-glucoside	Lipids and lipid-like molecules
28-[Glucosyl-(1->6)-glucosyl]oleanolic acid 3-arabinoside	Lipids and lipid-like molecules
Capsicoside D	Lipids and lipid-like molecules
Azelaic acid	Lipids and lipid-like molecules
Tomatine	Lipids and lipid-like molecules
Dehydrotomatine	Lipids and lipid-like molecules
Trilostane	Lipids and lipid-like molecules
Mangicrocin	Lipids and lipid-like molecules
Nomilinic acid 17-glucoside	Lipids and lipid-like molecules
Pisumionoside	Lipids and lipid-like molecules
Pisumoside B	Lipids and lipid-like molecules
(1S,2S,4R,8S)-p-Menthane-1,2,8,9-tetrol 2-glucoside	Lipids and lipid-like molecules
3-Hydroxy-4,6-heptadiyne-1-yl 1-glucoside	Lipids and lipid-like molecules
Geniposidic Acid	Lipids and lipid-like molecules
3-Methyladipic acid	Lipids and lipid-like molecules
Monotropein	Lipids and lipid-like molecules
2-Hydroxycaproic acid	Lipids and lipid-like molecules
Indole-3-acetic-acid-O-glucuronide	Lipids and lipid-like molecules
1-(sn-Glycero-3-phospho)-1D-myo-inositol	Lipids and lipid-like molecules
Organic oxygen compounds	80
Octaethylene glycol	Organic oxygen compounds	80
Heptaethylene glycol	Organic oxygen compounds
2,6,6-Trimethyl-1-cyclohexen-1-acetaldehyde	Organic oxygen compounds
5-Isopropylbicyclo[3.1.0]hexan-2-one	Organic oxygen compounds
3-Methyl-2-cyclohexen-1-one	Organic oxygen compounds
5-Nonen-2-one	Organic oxygen compounds
5-Methyl-5-hexen-2-one	Organic oxygen compounds
4-Methyl-2-pentenal	Organic oxygen compounds
N-(1-Deoxy-1-fructosyl)glycine	Organic oxygen compounds
Cis-zeatin-9-N-glucoside	Organic oxygen compounds
Phlorin	Organic oxygen compounds
2-Undecenal	Organic oxygen compounds
3-Methyl-2-cyclopenten-1-one	Organic oxygen compounds
6-Methyl-3-hepten-2-one, trans-	Organic oxygen compounds
7-Methyl-3-octen-2-one	Organic oxygen compounds
Glyceraldehyde	Organic oxygen compounds
5-Hexenyl glucosinolate	Organic oxygen compounds
Niazirinin	Organic oxygen compounds
Fagopyritol B2	Organic oxygen compounds
Xi-4-Hydroxy-4-methyl-2-cyclohexen-1-one	Organic oxygen compounds
3-Furanmethanol glucoside	Organic oxygen compounds
Crosatoside B	Organic oxygen compounds
Isosyringinoside	Organic oxygen compounds
Schidigerasaponin F2	Organic oxygen compounds
Megastigmatrienone	Organic oxygen compounds
THYMOQUINONE	Organic oxygen compounds
Benzoquinoneacetic acid	Organic oxygen compounds
2-Cyclotetradecen-1-one	Organic oxygen compounds
(Z)-9-Cycloheptadecen-1-one	Organic oxygen compounds
Hexaethylene glycol	Organic oxygen compounds
2,2,6,7-Tetramethylbicyclo[4.3.0]nona-1(9),4-diene-7,8-diol	Organic oxygen compounds
Butyl glucosinolate	Organic oxygen compounds
N-Acetyl-5-methoxykynuramine	Organic oxygen compounds
Gamma-Chaconine	Organic oxygen compounds
Isopropyl beta-D-glucoside	Organic oxygen compounds
Niazinin A	Organic oxygen compounds
Verbasoside	Organic oxygen compounds
2,3-Butanediol apiosylglucoside	Organic oxygen compounds
Phloroacetophenone 6'-[xylosyl-(1->6)-glucoside]	Organic oxygen compounds
4-Hydroxy-2,6,6-trimethyl-3-oxo-1,4-cyclohexadiene-1-carboxaldehyde	Organic oxygen compounds
Pantothenic Acid	Organic oxygen compounds
(E)-Casimiroedine	Organic oxygen compounds
Chondroitin D-glucuronate	Organic oxygen compounds
4-Hydroxybenzaldehyde	Organic oxygen compounds
Quinone	Organic oxygen compounds
Sucrose	Organic oxygen compounds
Glucosinalbin 4-(4-acetylrhamnoside)	Organic oxygen compounds
Chlorogenic Acid	Organic oxygen compounds
Benzyl O-[arabinofuranosyl-(1->6)-glucoside]	Organic oxygen compounds
Zizybeoside I	Organic oxygen compounds
Lepidimoic acid	Organic oxygen compounds
Gluconic acid	Organic oxygen compounds
Leonuriside A	Organic oxygen compounds
Trans-p-Menthane-1,7,8-triol 8-glucoside	Organic oxygen compounds
1,3-Dicaffeoylquinic acid	Organic oxygen compounds
L-Ribulose	Organic oxygen compounds
Acaciabiuronic acid	Organic oxygen compounds
Lucuminic acid	Organic oxygen compounds
Domesticoside	Organic oxygen compounds
Quinic acid	Organic oxygen compounds
Shikimic acid	Organic oxygen compounds
Isopropyl apiosylglucoside	Organic oxygen compounds
Etodolac acyl glucuronide	Organic oxygen compounds
2-Phenylethanol glucuronide	Organic oxygen compounds
1-(2-Furanyl)-1-pentanone	Organic oxygen compounds
Octanoylglucuronide	Organic oxygen compounds
De-O-methylsimmondsin	Organic oxygen compounds
3-O-Feruloylquinic acid	Organic oxygen compounds
Jasmolone glucoside	Organic oxygen compounds
3,4-Dihydroxybenzaldehyde	Organic oxygen compounds
Chlorogenoquinone	Organic oxygen compounds
3-Methylpentyl glucosinolate	Organic oxygen compounds
2-O-Benzoyl-D-glucose	Organic oxygen compounds
1,2,10-Trihydroxydihydro-trans-linalyl oxide 7-O-beta-D-glucopyranoside	Organic oxygen compounds
Amylose	Organic oxygen compounds
Glucosamine	Organic oxygen compounds
Ribonolactone	Organic oxygen compounds
Trichloroethanol glucuronide	Organic oxygen compounds
Ethyl beta-D-glucopyranoside	Organic oxygen compounds
1-Deoxy-D-xylulose	Organic oxygen compounds
Organoheterocyclic compounds	69
3alpha,4,5,7alpha-Tetrahydro-5-hydroxy-1H-isoindole-1,3(2H)-dione	Organoheterocyclic compounds	69
Ambronide	Organoheterocyclic compounds
Methylpyrazine	Organoheterocyclic compounds
2-(4-Methyl-5-thiazolyl)ethyl formate	Organoheterocyclic compounds
6-Methylquinoline	Organoheterocyclic compounds
Neocnidilide	Organoheterocyclic compounds
Dihydroactinidiolide	Organoheterocyclic compounds
3-(5-Methyl-2-furyl)prop-2-enal	Organoheterocyclic compounds
Solerol	Organoheterocyclic compounds
6-Methoxymellein	Organoheterocyclic compounds
5-(3E-Pentenyl)tetrahydro-2-oxo-3-furancarboxylic acid	Organoheterocyclic compounds
3-Acetyl-2,7-naphthyridine	Organoheterocyclic compounds
Ethyl maltol	Organoheterocyclic compounds
Indoleacetaldehyde	Organoheterocyclic compounds
Sumiki's acid	Organoheterocyclic compounds
Benzofuran	Organoheterocyclic compounds
4-Pyridoxic acid	Organoheterocyclic compounds
Cytosine	Organoheterocyclic compounds
1-Pyrroline	Organoheterocyclic compounds
Guanine	Organoheterocyclic compounds
1-Methoxy-1H-indole-3-acetonitrile	Organoheterocyclic compounds
3-Methylindole	Organoheterocyclic compounds
Indole	Organoheterocyclic compounds
2,4-Undecadiene-8,10-diynoic acid 2,3-dehydropiperidide	Organoheterocyclic compounds
(5R,6S)-5,6-Epoxy-7-megastigmen-9-one	Organoheterocyclic compounds
Alpha-Bisabolol oxide C	Organoheterocyclic compounds
Diplosporin	Organoheterocyclic compounds
N-Hexadecanoylpyrrolidine	Organoheterocyclic compounds
(±)-Furaneol	Organoheterocyclic compounds
3-Hexylpyridine	Organoheterocyclic compounds
5-Butyl-4-ethyl-2-methyloxazole	Organoheterocyclic compounds
Cis-Quinceoxepane	Organoheterocyclic compounds
D-Glucaro-1,4-lactone	Organoheterocyclic compounds
2-Pentadecylfuran	Organoheterocyclic compounds
2,2,6,6-Tetramethyl-4-piperidinone	Organoheterocyclic compounds
N-despropyl ropinirole	Organoheterocyclic compounds
9'-desmethylgranisetron	Organoheterocyclic compounds
(+/-)-Dihydromintlactone	Organoheterocyclic compounds
N-Acetyl gemifloxacin	Organoheterocyclic compounds
5-Nonyltetrahydro-2-oxo-3-furancarboxylic acid	Organoheterocyclic compounds
Kinetin	Organoheterocyclic compounds
CARBOFURAN	Organoheterocyclic compounds
2,2-Dimethyloxirane	Organoheterocyclic compounds
Hypoxanthine	Organoheterocyclic compounds
Piperidine	Organoheterocyclic compounds
Niacinamide	Organoheterocyclic compounds
Uracil	Organoheterocyclic compounds
5-Hydroxy-2-furoic acid	Organoheterocyclic compounds
2-Pyrrolidinone	Organoheterocyclic compounds
Hv-NCC-1	Organoheterocyclic compounds
2-Carboxy-4-dodecanolide	Organoheterocyclic compounds
Xanthine	Organoheterocyclic compounds
Botryodiplodin	Organoheterocyclic compounds
Flumioxazin	Organoheterocyclic compounds
(R)-Pelletierine	Organoheterocyclic compounds
Dictyoquinazol B	Organoheterocyclic compounds
Gamma-CEHC	Organoheterocyclic compounds
Osmundalactone	Organoheterocyclic compounds
4-Hydroxydebrisoquine	Organoheterocyclic compounds
3-Hydroxymethylantipyrine	Organoheterocyclic compounds
N-Methyl-1H-indole-3-propanamide	Organoheterocyclic compounds
2-Benzofurancarboxaldehyde	Organoheterocyclic compounds
6-Pentyl-1,4-dioxan-2-one	Organoheterocyclic compounds
Brassica napus non-fluorescent chlorophyll catabolite 3	Organoheterocyclic compounds
Eugenitol	Organoheterocyclic compounds
1-Ipomeanol	Organoheterocyclic compounds
L-Tryptophan	Organoheterocyclic compounds
(Z)-5-[(5-Methyl-2-thienyl)methylene]-2(5H)-furanone	Organoheterocyclic compounds
Urocanic acid	Organoheterocyclic compounds
Organic acids and derivatives	57
3-Hydroxyadipic acid	Organic acids and derivatives	57
(S)-2,3,4,5-Tetrahydropiperidine-2-carboxylate	Organic acids and derivatives
L-Glutamine	Organic acids and derivatives
Glutaric acid	Organic acids and derivatives
Tetrahydrodipicolinate	Organic acids and derivatives
2-Aminoheptanedioic acid	Organic acids and derivatives
2-Aminomuconic acid semialdehyde	Organic acids and derivatives
N-Acetyl-L-glutamate 5-semialdehyde	Organic acids and derivatives
D-Pipecolic acid	Organic acids and derivatives
Acetyl tributyl citrate	Organic acids and derivatives
Octadecanamide	Organic acids and derivatives
Arginyl-Aspartic acid	Organic acids and derivatives
Glutathione	Organic acids and derivatives
N8-Acetylspermidine	Organic acids and derivatives
Betaine	Organic acids and derivatives
Hydroxybutyrylglycine	Organic acids and derivatives
L-Isoleucine	Organic acids and derivatives
Hawkinsin	Organic acids and derivatives
L-2-Amino-5-hydroxypentanoic acid	Organic acids and derivatives
N-stearoyl tyrosine	Organic acids and derivatives
Distichonic acid A	Organic acids and derivatives
Glutaminylhistidine	Organic acids and derivatives
Acrylamide	Organic acids and derivatives
Neuromedin B	Organic acids and derivatives
L-Proline	Organic acids and derivatives
Arginyl-Glutamic acid	Organic acids and derivatives
(S)-Argpyrimidine	Organic acids and derivatives
Neuromedin B (1-3)	Organic acids and derivatives
Indicaxanthin	Organic acids and derivatives
L-trans-alpha-Amino-2-carboxycyclopropaneacetic acid	Organic acids and derivatives
L-Threonine	Organic acids and derivatives
Acetylhomoserine	Organic acids and derivatives
L-Pipecolic acid	Organic acids and derivatives
L-2-Amino-3-methylenehexanoic acid	Organic acids and derivatives
L-Histidine	Organic acids and derivatives
3-Hydroxy-4-aminopyridine sulfate	Organic acids and derivatives
Citric acid	Organic acids and derivatives
Tryptophyl-Aspartate	Organic acids and derivatives
Oxoglutaric acid	Organic acids and derivatives
Pyroglutamic acid	Organic acids and derivatives
N-Acetyl-L-alanine	Organic acids and derivatives
N2-Succinyl-L-glutamic acid 5-semialdehyde	Organic acids and derivatives
Bis-gamma-glutamylcysteinylbis-beta-alanine	Organic acids and derivatives
L-Phenylalanine	Organic acids and derivatives
Phomopsin A	Organic acids and derivatives
Hovenine A	Organic acids and derivatives
S-Propyl 1-propanesulfinothioate	Organic acids and derivatives
N-Decanoylglycine	Organic acids and derivatives
Prolylhydroxyproline	Organic acids and derivatives
Na-Hexanoyl-Nb-inosityltryptophan	Organic acids and derivatives
D-1-[(3-Carboxypropyl)amino]-1-deoxyfructose	Organic acids and derivatives
Gamma-Glutamyltryptophan	Organic acids and derivatives
N-Acetylproline	Organic acids and derivatives
L-Serine	Organic acids and derivatives
4-Hydroxy-2-oxoglutaric acid	Organic acids and derivatives
L-Aspartic Acid	Organic acids and derivatives
L-Arginine	Organic acids and derivatives
Phenylpropanoids and polyketides	54
3-(4-Methylphenyl)-2-propenal	Phenylpropanoids and polyketides	54
Rutin	Phenylpropanoids and polyketides
Quercetin 7-rutinoside	Phenylpropanoids and polyketides
Caffeic Acid	Phenylpropanoids and polyketides
2-Hydroxycinnamic acid	Phenylpropanoids and polyketides
(E)-1-Cinnamoylpyrrolidine	Phenylpropanoids and polyketides
Kaempferol 3-(2G-apiosylrobinobioside)	Phenylpropanoids and polyketides
N-cis-Caffeoyltyramine	Phenylpropanoids and polyketides
Quercetin	Phenylpropanoids and polyketides
Astragalin	Phenylpropanoids and polyketides
Apigenin 7-[rhamnosyl-(1->2)-galacturonide]	Phenylpropanoids and polyketides
Quercitrin	Phenylpropanoids and polyketides
Isorhamnetin	Phenylpropanoids and polyketides
Cinnatriacetin A	Phenylpropanoids and polyketides
Kaempferol	Phenylpropanoids and polyketides
Trans-Grandmarin	Phenylpropanoids and polyketides
Austalide L	Phenylpropanoids and polyketides
D6-Ambrettolide	Phenylpropanoids and polyketides
Allivicin	Phenylpropanoids and polyketides
Demeclocycline	Phenylpropanoids and polyketides
Pectachol	Phenylpropanoids and polyketides
Pelargonidin 3-sophoroside	Phenylpropanoids and polyketides
Clausarinol	Phenylpropanoids and polyketides
3,6,7-Trihydroxy-4'-methoxyflavone 7-rhamnoside	Phenylpropanoids and polyketides
Eriodictyol	Phenylpropanoids and polyketides
Genistein	Phenylpropanoids and polyketides
3-p-Coumaroyl-1,5-quinolactone	Phenylpropanoids and polyketides
Dolineone	Phenylpropanoids and polyketides
Amritoside	Phenylpropanoids and polyketides
M-Coumaric acid	Phenylpropanoids and polyketides
Coumarin	Phenylpropanoids and polyketides
Wampetin	Phenylpropanoids and polyketides
Alpha-(1,2-Dihydroxyethyl)-1,2,3,4-tetrahydro-7-hydroxy-9-methoxy-3,4-dioxocyclopenta[c][1]benzopyran-6-acetaldehyde	Phenylpropanoids and polyketides
Camelliaside B	Phenylpropanoids and polyketides
Hydroxyphenyllactic acid	Phenylpropanoids and polyketides
Limocitrol	Phenylpropanoids and polyketides
N-trans-Feruloyloctopamine	Phenylpropanoids and polyketides
Eremopetasitenin B2	Phenylpropanoids and polyketides
(-)-Epigallocatechin 3-cinnamate	Phenylpropanoids and polyketides
11-Methoxynoryangonin	Phenylpropanoids and polyketides
Kaempferol 3-(6-[4-glucosyl-p-coumaryl]glucosyl)(1->2)-rhamnoside	Phenylpropanoids and polyketides
3''-O-Caffeoylcosmosiin	Phenylpropanoids and polyketides
Dihydromorelloflavone	Phenylpropanoids and polyketides
5,8-Dihydroxy-3-(4-hydroxybenzyl)-7-methoxy-4-chromanone	Phenylpropanoids and polyketides
Hesperetin	Phenylpropanoids and polyketides
N-cis-Feruloyltyramine	Phenylpropanoids and polyketides
N-(p-Hydroxyphenyl)ethyl p-hydroxycinnamide	Phenylpropanoids and polyketides
Spinacetin 3-(2''-feruloylgentiobioside)	Phenylpropanoids and polyketides
Ranupenin 3-rutinoside	Phenylpropanoids and polyketides
Calendoflavoside	Phenylpropanoids and polyketides
6''-Acetylliquiritin	Phenylpropanoids and polyketides
Spinacetin 3-[p-coumaroyl-(->2)-glucosyl-(1->6)-[apiosyl-(1->2)]-glucoside]	Phenylpropanoids and polyketides
Sinapic acid	Phenylpropanoids and polyketides
Liquiritigenin 4'-[3-acetylapiosyl-(1->2)-glucoside]	Phenylpropanoids and polyketides
Benzenoids	33
Phenylacetaldehyde	Benzenoids	33
Phenylpyruvic acid	Benzenoids
(R)-Pterosin B	Benzenoids
Juglone	Benzenoids
Kukoamine A	Benzenoids
Benzaldehyde	Benzenoids
1,4,5-Naphthalenetriol	Benzenoids
2,4-Dimethylbenzaldehyde	Benzenoids
Isoplumbagin	Benzenoids
1,3-Diisopropylbenzene	Benzenoids
P-Isopropylphenol	Benzenoids
Alpha-Methylstyrene	Benzenoids
Styrene	Benzenoids
2-hydroxymexiletine	Benzenoids
4-Propylphenol	Benzenoids
P-Mentha-1,3,5,8-tetraene	Benzenoids
4-Ethylphenol	Benzenoids
P-Octopamine	Benzenoids
Monobutylphthalate	Benzenoids
Toluene	Benzenoids
Gallic acid	Benzenoids
Kukoamine B	Benzenoids
5-Methoxysalicylic acid	Benzenoids
Gentisic acid	Benzenoids
Homoveratric acid	Benzenoids
4-Nitrophenol	Benzenoids
N-Undecylbenzenesulfonic acid	Benzenoids
Sirolimus	Benzenoids
5'-(3'-Methoxy-4'-hydroxyphenyl)-gamma-valerolactone	Benzenoids
Vanillin	Benzenoids
Vanillin acetate	Benzenoids
Uralenneoside	Benzenoids
4-(Butoxymethyl)phenol	Benzenoids
Nucleosides, nucleotides, and analogues	11
5-Fluorodeoxyuridine monophosphate	Nucleosides, nucleotides, and analogues	11
Guanosine	Nucleosides, nucleotides, and analogues
Biotinyl-5'-AMP	Nucleosides, nucleotides, and analogues
Deoxyinosine	Nucleosides, nucleotides, and analogues
5-Fluorouridine	Nucleosides, nucleotides, and analogues
UDP-D-apiose	Nucleosides, nucleotides, and analogues
Uridine	Nucleosides, nucleotides, and analogues
Xanthosine	Nucleosides, nucleotides, and analogues
ADP	Nucleosides, nucleotides, and analogues
Adenosine monophosphate	Nucleosides, nucleotides, and analogues
Cytidine	Nucleosides, nucleotides, and analogues
Organic nitrogen compounds	10
Dehydrophytosphingosine	Organic nitrogen compounds	10
Phytosphingosine	Organic nitrogen compounds
Putrescine	Organic nitrogen compounds
Cyclohexylammonium	Organic nitrogen compounds
Histamine	Organic nitrogen compounds
Spermine	Organic nitrogen compounds
Sphinganine	Organic nitrogen compounds
L-Histidinol	Organic nitrogen compounds
Betaine aldehyde	Organic nitrogen compounds
Choline	Organic nitrogen compounds
Hydrocarbons	4
2-Isopropyl-1,4-hexadiene	Hydrocarbons	4
3-Methylcyclopentene	Hydrocarbons
1,2-Dimethyl-4-(6-methyl-4-heptenyl)-1,3-cyclohexadiene	Hydrocarbons
2-Methyl-1,3-cyclohexadiene	Hydrocarbons
Alkaloids and derivatives	2
3-alpha-Androstanediol glucuronide	Alkaloids and derivatives	2
2-Hydroxycarbamazepine	Alkaloids and derivatives
Lignans, neolignans and related compounds	1
Isotetrandrine	Lignans, neolignans and related compounds	1
Organic 1,3-dipolar compounds	1
1-Nitroheptane	Organic 1,3-dipolar compounds	1
