# Supplementary material for: Effect of SlSAHH2 on metabolites in over-expressed and wild-type tomato fruit
Source: PeerJ. 2024 May 29;12:e17466. doi: 10.7717/peerj.17466 (PMC11143970; doi:10.7717/peerj.17466)
Supplement: Supplemental Information 3 [file peerj-12-17466-s003.xlsx]

## Sheet: 5OEvsWT
Details information of the different metabolites of OE-5# vs WT（Corresponding volcano map）
Metabolite	Metab ID	Significant	Regulate	Mode	VIP_PLS-DA	FC(Br_5OE/Br_WT)	P_value	M/Z	Retention time	Formula	VIP_pred_OPLS-DA
(2R,6x)-7-Methyl-3-methylene-1,2,6,7-octanetetrol 2-glucoside	metab_6742	yes	up	neg	2.6973	1.1274	0.002618	365.181	3.00578	C16H30O9	2.8544
(R)-Pelletierine	metab_6799	yes	up	neg	1.337	1.0377	0.03628	186.113	3.33895	C8H15NO	1.3821
1-Oleoylglycerophosphoserine	metab_7290	yes	up	neg	1.7126	1.0677	0.04933	544.266	8.49678	C24H46NO9P	1.7785
2(R)-hydroxydocosanoic acid	metab_7537	yes	up	neg	2.1579	1.0925	0.01264	355.322	10.9858	C22H44O3	2.2503
25-Hydroxyvitamin D3-26,23-lactol	metab_4338	yes	up	pos	1.5739	1.0506	0.03924	472.34	4.136	C27H42O4	1.6345
2-Aminomuconic acid semialdehyde	metab_305	yes	up	pos	1.2869	1.0292	0.02895	124.039	1.32363	C6H7NO3	1.3508
2-O-Benzoyl-D-glucose	metab_9268	yes	up	neg	1.7652	1.0723	0.01046	329.088	2.54057	C13H16O7	1.8536
3-Isopropylmalate	metab_5806	yes	up	neg	2.4425	1.098	0.003785	351.129	2.85058	C7H12O5	2.598
4-Hydroxy-2,6,6-trimethyl-3-oxo-1,4-cyclohexadiene-1-carboxaldehyde	metab_4843	yes	up	pos	2.0432	1.1039	0.02656	145.064	2.48288	C10H12O3	2.1605
5-Methoxysalicylic acid	metab_6531	yes	up	neg	1.4711	1.065	0.03105	167.034	2.16398	C8H8O4	1.5504
6-Methylquinoline	metab_418	yes	up	pos	2.3489	1.0864	0.02907	144.08	2.48288	C10H9N	2.4919
6-O-Methylguanine	metab_5111	yes	up	pos	2.1959	1.0972	0.009435	166.072	2.00547	C6H7N5O	2.329
Acetylhomoserine	metab_5478	yes	up	pos	1.7041	1.0652	0.02886	162.075	1.36352	C6H11NO4	1.7794
Agavoside A	metab_1958	yes	up	pos	1.4988	1.0407	0.0442	634.392	4.136	C33H52O9	1.5537
Arginyl-Aspartic acid	metab_945	yes	up	pos	4.6457	1.6542	0.006939	307.175	2.61143	C10H19N5O5	4.8739
Arginyl-Glutamic acid	metab_4764	yes	up	pos	3.6018	1.4344	0.006677	321.191	2.67657	C11H21N5O5	3.7719
Biotinyl-5'-AMP	metab_1490	yes	up	pos	1.9098	1.0934	0.04991	538.125	1.98323	C20H28N7O9PS	2.0218
Botryodiplodin	metab_6559	yes	up	neg	1.4657	1.0448	0.004111	189.076	2.25298	C7H12O3	1.5582
Cyclohexylammonium	metab_1641	yes	up	pos	2.1112	1.0839	0.03509	145.084	2.48288	C6H14N+	2.2363
Cytosine	metab_1272	yes	up	pos	2.3429	1.0938	0.008863	112.051	1.305	C4H5N3O	2.4759
Dehydrotomatine	metab_8894	yes	up	neg	1.2605	1.0296	0.02807	1030.52	4.22942	C50H81NO21	1.3105
Ethyl beta-D-glucopyranoside	metab_9698	yes	up	neg	1.8619	1.0468	0.004752	245.043	1.29768	C8H16O6	1.9577
Ferulic acid	metab_9297	yes	up	neg	3.4223	1.3306	0.01137	193.05	2.47412	C10H10O4	3.6416
Glucosyl passiflorate	metab_1981	yes	up	pos	1.2269	1.0252	0.01959	738.439	4.24682	C37H60O12	1.2758
Glycerophosphocholine	metab_5560	yes	up	pos	1.5398	1.0391	0.04126	258.109	1.28548	C8H20NO6P	1.5969
Guanine	metab_1296	yes	up	pos	1.7357	1.0527	0.01321	152.056	1.36352	C5H5N5O	1.8323
Guanosine	metab_1133	yes	up	pos	2.3858	1.125	0.01058	284.098	1.7187	C10H13N5O5	2.5137
Hesperetin	metab_8759	yes	up	neg	2.9654	1.3057	0.02079	301.071	5.099	C16H14O6	3.0959
Homoveratric acid	metab_6659	yes	up	neg	2.0634	1.1232	0.04831	195.065	2.60693	C10H12O4	2.0972
Ilicifolinoside A	metab_1724	yes	up	pos	2.2065	1.0863	0.007859	287.109	2.87518	C11H20O7	2.357
Isopropyl apiosylglucoside	metab_6723	yes	up	neg	1.9757	1.0778	0.006101	335.135	2.89482	C14H26O10	2.0883
Juglone	metab_949	yes	up	pos	3.172	1.2056	0.007821	207.064	2.40055	C10H6O3	3.3121
Kinetin	metab_4936	yes	up	pos	2.2822	1.096	0.004977	448.192	2.2702	C10H9N5O	2.4159
LPC(16:0)	metab_7314	yes	up	neg	1.9923	1.0703	0.01438	540.33	8.90185	C24H50NO7P	2.1182
LPC(18:3)	metab_8534	yes	up	neg	1.8731	1.068	0.0276	562.315	7.91235	C26H48NO7P	1.9759
LPE(16:0)	metab_7327	yes	up	neg	2.2735	1.089	0.008148	452.278	9.01438	C21H44NO7P	2.4068
L-Serine	metab_9562	yes	up	neg	2.3967	1.147	0.01115	150.041	1.7201	C3H7NO3	2.5402
L-Threonine	metab_5461	yes	up	pos	1.677	1.0561	0.01592	120.065	1.38268	C4H9NO3	1.7283
LysoPC(15:0)	metab_7312	yes	up	neg	2.0073	1.0748	0.01404	480.309	8.90185	C23H48NO7P	2.1349
LysoPC(18:0)	metab_8385	yes	up	neg	1.6927	1.0741	0.02455	568.362	9.57747	C26H54NO7P	1.824
LysoPC(18:3(9Z,12Z,15Z))	metab_596	yes	up	pos	1.9253	1.0627	0.0206	518.322	7.90922	C26H48NO7P	2.0291
LysoPE(18:2(9Z,12Z)/0:0)	metab_3811	yes	up	pos	1.7879	1.0585	0.03707	478.291	8.5113	C23H44NO7P	1.8552
LysoPE(18:3(9Z,12Z,15Z)/0:0)	metab_600	yes	up	pos	2.3568	1.1037	0.006804	476.275	8.03973	C23H42NO7P	2.4806
LysoPE(20:5(5Z,8Z,11Z,14Z,17Z)/0:0)	metab_3810	yes	up	pos	1.7782	1.0631	0.03851	500.273	8.5113	C25H42NO7P	1.8413
Mangicrocin	metab_8958	yes	up	neg	2.3653	1.1566	0.02085	931.251	3.82857	C45H50O19	2.4621
N-Hexadecanoylpyrrolidine	metab_2268	yes	up	pos	2.4086	1.149	0.02867	327.336	7.75862	C20H39NO	2.5676
PA(14:0/22:6(4Z,7Z,10Z,13Z,16Z,19Z))	metab_171	yes	up	pos	1.0623	1.0175	0.02567	693.443	13.2834	C39H65O8P	1.1083
PA(18:2(9Z,12Z)/18:3(6Z,9Z,12Z))	metab_8123	yes	up	neg	1.4966	1.0388	0.02783	693.45	12.5745	C39H67O8P	1.5478
PA(18:2(9Z,12Z)/18:4(6Z,9Z,12Z,15Z))	metab_8147	yes	up	neg	2.0637	1.079	0.004533	691.434	12.0161	C39H65O8P	2.1638
PA(18:4(6Z,9Z,12Z,15Z)/20:4(5Z,8Z,11Z,14Z))	metab_169	yes	up	pos	1.5462	1.0351	0.01573	717.443	12.5378	C41H65O8P	1.6186
PC(16:0/0:0)[U]	metab_825	yes	up	pos	2.0913	1.0635	0.005789	496.338	8.89792	C24H50NO7P	2.223
PE(16:0/0:0)	metab_140	yes	up	pos	2.3048	1.0896	0.007708	454.291	9.00643	C21H44NO7P	2.4268
Pregnanetriol	metab_3812	yes	up	pos	1.5623	1.0443	0.04651	337.272	8.5113	C21H36O3	1.621
Suberic acid	metab_25	yes	up	pos	2.0588	1.0777	0.003845	157.085	2.89737	C8H14O4	2.1632
Uracil	metab_5462	yes	up	pos	2.2049	1.1136	0.02607	113.035	1.38268	C4H4N2O2	2.3176
Uridine	metab_6414	yes	up	neg	3.6722	1.4489	0.01058	243.062	1.63305	C9H12N2O6	3.874
Xanthine	metab_6476	yes	up	neg	2.5114	1.3069	0.02914	151.025	1.98623	C5H4N4O2	2.6707
Xanthosine	metab_6480	yes	up	neg	2.7483	1.2677	0.017	283.068	1.98623	C10H12N4O6	2.927
(±)-Ibuprofen	metab_19	yes	down	pos	1.4429	0.9648	0.007263	189.127	2.98628	C13H18O2	1.5376
(5R,6S)-5,6-Epoxy-7-megastigmen-9-one	metab_1956	yes	down	pos	2.1613	0.9188	0.007638	209.153	4.136	C13H20O2	2.2846
(E)-2-Hexenyl (E)-7,9-decadienoate	metab_127	yes	down	pos	2.1813	0.9215	0.01517	251.2	7.43542	C16H26O2	2.3223
(S)-2,3,4,5-Tetrahydropiperidine-2-carboxylate	metab_14	yes	down	pos	1.5704	0.9601	0.006096	160.096	1.305	C6H9NO2	1.6531
13-Hydroxyabscisic acid	metab_582	yes	down	pos	1.1942	0.9803	0.009581	281.137	6.95923	C15H20O5	1.2522
2,5-Dimethylbenzaldehyde	metab_578	yes	down	pos	1.2118	0.9775	0.01211	135.08	6.95923	C9H10O	1.2733
2-Aminoheptanedioic acid	metab_299	yes	down	pos	2.5661	0.8888	0.005115	176.091	1.2657	C7H13NO4	2.7171
2-Hydroxydecanoate	metab_3597	yes	down	pos	1.2424	0.979	0.001981	221.174	9.93627	C10H20O3	1.2986
2-Indanone	metab_3990	yes	down	pos	1.1477	0.9747	0.01941	133.064	6.95923	C9H8O	1.2029
3,4-Dihydroxyphenylpropanoate	metab_6658	yes	down	neg	1.6858	0.9434	0.02721	181.05	2.60693	C9H10O4	1.6596
3,4-Dimethylstyrene	metab_1868	yes	down	pos	1.4167	0.9569	0.01544	133.101	3.62748	C10H12	1.5126
3-amino-2-naphthoic acid	metab_242	yes	down	pos	2.1345	0.9346	0.0327	188.07	2.40055	C11H9NO2	2.2105
3-Hydroxy-beta-ionone	metab_889	yes	down	pos	2.2427	0.9081	0.002084	209.153	3.53885	C13H20O2	2.3849
3-Methylindole	metab_1628	yes	down	pos	1.762	0.9427	0.02426	132.08	2.40055	C9H9N	1.8338
4-Ethylphenol	metab_4666	yes	down	pos	1.087	0.9693	0.04319	123.08	2.98628	C8H10O	1.168
4-formyl Indole	metab_4868	yes	down	pos	2.1295	0.9298	0.02987	146.06	2.40055	C9H7NO	2.2079
4-Propylphenol	metab_4355	yes	down	pos	1.4533	0.9484	0.02977	137.096	4.06995	C9H12O	1.5416
7,8-Dihydrovomifoliol 9-[apiosyl-(1->6)-glucoside]	metab_8717	yes	down	neg	1.5066	0.9481	0.03662	519.244	5.4745	C24H40O12	1.5687
8-{(1s,5r)-4-Oxo-5-[(2z)-2-penten-1-yl]-2-cyclopenten-1-yl}octanoic acid	metab_2064	yes	down	pos	1.9535	0.9209	0.00909	275.199	5.03133	C18H28O3	2.0742
Alpha-Methylstyrene	metab_3991	yes	down	pos	1.2297	0.9801	0.008669	119.085	6.95923	C9H10	1.2879
Austalide L	metab_2217	yes	down	pos	1.0176	0.9806	0.02795	446.252	6.95923	C25H32O6	1.0808
Betaine aldehyde	metab_4867	yes	down	pos	2.1985	0.9078	0.03348	147.063	2.40055	C5H12NO+	2.277
Beta-Ionone	metab_624	yes	down	pos	1.206	0.9788	0.001571	193.158	9.93627	C13H20O	1.2601
Cinncassiol D4 2-glucoside	metab_8741	yes	down	neg	1.6288	0.9493	0.02521	495.26	5.18722	C26H42O10	1.7212
Crosatoside B	metab_1855	yes	down	pos	1.676	0.9435	0.03801	429.171	3.56047	C20H30O11	1.7862
Cynaroside A	metab_421	yes	down	pos	1.4661	0.972	0.001712	467.187	2.46295	C21H32O10	1.5103
Distichonic acid A	metab_2215	yes	down	pos	1.1525	0.9765	0.01418	295.116	6.95923	C10H18N2O8	1.2152
Domesticoside	metab_6660	yes	down	neg	1.9465	0.9314	0.0281	343.103	2.60693	C15H20O9	1.9053
Ethyl 3-hydroxydodecanoate	metab_1959	yes	down	pos	2.1783	0.8844	0.03643	262.237	4.15832	C14H28O3	2.2174
Etodolac acyl glucuronide	metab_6817	yes	down	neg	2.7172	0.8436	0.004525	444.166	3.40557	C23H29NO9	2.8497
L-Tryptophan	metab_9340	yes	down	neg	2.1152	0.9105	0.0421	203.082	2.40825	C11H12N2O2	2.1836
Megastigmatrienone	metab_1988	yes	down	pos	2.2482	0.8959	0.01758	191.142	4.31317	C13H18O	2.3693
Monobutylphthalate	metab_4863	yes	down	pos	2.3231	0.8814	0.03336	261.054	2.40055	C12H14O4	2.4025
N8-Acetylspermidine	metab_1230	yes	down	pos	2.3933	0.8791	0.01626	188.175	1.18465	C9H21N3O	2.5186
Niazirinin	metab_1095	yes	down	pos	2.157	0.9218	0.003832	339.154	1.59422	C16H19NO6	2.2756
N-stearoyl tyrosine	metab_1889	yes	down	pos	2.5035	0.8748	0.01684	448.34	3.75967	C27H45NO4	2.6429
P-Coumaric acid	metab_588	yes	down	pos	2.3842	0.8914	0.0232	147.044	7.43542	C9H8O3	2.5336
Phloroacetophenone 6'-[xylosyl-(1->6)-glucoside]	metab_4824	yes	down	pos	1.7205	0.9367	0.02967	455.15	2.54682	C21H30O13	1.8028
Phytyl diphosphate	metab_6826	yes	down	neg	1.8209	0.9168	0.02364	493.193	3.4723	C20H42O7P2	1.9323
P-Mentha-1,3,5,8-tetraene	metab_4356	yes	down	pos	1.2842	0.9596	0.04706	133.101	4.06995	C10H12	1.3695
Prolylhydroxyproline	metab_9329	yes	down	neg	3.7713	0.6238	0.002498	227.103	2.4305	C10H16N2O4	4.0268
PS(16:0/18:2(9Z,12Z))	metab_3260	yes	down	pos	1.7652	0.9452	0.01325	777.545	11.4866	C40H74NO10P	1.8749
TG(8:0/8:0/8:0)	metab_3419	yes	down	pos	4.5752	0.6682	5.491e-05	493.348	10.6075	C27H50O6	4.8328
Thiazolidine-4-carboxylic acid	metab_5550	yes	down	pos	2.7716	0.8658	0.002568	134.027	1.305	C4H7NO2S	2.9111
Zizybeoside I	metab_5814	yes	down	neg	1.8033	0.9267	0.03749	431.156	2.54057	C19H28O11	1.8551
