# Supplementary material for: Effect of SlSAHH2 on metabolites in over-expressed and wild-type tomato fruit
Source: PeerJ. 2024 May 29;12:e17466. doi: 10.7717/peerj.17466 (PMC11143970; doi:10.7717/peerj.17466)
Supplement: Supplemental Information 4 [file peerj-12-17466-s004.xlsx]

## Sheet: WTvs5OE
Detail information of metabolites in OE-5# vs WT group classified in the HMDB database
Metabolite	KEGG Pathway ID	KEGG Pathway Description	KEGG Compound ID	Mode	KEGG Compound First Category	KEGG Compound Second Category	KEGG Pathway First Category	KEGG Pathway Second Category	HMDB Superclass	HMDB Class	HMDB Subclass
(S)-2,3,4,5-Tetrahydropiperidine-2-carboxylate	-	-	-	pos	-	-	-	-	Organic acids and derivatives	Carboxylic acids and derivatives	Amino acids, peptides, and analogues
(±)-Ibuprofen	-	-	-	pos	-	-	-	-	-	-	-
Suberic acid	-	-	C08278	pos	Organic acids	Carboxylic acids	-	-	Lipids and lipid-like molecules	Fatty Acyls	Fatty acids and conjugates
(E)-2-Hexenyl (E)-7,9-decadienoate	-	-	-	pos	-	-	-	-	-	-	-
PE(16:0/0:0)	-	-	-	pos	-	-	-	-	-	-	-
PA(18:4(6Z,9Z,12Z,15Z)/20:4(5Z,8Z,11Z,14Z))	-	-	-	pos	-	-	-	-	Lipids and lipid-like molecules	Glycerophospholipids	Glycerophosphates
PA(14:0/22:6(4Z,7Z,10Z,13Z,16Z,19Z))	-	-	-	pos	-	-	-	-	Lipids and lipid-like molecules	Glycerophospholipids	Glycerophosphates
3-amino-2-naphthoic acid	-	-	-	pos	-	-	-	-	-	-	-
2-Aminoheptanedioic acid	-	-	-	pos	-	-	-	-	Organic acids and derivatives	Carboxylic acids and derivatives	Amino acids, peptides, and analogues
2-Aminomuconic acid semialdehyde	map01100;map00380	Metabolic pathways; Tryptophan metabolism	C03824	pos	-	-	Metabolism;Metabolism	Global and overview maps;Amino acid metabolism	Organic acids and derivatives	Carboxylic acids and derivatives	Amino acids, peptides, and analogues
6-Methylquinoline	-	-	-	pos	-	-	-	-	Organoheterocyclic compounds	Quinolines and derivatives	Not Available
Cynaroside A	-	-	-	pos	-	-	-	-	Lipids and lipid-like molecules	Prenol lipids	Terpene lactones
2,5-Dimethylbenzaldehyde	-	-	-	pos	-	-	-	-	-	-	-
13-Hydroxyabscisic acid	-	-	-	pos	-	-	-	-	Lipids and lipid-like molecules	Prenol lipids	Sesquiterpenoids
P-Coumaric acid	map01100;map01110;map00130;map00998;map00950;map00940;map00350	Metabolic pathways; Biosynthesis of secondary metabolites; Ubiquinone and other terpenoid-quinone biosynthesis; Biosynthesis of various secondary metabolites - part 2; Isoquinoline alkaloid biosynthesis; Phenylpropanoid biosynthesis; Tyrosine metabolism	C00811	pos	-	-	Metabolism;Metabolism;Metabolism;Metabolism;Metabolism;Metabolism;Metabolism	Global and overview maps;Global and overview maps;Metabolism of cofactors and vitamins;Biosynthesis of other secondary metabolites;Biosynthesis of other secondary metabolites;Biosynthesis of other secondary metabolites;Amino acid metabolism	-	-	-
LysoPC(18:3(9Z,12Z,15Z))	-	-	-	pos	-	-	-	-	Lipids and lipid-like molecules	Glycerophospholipids	Glycerophosphocholines
LysoPE(18:3(9Z,12Z,15Z)/0:0)	-	-	-	pos	-	-	-	-	Lipids and lipid-like molecules	Glycerophospholipids	Glycerophosphoethanolamines
Beta-Ionone	-	-	C12287	pos	-	-	-	-	Lipids and lipid-like molecules	Prenol lipids	Sesquiterpenoids
PC(16:0/0:0)[U]	-	-	-	pos	-	-	-	-	-	-	-
3-Hydroxy-beta-ionone	-	-	-	pos	-	-	-	-	Lipids and lipid-like molecules	Prenol lipids	Sesquiterpenoids
Arginyl-Aspartic acid	-	-	-	pos	-	-	-	-	Organic acids and derivatives	Carboxylic acids and derivatives	Amino acids, peptides, and analogues
Juglone	-	-	C03840	pos	-	-	-	-	Benzenoids	Naphthalenes	Naphthoquinones
Niazirinin	-	-	-	pos	-	-	-	-	Organic oxygen compounds	Organooxygen compounds	Carbohydrates and carbohydrate conjugates
Guanosine	map01100;map02010;map00230	Metabolic pathways; ABC transporters; Purine metabolism	C00387	pos	Nucleic acids	Nucleosides	Metabolism;Environmental Information Processing;Metabolism	Global and overview maps;Membrane transport;Nucleotide metabolism	Nucleosides, nucleotides, and analogues	Purine nucleosides	Not Available
N8-Acetylspermidine	-	-	C01029	pos	-	-	-	-	Organic acids and derivatives	Carboximidic acids and derivatives	Carboximidic acids
Cytosine	map00240;map01100	Pyrimidine metabolism; Metabolic pathways	C00380	pos	Nucleic acids	Bases	Metabolism;Metabolism	Nucleotide metabolism;Global and overview maps	Organoheterocyclic compounds	Diazines	Pyrimidines and pyrimidine derivatives
Guanine	map01100;map00230	Metabolic pathways; Purine metabolism	C00242	pos	Nucleic acids	Bases	Metabolism;Metabolism	Global and overview maps;Nucleotide metabolism	Organoheterocyclic compounds	Imidazopyrimidines	Purines and purine derivatives
Biotinyl-5'-AMP	map01100;map00780	Metabolic pathways; Biotin metabolism	C05921	pos	-	-	Metabolism;Metabolism	Global and overview maps;Metabolism of cofactors and vitamins	Nucleosides, nucleotides, and analogues	Purine nucleotides	Purine ribonucleotides
3-Methylindole	map00380	Tryptophan metabolism	C08313	pos	-	-	Metabolism	Amino acid metabolism	Organoheterocyclic compounds	Indoles and derivatives	Indoles
Cyclohexylammonium	-	-	-	pos	-	-	-	-	Organic nitrogen compounds	Organonitrogen compounds	Cyclohexylamines
Ilicifolinoside A	-	-	-	pos	-	-	-	-	Lipids and lipid-like molecules	Fatty Acyls	Fatty acyl glycosides
Crosatoside B	-	-	-	pos	-	-	-	-	Organic oxygen compounds	Organooxygen compounds	Carbohydrates and carbohydrate conjugates
3,4-Dimethylstyrene	-	-	-	pos	-	-	-	-	-	-	-
N-stearoyl tyrosine	-	-	-	pos	-	-	-	-	Organic acids and derivatives	Carboxylic acids and derivatives	Amino acids, peptides, and analogues
(5R,6S)-5,6-Epoxy-7-megastigmen-9-one	-	-	-	pos	-	-	-	-	Organoheterocyclic compounds	Oxepanes	Not Available
Agavoside A	-	-	C08885	pos	-	-	-	-	Lipids and lipid-like molecules	Steroids and steroid derivatives	Steroidal glycosides
Ethyl 3-hydroxydodecanoate	-	-	-	pos	-	-	-	-	Lipids and lipid-like molecules	Fatty Acyls	Fatty alcohols
Glucosyl passiflorate	-	-	-	pos	-	-	-	-	Lipids and lipid-like molecules	Prenol lipids	Terpene glycosides
Megastigmatrienone	-	-	-	pos	-	-	-	-	Organic oxygen compounds	Organooxygen compounds	Carbonyl compounds
8-{(1s,5r)-4-Oxo-5-[(2z)-2-penten-1-yl]-2-cyclopenten-1-yl}octanoic acid	-	-	-	pos	-	-	-	-	-	-	-
Distichonic acid A	-	-	-	pos	-	-	-	-	Organic acids and derivatives	Carboxylic acids and derivatives	Amino acids, peptides, and analogues
Austalide L	-	-	-	pos	-	-	-	-	Phenylpropanoids and polyketides	Flavonoids	Flavones
N-Hexadecanoylpyrrolidine	-	-	-	pos	-	-	-	-	Organoheterocyclic compounds	Pyrrolidines	N-acylpyrrolidines
PS(16:0/18:2(9Z,12Z))	-	-	-	pos	-	-	-	-	Lipids and lipid-like molecules	Glycerophospholipids	Glycerophosphoserines
TG(8:0/8:0/8:0)	-	-	C13044	pos	-	-	-	-	Lipids and lipid-like molecules	Glycerolipids	Triradylcglycerols
2-Hydroxydecanoate	-	-	-	pos	-	-	-	-	Lipids and lipid-like molecules	Fatty Acyls	Fatty acids and conjugates
LysoPE(20:5(5Z,8Z,11Z,14Z,17Z)/0:0)	-	-	-	pos	-	-	-	-	Lipids and lipid-like molecules	Glycerophospholipids	Glycerophosphoethanolamines
LysoPE(18:2(9Z,12Z)/0:0)	-	-	-	pos	-	-	-	-	Lipids and lipid-like molecules	Glycerophospholipids	Glycerophosphoethanolamines
Pregnanetriol	-	-	-	pos	-	-	-	-	Lipids and lipid-like molecules	Steroids and steroid derivatives	Pregnane steroids
2-Indanone	-	-	C07727	pos	-	-	-	-	-	-	-
Alpha-Methylstyrene	-	-	C14395	pos	-	-	-	-	Benzenoids	Benzene and substituted derivatives	Phenylpropenes
25-Hydroxyvitamin D3-26,23-lactol	-	-	-	pos	-	-	-	-	Lipids and lipid-like molecules	Steroids and steroid derivatives	Vitamin D and derivatives
4-Propylphenol	-	-	C14311	pos	-	-	-	-	Benzenoids	Benzene and substituted derivatives	Phenylpropanes
P-Mentha-1,3,5,8-tetraene	-	-	-	pos	-	-	-	-	Benzenoids	Benzene and substituted derivatives	Phenylpropenes
4-Ethylphenol	-	-	C13637	pos	-	-	-	-	Benzenoids	Phenols	1-hydroxy-2-unsubstituted benzenoids
Arginyl-Glutamic acid	-	-	-	pos	-	-	-	-	Organic acids and derivatives	Carboxylic acids and derivatives	Amino acids, peptides, and analogues
Phloroacetophenone 6'-[xylosyl-(1->6)-glucoside]	-	-	-	pos	-	-	-	-	Organic oxygen compounds	Organooxygen compounds	Carbohydrates and carbohydrate conjugates
4-Hydroxy-2,6,6-trimethyl-3-oxo-1,4-cyclohexadiene-1-carboxaldehyde	-	-	-	pos	-	-	-	-	Organic oxygen compounds	Organooxygen compounds	Carbonyl compounds
Monobutylphthalate	-	-	-	pos	-	-	-	-	Benzenoids	Benzene and substituted derivatives	Benzoic acids and derivatives
Betaine aldehyde	map01100;map00260	Metabolic pathways; Glycine, serine and threonine metabolism	C00576	pos	-	-	Metabolism;Metabolism	Global and overview maps;Amino acid metabolism	Organic nitrogen compounds	Organonitrogen compounds	Quaternary ammonium salts
4-formyl Indole	-	-	-	pos	-	-	-	-	-	-	-
Kinetin	-	-	C08272	pos	-	-	-	-	Organoheterocyclic compounds	Imidazopyrimidines	Purines and purine derivatives
6-O-Methylguanine	-	-	-	pos	-	-	-	-	-	-	-
L-Threonine	map01100;map01110;map00970;map00290;map02010;map00860;map01230;map00260;map00261	Metabolic pathways; Biosynthesis of secondary metabolites; Aminoacyl-tRNA biosynthesis; Valine, leucine and isoleucine biosynthesis; ABC transporters; Porphyrin and chlorophyll metabolism; Biosynthesis of amino acids; Glycine, serine and threonine metabolism; Monobactam biosynthesis	C00188	pos	Peptides	Amino acids	Metabolism;Metabolism;Genetic Information Processing;Metabolism;Environmental Information Processing;Metabolism;Metabolism;Metabolism;Metabolism	Global and overview maps;Global and overview maps;Translation;Amino acid metabolism;Membrane transport;Metabolism of cofactors and vitamins;Global and overview maps;Amino acid metabolism;Biosynthesis of other secondary metabolites	Organic acids and derivatives	Carboxylic acids and derivatives	Amino acids, peptides, and analogues
Uracil	map00240;map01100;map00770;map00410	Pyrimidine metabolism; Metabolic pathways; Pantothenate and CoA biosynthesis; beta-Alanine metabolism	C00106	pos	Nucleic acids	Bases	Metabolism;Metabolism;Metabolism;Metabolism	Nucleotide metabolism;Global and overview maps;Metabolism of cofactors and vitamins;Metabolism of other amino acids	Organoheterocyclic compounds	Diazines	Pyrimidines and pyrimidine derivatives
Acetylhomoserine	-	-	-	pos	-	-	-	-	Organic acids and derivatives	Carboxylic acids and derivatives	Amino acids, peptides, and analogues
Thiazolidine-4-carboxylic acid	-	-	-	pos	-	-	-	-	-	-	-
Glycerophosphocholine	map00565;map00564	Ether lipid metabolism; Glycerophospholipid metabolism	C00670	pos	-	-	Metabolism;Metabolism	Lipid metabolism;Lipid metabolism	Lipids and lipid-like molecules	Glycerophospholipids	Glycerophosphocholines
3-Isopropylmalate	map01100;map01210;map01110;map01230;map00290	Metabolic pathways; 2-Oxocarboxylic acid metabolism; Biosynthesis of secondary metabolites; Biosynthesis of amino acids; Valine, leucine and isoleucine biosynthesis	C04411	neg	-	-	Metabolism;Metabolism;Metabolism;Metabolism;Metabolism	Global and overview maps;Global and overview maps;Global and overview maps;Global and overview maps;Amino acid metabolism	Lipids and lipid-like molecules	Fatty Acyls	Fatty acids and conjugates
Zizybeoside I	-	-	C17564	neg	-	-	-	-	Organic oxygen compounds	Organooxygen compounds	Carbohydrates and carbohydrate conjugates
Uridine	map00240;map01100;map02010	Pyrimidine metabolism; Metabolic pathways; ABC transporters	C00299	neg	Nucleic acids	Nucleosides	Metabolism;Metabolism;Environmental Information Processing	Nucleotide metabolism;Global and overview maps;Membrane transport	Nucleosides, nucleotides, and analogues	Pyrimidine nucleosides	Not Available
Xanthine	map01100;map01110;map00230;map00232	Metabolic pathways; Biosynthesis of secondary metabolites; Purine metabolism; Caffeine metabolism	C00385	neg	-	-	Metabolism;Metabolism;Metabolism;Metabolism	Global and overview maps;Global and overview maps;Nucleotide metabolism;Biosynthesis of other secondary metabolites	Organoheterocyclic compounds	Imidazopyrimidines	Purines and purine derivatives
Xanthosine	map01100;map02010;map01110;map00230;map00232	Metabolic pathways; ABC transporters; Biosynthesis of secondary metabolites; Purine metabolism; Caffeine metabolism	C01762	neg	-	-	Metabolism;Environmental Information Processing;Metabolism;Metabolism;Metabolism	Global and overview maps;Membrane transport;Global and overview maps;Nucleotide metabolism;Biosynthesis of other secondary metabolites	Nucleosides, nucleotides, and analogues	Purine nucleosides	Not Available
5-Methoxysalicylic acid	-	-	-	neg	-	-	-	-	Benzenoids	Benzene and substituted derivatives	Benzoic acids and derivatives
Botryodiplodin	-	-	-	neg	-	-	-	-	Organoheterocyclic compounds	Tetrahydrofurans	Not Available
3,4-Dihydroxyphenylpropanoate	map00350	Tyrosine metabolism	C10447	neg	-	-	Metabolism	Amino acid metabolism	-	-	-
Homoveratric acid	-	-	-	neg	-	-	-	-	Benzenoids	Benzene and substituted derivatives	Methoxybenzenes
Domesticoside	-	-	-	neg	-	-	-	-	Organic oxygen compounds	Organooxygen compounds	Carbohydrates and carbohydrate conjugates
Isopropyl apiosylglucoside	-	-	-	neg	-	-	-	-	Organic oxygen compounds	Organooxygen compounds	Carbohydrates and carbohydrate conjugates
(2R,6x)-7-Methyl-3-methylene-1,2,6,7-octanetetrol 2-glucoside	-	-	-	neg	-	-	-	-	Lipids and lipid-like molecules	Fatty Acyls	Fatty acyl glycosides
(R)-Pelletierine	-	-	-	neg	-	-	-	-	Organoheterocyclic compounds	Piperidines	Not Available
Etodolac acyl glucuronide	-	-	-	neg	-	-	-	-	Organic oxygen compounds	Organooxygen compounds	Carbohydrates and carbohydrate conjugates
Phytyl diphosphate	map01100;map00130;map01110;map00900	Metabolic pathways; Ubiquinone and other terpenoid-quinone biosynthesis; Biosynthesis of secondary metabolites; Terpenoid backbone biosynthesis	C05427	neg	-	-	Metabolism;Metabolism;Metabolism;Metabolism	Global and overview maps;Metabolism of cofactors and vitamins;Global and overview maps;Metabolism of terpenoids and polyketides	Lipids and lipid-like molecules	Prenol lipids	Diterpenoids
1-Oleoylglycerophosphoserine	-	-	-	neg	-	-	-	-	Lipids and lipid-like molecules	Glycerophospholipids	Glycerophosphoserines
LysoPC(15:0)	map00564	Glycerophospholipid metabolism	C04230	neg	Lipids	Phospholipids	Metabolism	Lipid metabolism	Lipids and lipid-like molecules	Glycerophospholipids	Glycerophosphocholines
LPC(16:0)	map00564	Glycerophospholipid metabolism	C04230	neg	Lipids	Phospholipids	Metabolism	Lipid metabolism	-	-	-
LPE(16:0)	-	-	-	neg	-	-	-	-	-	-	-
2(R)-hydroxydocosanoic acid	-	-	-	neg	-	-	-	-	Lipids and lipid-like molecules	Fatty Acyls	Fatty acids and conjugates
PA(18:2(9Z,12Z)/18:3(6Z,9Z,12Z))	-	-	-	neg	-	-	-	-	Lipids and lipid-like molecules	Glycerophospholipids	Glycerophosphates
PA(18:2(9Z,12Z)/18:4(6Z,9Z,12Z,15Z))	-	-	-	neg	-	-	-	-	Lipids and lipid-like molecules	Glycerophospholipids	Glycerophosphates
LysoPC(18:0)	map00564	Glycerophospholipid metabolism	C04230	neg	Lipids	Phospholipids	Metabolism	Lipid metabolism	Lipids and lipid-like molecules	Glycerophospholipids	Glycerophosphocholines
LPC(18:3)	map00564	Glycerophospholipid metabolism	C04230	neg	Lipids	Phospholipids	Metabolism	Lipid metabolism	-	-	-
7,8-Dihydrovomifoliol 9-[apiosyl-(1->6)-glucoside]	-	-	-	neg	-	-	-	-	Lipids and lipid-like molecules	Fatty Acyls	Fatty acyl glycosides
Cinncassiol D4 2-glucoside	-	-	-	neg	-	-	-	-	Lipids and lipid-like molecules	Prenol lipids	Terpene glycosides
Hesperetin	map00941	Flavonoid biosynthesis	C01709	neg	-	-	Metabolism	Biosynthesis of other secondary metabolites	Phenylpropanoids and polyketides	Flavonoids	O-methylated flavonoids
Dehydrotomatine	-	-	-	neg	-	-	-	-	Lipids and lipid-like molecules	Steroids and steroid derivatives	Steroidal glycosides
Mangicrocin	-	-	-	neg	-	-	-	-	Lipids and lipid-like molecules	Prenol lipids	Diterpenoids
2-O-Benzoyl-D-glucose	-	-	-	neg	-	-	-	-	Organic oxygen compounds	Organooxygen compounds	Carbohydrates and carbohydrate conjugates
Ferulic acid	map01100;map00940;map01110	Metabolic pathways; Phenylpropanoid biosynthesis; Biosynthesis of secondary metabolites	C01494	neg	-	-	Metabolism;Metabolism;Metabolism	Global and overview maps;Biosynthesis of other secondary metabolites;Global and overview maps	-	-	-
Prolylhydroxyproline	-	-	-	neg	-	-	-	-	Organic acids and derivatives	Carboxylic acids and derivatives	Amino acids, peptides, and analogues
L-Tryptophan	map01100;map01110;map00260;map01210;map00998;map01230;map00966;map00970;map00400;map00380	Metabolic pathways; Biosynthesis of secondary metabolites; Glycine, serine and threonine metabolism; 2-Oxocarboxylic acid metabolism; Biosynthesis of various secondary metabolites - part 2; Biosynthesis of amino acids; Glucosinolate biosynthesis; Aminoacyl-tRNA biosynthesis; Phenylalanine, tyrosine and tryptophan biosynthesis; Tryptophan metabolism	C00078	neg	Peptides	Amino acids	Metabolism;Metabolism;Metabolism;Metabolism;Metabolism;Metabolism;Metabolism;Genetic Information Processing;Metabolism;Metabolism	Global and overview maps;Global and overview maps;Amino acid metabolism;Global and overview maps;Biosynthesis of other secondary metabolites;Global and overview maps;Biosynthesis of other secondary metabolites;Translation;Amino acid metabolism;Amino acid metabolism	Organoheterocyclic compounds	Indoles and derivatives	Indolyl carboxylic acids and derivatives
L-Serine	map01100;map00630;map01110;map00920;map01502;map00460;map00270;map01200;map01230;map00600;map02010;map00260;map00261;map00970	Metabolic pathways; Glyoxylate and dicarboxylate metabolism; Biosynthesis of secondary metabolites; Sulfur metabolism; Vancomycin resistance; Cyanoamino acid metabolism; Cysteine and methionine metabolism; Carbon metabolism; Biosynthesis of amino acids; Sphingolipid metabolism; ABC transporters; Glycine, serine and threonine metabolism; Monobactam biosynthesis; Aminoacyl-tRNA biosynthesis	C00065	neg	Peptides	Amino acids	Metabolism;Metabolism;Metabolism;Metabolism;Human Diseases;Metabolism;Metabolism;Metabolism;Metabolism;Metabolism;Environmental Information Processing;Metabolism;Metabolism;Genetic Information Processing	Global and overview maps;Carbohydrate metabolism;Global and overview maps;Energy metabolism;Drug resistance: antimicrobial;Metabolism of other amino acids;Amino acid metabolism;Global and overview maps;Global and overview maps;Lipid metabolism;Membrane transport;Amino acid metabolism;Biosynthesis of other secondary metabolites;Translation	Organic acids and derivatives	Carboxylic acids and derivatives	Amino acids, peptides, and analogues
Ethyl beta-D-glucopyranoside	-	-	-	neg	-	-	-	-	Organic oxygen compounds	Organooxygen compounds	Carbohydrates and carbohydrate conjugates
