# Supplementary material for: Effect of SlSAHH2 on metabolites in over-expressed and wild-type tomato fruit
Source: PeerJ. 2024 May 29;12:e17466. doi: 10.7717/peerj.17466 (PMC11143970; doi:10.7717/peerj.17466)
Supplement: Supplemental Information 5 [file peerj-12-17466-s005.xlsx]

## Sheet: 6OEvsWT
Details information of the different metabolites of OE-6# vs WT（Corresponding volcano map）
Metabolite	Metab ID	Significant	Regulate	Mode	VIP_PLS-DA	FC(Br_6OE/Br_WT)	P_value	M/Z	Retention time	Formula	VIP_pred_OPLS-DA
L-Glutamine	metab_67	yes	up	pos	2.2445	1.1014	0.01093	147.076	1.305	C5H10N2O3	2.5409
3-Isopropylcatechol	metab_96	yes	up	pos	1.2517	1.0308	0.007341	170.117	3.34075	C9H12O2	1.3359
5E,7Z-Dodecadienal	metab_126	yes	up	pos	1.2707	1.0225	0.0173	198.185	5.7926	C12H20O	1.166
(±)-Naringenin	metab_130	yes	up	pos	2.888	1.1388	0.02921	273.075	5.14042	C15H12O5	3.0972
Muricatenol	metab_196	yes	up	pos	1.3758	1.0426	0.02768	591.496	10.936	C37H68O6	1.5286
2-Aminobut-2-enoate	metab_303	yes	up	pos	2.035	1.0745	0.01845	84.0448	1.28548	C4H7NO2	2.3117
2-Aminomuconic acid semialdehyde	metab_305	yes	up	pos	1.6471	1.0527	0.02167	124.039	1.32363	C6H7NO3	1.8717
Cis-zeatin-9-N-glucoside	metab_387	yes	up	pos	1.2412	1.0327	0.03646	404.151	2.15905	C16H23N5O6	1.3728
Arginyl-Aspartic acid	metab_945	yes	up	pos	3.8626	1.5739	0.02484	307.175	2.61143	C10H19N5O5	4.3331
Guanosine	metab_1133	yes	up	pos	1.8957	1.1016	0.03234	284.098	1.7187	C10H13N5O5	2.1856
(R)-(+)-2-Pyrrolidone-5-carboxylic acid	metab_1266	yes	up	pos	2.277	1.0883	0.01726	130.05	1.28548	C5H7NO3	2.5768
Cytosine	metab_1272	yes	up	pos	1.7695	1.0717	0.04658	112.051	1.305	C4H5N3O	2.0268
Guanine	metab_1296	yes	up	pos	1.5383	1.0494	0.022	152.056	1.36352	C5H5N5O	1.7494
L-Isoleucine	metab_1433	yes	up	pos	1.5028	1.0526	0.04268	132.102	1.69677	C6H13NO2	1.6449
5'-Deoxy-5'-(methylthio)adenosine	metab_1593	yes	up	pos	1.8641	1.0792	0.01992	298.096	2.29213	C11H15N5O3S	2.0615
2,4-Undecadiene-8,10-diynoic acid 2,3-dehydropiperidide	metab_1753	yes	up	pos	2.2697	1.1844	0.04647	240.137	3.05218	C16H17NO	2.4982
Dehydrovomifoliol	metab_2033	yes	up	pos	2.1302	1.1328	0.02295	187.111	4.65663	C13H18O3	2.4178
Kaempferol	metab_2045	yes	up	pos	1.5226	1.0615	0.03198	287.054	4.8333	C15H10O6	1.6652
12-OPDA	metab_2251	yes	up	pos	1.6888	1.0629	0.02175	293.21	7.56457	C18H28O3	1.8834
Asiminenin A	metab_3329	yes	up	pos	2.3642	1.1059	0.003697	629.473	10.9581	C37H66O6	2.6014
Squamotacin	metab_3424	yes	up	pos	2.3549	1.1274	0.01925	645.467	10.5637	C37H66O7	2.6372
Myristoleic acid	metab_4115	yes	up	pos	1.3115	1.0267	0.03023	268.226	5.7926	C14H26O2	1.1171
2,2,6,7-Tetramethylbicyclo[4.3.0]nona-1(9),4-diene-7,8-diol	metab_4116	yes	up	pos	1.2465	1.0208	0.02247	226.179	5.7926	C13H20O2	1.1364
Butyl glucosinolate	metab_4170	yes	up	pos	3.2879	1.338	0.02235	398.053	5.16237	C11H21NO9S2	3.5148
Ramentaceone	metab_4174	yes	up	pos	2.9861	1.2948	0.02702	189.054	5.14042	C11H8O3	3.2077
2,3-Dihydroxy-2'-carboxybiphenyl	metab_4176	yes	up	pos	3.2286	1.362	0.02951	231.064	5.14042	C13H10O4	3.4396
N-Acetyl-5-methoxykynuramine	metab_4178	yes	up	pos	2.978	1.2129	0.0307	275.08	5.14042	C12H16N2O3	3.1915
Heteroxanthin	metab_4205	yes	up	pos	3.0372	1.2649	0.02524	664.439	4.94335	C40H56O4	3.1939
Genistein	metab_4237	yes	up	pos	2.9862	1.3156	0.01579	271.059	4.63473	C15H10O5	3.2293
3-p-Coumaroyl-1,5-quinolactone	metab_4396	yes	up	pos	4.3246	1.6172	0.0007884	285.075	3.87052	C16H16O7	4.7794
Spirotaccagenin	metab_4439	yes	up	pos	2.3155	1.1457	0.01506	488.335	3.7157	C27H42O5	2.5898
Arginyl-Glutamic acid	metab_4764	yes	up	pos	3.4279	1.4584	0.01265	321.191	2.67657	C11H21N5O5	3.6881
Coumarin	metab_4930	yes	up	pos	4.0212	1.3822	0.001312	147.044	2.29213	C9H6O2	4.5001
Hypoxanthine	metab_5191	yes	up	pos	1.539	1.0753	0.04934	137.045	1.7627	C5H4N4O	1.7112
Piperidine	metab_5220	yes	up	pos	1.6524	1.0589	0.04672	86.0969	1.69677	C5H11N	1.8168
Uracil	metab_5462	yes	up	pos	1.9797	1.1056	0.03183	113.035	1.38268	C4H4N2O2	2.2296
2,3-Dimethyl-3-hydroxyglutaric acid	metab_5495	yes	up	pos	1.7309	1.0628	0.01348	218.101	1.34338	C7H12O5	1.8497
(R)-b-amino-isobutyric acid	metab_5515	yes	up	pos	2.9754	1.2401	0.003669	104.071	1.34338	C4H9NO2	3.2855
2-Pyrrolidinone	metab_5583	yes	up	pos	2.5223	1.1447	0.008659	86.0604	1.2657	C4H7NO	2.8031
L-Histidine	metab_5629	yes	up	pos	2.1156	1.1383	0.04563	156.076	1.18465	C6H9N3O2	2.3461
4-Pyrimidine Methanamine (hydrochloride)	metab_5631	yes	up	pos	2.0867	1.108	0.02795	110.071	1.18465	C5H7N3	2.3071
2,3,4,6-tetrahydroxybenzaldehyde	metab_5811	yes	up	neg	2.8461	1.1624	0.03402	151.003	5.1429	C7H6O5	3.0449
Gallic acid	metab_5957	yes	up	neg	1.6308	1.0764	0.041	169.013	2.38628	C7H6O5	1.759
1,3-Dicaffeoylquinic acid	metab_6103	yes	up	neg	1.9732	1.0797	0.03152	515.119	3.85078	C25H24O12	2.1262
Pyroglutamic acid	metab_6413	yes	up	neg	2.1566	1.1029	0.001448	128.034	1.63305	C5H7NO3	2.3166
Flumioxazin	metab_6636	yes	up	neg	1.3038	1.0377	0.01124	399.099	2.4961	C19H15FN2O4	1.3478
HIERACIN	metab_7036	yes	up	neg	2.5719	1.2102	0.0474	301.035	4.78742	C15H10O7	2.7111
Cis-Resveratrol	metab_7069	yes	up	neg	2.8482	1.2021	0.03484	227.071	5.1429	C14H12O3	3.0489
Osmundalactone	metab_7072	yes	up	neg	2.3713	1.2471	0.03579	149.023	5.18722	C6H8O3	2.5631
9(S)-HODE	metab_8511	yes	up	neg	1.3916	1.0505	0.0314	295.228	8.2943	C18H32O3	1.4278
1-(4-methoxyphenyl)pentan-3-ol	metab_8721	yes	up	neg	1.545	1.0697	0.0127	239.128	5.40813	C12H18O2	1.6258
PHLORACETOPHENONE	metab_8736	yes	up	neg	3.1662	1.5168	0.04351	167.034	5.23083	C8H8O4	3.4279
2-Hydroxycarbamazepine	metab_8750	yes	up	neg	2.8899	1.1944	0.03413	273.067	5.1429	C15H12N2O2	3.0899
ESCULETIN	metab_8752	yes	up	neg	2.8876	1.2111	0.03358	177.018	5.1429	C9H6O4	3.0918
2-Benzofurancarboxaldehyde	metab_8753	yes	up	neg	2.9547	1.305	0.03536	145.028	5.1429	C9H6O2	3.1474
Gamma-Glutamyltryptophan	metab_9472	yes	up	neg	3.0305	1.3594	0.02073	378.134	2.07478	C16H19N3O5	3.2979
P-Salicylic acid	metab_9495	yes	up	neg	1.2012	1.0379	0.03235	137.023	2.0525	C7H6O3	1.3012
Uridine diphosphate (UDP)	metab_9632	yes	up	neg	1.5008	1.0568	0.02646	402.994	1.43923	C9H14N2O12P2	1.6871
PA(18:2(9Z,12Z)/22:5(7Z,10Z,13Z,16Z,19Z))	metab_651	yes	down	pos	1.8091	0.9476	0.0285	769.483	10.5191	C43H71O8P	1.8194
Prednisone	metab_7427	yes	down	neg	1.0101	0.9795	0.02	379.156	9.93585	C21H26O5	1.103
Pisumionoside	metab_9012	yes	down	neg	1.5406	0.9515	0.006117	449.203	3.58375	C19H32O9	1.5657
3-O-Feruloylquinic acid	metab_9123	yes	down	neg	2.2345	0.891	0.02213	367.103	3.07242	C17H20O9	2.4146
L-Tryptophan	metab_9340	yes	down	neg	1.9901	0.9137	0.02881	203.082	2.40825	C11H12N2O2	2.2174
