# Supplementary material for: Effect of SlSAHH2 on metabolites in over-expressed and wild-type tomato fruit
Source: PeerJ. 2024 May 29;12:e17466. doi: 10.7717/peerj.17466 (PMC11143970; doi:10.7717/peerj.17466)
Supplement: Supplemental Information 6 [file peerj-12-17466-s006.xlsx]

## Sheet: WTvs6OE
Detail information of metabolites in OE-6# vs WT group classified in the HMDB database
Metabolite	Metab ID	KEGG Pathway ID	KEGG Pathway Description	KEGG Compound ID	Mode	KEGG Compound First Category	KEGG Compound Second Category	KEGG Pathway First Category	KEGG Pathway Second Category	HMDB Superclass	HMDB Class	HMDB Subclass
L-Glutamine	metab_67	map01100;map00630;map00220;map00230;map02010;map00910;map01230;map00240;map00250;map00970	Metabolic pathways; Glyoxylate and dicarboxylate metabolism; Arginine biosynthesis; Purine metabolism; ABC transporters; Nitrogen metabolism; Biosynthesis of amino acids; Pyrimidine metabolism; Alanine, aspartate and glutamate metabolism; Aminoacyl-tRNA biosynthesis	C00064	pos	Peptides	Amino acids	Metabolism;Metabolism;Metabolism;Metabolism;Environmental Information Processing;Metabolism;Metabolism;Metabolism;Metabolism;Genetic Information Processing	Global and overview maps;Carbohydrate metabolism;Amino acid metabolism;Nucleotide metabolism;Membrane transport;Energy metabolism;Global and overview maps;Nucleotide metabolism;Amino acid metabolism;Translation	Organic acids and derivatives	Carboxylic acids and derivatives	Amino acids, peptides, and analogues
3-Isopropylcatechol	metab_96	-	-	C01014	pos	-	-	-	-	-	-	-
5E,7Z-Dodecadienal	metab_126	-	-	-	pos	-	-	-	-	-	-	-
(±)-Naringenin	metab_130	-	-	-	pos	-	-	-	-	-	-	-
Muricatenol	metab_196	-	-	-	pos	-	-	-	-	Lipids and lipid-like molecules	Fatty Acyls	Fatty alcohols
2-Aminobut-2-enoate	metab_303	-	-	C17234	pos	-	-	-	-	-	-	-
2-Aminomuconic acid semialdehyde	metab_305	map01100;map00380	Metabolic pathways; Tryptophan metabolism	C03824	pos	-	-	Metabolism;Metabolism	Global and overview maps;Amino acid metabolism	Organic acids and derivatives	Carboxylic acids and derivatives	Amino acids, peptides, and analogues
Cis-zeatin-9-N-glucoside	metab_387	-	-	-	pos	-	-	-	-	Organic oxygen compounds	Organooxygen compounds	Carbohydrates and carbohydrate conjugates
PA(18:2(9Z,12Z)/22:5(7Z,10Z,13Z,16Z,19Z))	metab_651	-	-	-	pos	-	-	-	-	Lipids and lipid-like molecules	Glycerophospholipids	Glycerophosphates
Arginyl-Aspartic acid	metab_945	-	-	-	pos	-	-	-	-	Organic acids and derivatives	Carboxylic acids and derivatives	Amino acids, peptides, and analogues
Guanosine	metab_1133	map01100;map02010;map00230	Metabolic pathways; ABC transporters; Purine metabolism	C00387	pos	Nucleic acids	Nucleosides	Metabolism;Environmental Information Processing;Metabolism	Global and overview maps;Membrane transport;Nucleotide metabolism	Nucleosides, nucleotides, and analogues	Purine nucleosides	Not Available
(R)-(+)-2-Pyrrolidone-5-carboxylic acid	metab_1266	map01100	Metabolic pathways	C02237	pos	-	-	Metabolism	Global and overview maps	-	-	-
Cytosine	metab_1272	map00240;map01100	Pyrimidine metabolism; Metabolic pathways	C00380	pos	Nucleic acids	Bases	Metabolism;Metabolism	Nucleotide metabolism;Global and overview maps	Organoheterocyclic compounds	Diazines	Pyrimidines and pyrimidine derivatives
Guanine	metab_1296	map01100;map00230	Metabolic pathways; Purine metabolism	C00242	pos	Nucleic acids	Bases	Metabolism;Metabolism	Global and overview maps;Nucleotide metabolism	Organoheterocyclic compounds	Imidazopyrimidines	Purines and purine derivatives
L-Isoleucine	metab_1433	map01100;map01110;map00280;map00290;map01210;map00960;map02010;map01230;map00966;map00460;map00970	Metabolic pathways; Biosynthesis of secondary metabolites; Valine, leucine and isoleucine degradation; Valine, leucine and isoleucine biosynthesis; 2-Oxocarboxylic acid metabolism; Tropane, piperidine and pyridine alkaloid biosynthesis; ABC transporters; Biosynthesis of amino acids; Glucosinolate biosynthesis; Cyanoamino acid metabolism; Aminoacyl-tRNA biosynthesis	C00407	pos	Peptides	Amino acids	Metabolism;Metabolism;Metabolism;Metabolism;Metabolism;Metabolism;Environmental Information Processing;Metabolism;Metabolism;Metabolism;Genetic Information Processing	Global and overview maps;Global and overview maps;Amino acid metabolism;Amino acid metabolism;Global and overview maps;Biosynthesis of other secondary metabolites;Membrane transport;Global and overview maps;Biosynthesis of other secondary metabolites;Metabolism of other amino acids;Translation	Organic acids and derivatives	Carboxylic acids and derivatives	Amino acids, peptides, and analogues
5'-Deoxy-5'-(methylthio)adenosine	metab_1593	map01100;map00270;map00908	Metabolic pathways; Cysteine and methionine metabolism; Zeatin biosynthesis	C00170	pos	-	-	Metabolism;Metabolism;Metabolism	Global and overview maps;Amino acid metabolism;Metabolism of terpenoids and polyketides	-	-	-
2,4-Undecadiene-8,10-diynoic acid 2,3-dehydropiperidide	metab_1753	-	-	-	pos	-	-	-	-	Organoheterocyclic compounds	Pyridines and derivatives	Hydropyridines
Dehydrovomifoliol	metab_2033	-	-	C04223;C02533	pos	-	-	-	-	Lipids and lipid-like molecules	Prenol lipids	Sesquiterpenoids
Kaempferol	metab_2045	map01100;map00941;map01110;map00944	Metabolic pathways; Flavonoid biosynthesis; Biosynthesis of secondary metabolites; Flavone and flavonol biosynthesis	C05903	pos	-	-	Metabolism;Metabolism;Metabolism;Metabolism	Global and overview maps;Biosynthesis of other secondary metabolites;Global and overview maps;Biosynthesis of other secondary metabolites	Phenylpropanoids and polyketides	Flavonoids	Flavones
12-OPDA	metab_2251	map01100;map00592;map01110	Metabolic pathways; alpha-Linolenic acid metabolism; Biosynthesis of secondary metabolites	C01226	pos	-	-	Metabolism;Metabolism;Metabolism	Global and overview maps;Lipid metabolism;Global and overview maps	-	-	-
Asiminenin A	metab_3329	-	-	-	pos	-	-	-	-	Lipids and lipid-like molecules	Fatty Acyls	Fatty alcohols
Squamotacin	metab_3424	-	-	-	pos	-	-	-	-	Lipids and lipid-like molecules	Fatty Acyls	Fatty alcohols
Myristoleic acid	metab_4115	-	-	C08322	pos	-	-	-	-	Lipids and lipid-like molecules	Fatty Acyls	Fatty acids and conjugates
2,2,6,7-Tetramethylbicyclo[4.3.0]nona-1(9),4-diene-7,8-diol	metab_4116	-	-	-	pos	-	-	-	-	Organic oxygen compounds	Organooxygen compounds	Alcohols and polyols
Butyl glucosinolate	metab_4170	-	-	-	pos	-	-	-	-	Organic oxygen compounds	Organooxygen compounds	Carbohydrates and carbohydrate conjugates
Ramentaceone	metab_4174	-	-	C10398	pos	-	-	-	-	-	-	-
2,3-Dihydroxy-2'-carboxybiphenyl	metab_4176	map01100	Metabolic pathways	C16263	pos	-	-	Metabolism	Global and overview maps	-	-	-
N-Acetyl-5-methoxykynuramine	metab_4178	-	-	-	pos	-	-	-	-	Organic oxygen compounds	Organooxygen compounds	Carbonyl compounds
Heteroxanthin	metab_4205	map01100;map01110;map00232	Metabolic pathways; Biosynthesis of secondary metabolites; Caffeine metabolism	C16353	pos	-	-	Metabolism;Metabolism;Metabolism	Global and overview maps;Global and overview maps;Biosynthesis of other secondary metabolites	Lipids and lipid-like molecules	Prenol lipids	Triterpenoids
Genistein	metab_4237	map01100;map01110	Metabolic pathways; Biosynthesis of secondary metabolites	C09126;C06563	pos	-	-	Metabolism;Metabolism	Global and overview maps;Global and overview maps	Phenylpropanoids and polyketides	Isoflavonoids	Isoflav-2-enes
3-p-Coumaroyl-1,5-quinolactone	metab_4396	-	-	-	pos	-	-	-	-	Phenylpropanoids and polyketides	Cinnamic acids and derivatives	Hydroxycinnamic acids and derivatives
Spirotaccagenin	metab_4439	-	-	-	pos	-	-	-	-	Lipids and lipid-like molecules	Prenol lipids	Triterpenoids
Arginyl-Glutamic acid	metab_4764	-	-	-	pos	-	-	-	-	Organic acids and derivatives	Carboxylic acids and derivatives	Amino acids, peptides, and analogues
Coumarin	metab_4930	map00940;map01110	Phenylpropanoid biosynthesis; Biosynthesis of secondary metabolites	C05851	pos	-	-	Metabolism;Metabolism	Biosynthesis of other secondary metabolites;Global and overview maps	Phenylpropanoids and polyketides	Coumarins and derivatives	Not Available
Hypoxanthine	metab_5191	map01100;map00230	Metabolic pathways; Purine metabolism	C00262	pos	-	-	Metabolism;Metabolism	Global and overview maps;Nucleotide metabolism	Organoheterocyclic compounds	Imidazopyrimidines	Purines and purine derivatives
Piperidine	metab_5220	map00960	Tropane, piperidine and pyridine alkaloid biosynthesis	C01746	pos	-	-	Metabolism	Biosynthesis of other secondary metabolites	Organoheterocyclic compounds	Piperidines	Not Available
Uracil	metab_5462	map00240;map01100;map00770;map00410	Pyrimidine metabolism; Metabolic pathways; Pantothenate and CoA biosynthesis; beta-Alanine metabolism	C00106	pos	Nucleic acids	Bases	Metabolism;Metabolism;Metabolism;Metabolism	Nucleotide metabolism;Global and overview maps;Metabolism of cofactors and vitamins;Metabolism of other amino acids	Organoheterocyclic compounds	Diazines	Pyrimidines and pyrimidine derivatives
2,3-Dimethyl-3-hydroxyglutaric acid	metab_5495	-	-	-	pos	-	-	-	-	Lipids and lipid-like molecules	Fatty Acyls	Fatty acids and conjugates
(R)-b-amino-isobutyric acid	metab_5515	-	-	-	pos	-	-	-	-	-	-	-
2-Pyrrolidinone	metab_5583	-	-	C11118	pos	-	-	-	-	Organoheterocyclic compounds	Pyrrolidines	Pyrrolidones
L-Histidine	metab_5629	map01100;map01110;map00340;map02010;map01230;map00970;map00410	Metabolic pathways; Biosynthesis of secondary metabolites; Histidine metabolism; ABC transporters; Biosynthesis of amino acids; Aminoacyl-tRNA biosynthesis; beta-Alanine metabolism	C00135	pos	Peptides	Amino acids	Metabolism;Metabolism;Metabolism;Environmental Information Processing;Metabolism;Genetic Information Processing;Metabolism	Global and overview maps;Global and overview maps;Amino acid metabolism;Membrane transport;Global and overview maps;Translation;Metabolism of other amino acids	Organic acids and derivatives	Carboxylic acids and derivatives	Amino acids, peptides, and analogues
4-Pyrimidine Methanamine (hydrochloride)	metab_5631	-	-	-	pos	-	-	-	-	-	-	-
2,3,4,6-tetrahydroxybenzaldehyde	metab_5811	-	-	-	neg	-	-	-	-	-	-	-
Gallic acid	metab_5957	-	-	C01424	neg	-	-	-	-	Benzenoids	Benzene and substituted derivatives	Benzoic acids and derivatives
1,3-Dicaffeoylquinic acid	metab_6103	-	-	C10445	neg	-	-	-	-	Organic oxygen compounds	Organooxygen compounds	Alcohols and polyols
Pyroglutamic acid	metab_6413	map01100;map00480	Metabolic pathways; Glutathione metabolism	C02237;C01879	neg	-;Peptides	-;Amino acids	Metabolism;Metabolism	Global and overview maps;Metabolism of other amino acids	Organic acids and derivatives	Carboxylic acids and derivatives	Amino acids, peptides, and analogues
Flumioxazin	metab_6636	-	-	C11035	neg	-	-	-	-	Organoheterocyclic compounds	Benzoxazines	Benzoxazinones
HIERACIN	metab_7036	-	-	-	neg	-	-	-	-	-	-	-
Cis-Resveratrol	metab_7069	map01110;map00945	Biosynthesis of secondary metabolites; Stilbenoid, diarylheptanoid and gingerol biosynthesis	C03582	neg	-	-	Metabolism;Metabolism	Global and overview maps;Biosynthesis of other secondary metabolites	-	-	-
Osmundalactone	metab_7072	-	-	-	neg	-	-	-	-	Organoheterocyclic compounds	Pyrans	Pyranones and derivatives
Prednisone	metab_7427	-	-	C07370	neg	-	-	-	-	Lipids and lipid-like molecules	Steroids and steroid derivatives	Hydroxysteroids
9(S)-HODE	metab_8511	map00591	Linoleic acid metabolism	C14767	neg	-	-	Metabolism	Lipid metabolism	-	-	-
1-(4-methoxyphenyl)pentan-3-ol	metab_8721	-	-	-	neg	-	-	-	-	-	-	-
PHLORACETOPHENONE	metab_8736	-	-	-	neg	-	-	-	-	-	-	-
2-Hydroxycarbamazepine	metab_8750	-	-	C16601	neg	-	-	-	-	Alkaloids and derivatives	Morphinans	Not Available
ESCULETIN	metab_8752	-	-	C09263	neg	-	-	-	-	-	-	-
2-Benzofurancarboxaldehyde	metab_8753	-	-	-	neg	-	-	-	-	Organoheterocyclic compounds	Benzofurans	Not Available
Pisumionoside	metab_9012	-	-	-	neg	-	-	-	-	Lipids and lipid-like molecules	Prenol lipids	Terpene glycosides
3-O-Feruloylquinic acid	metab_9123	-	-	C02572	neg	-	-	-	-	Organic oxygen compounds	Organooxygen compounds	Alcohols and polyols
L-Tryptophan	metab_9340	map01100;map01110;map00260;map01210;map00998;map01230;map00966;map00970;map00400;map00380	Metabolic pathways; Biosynthesis of secondary metabolites; Glycine, serine and threonine metabolism; 2-Oxocarboxylic acid metabolism; Biosynthesis of various secondary metabolites - part 2; Biosynthesis of amino acids; Glucosinolate biosynthesis; Aminoacyl-tRNA biosynthesis; Phenylalanine, tyrosine and tryptophan biosynthesis; Tryptophan metabolism	C00078	neg	Peptides	Amino acids	Metabolism;Metabolism;Metabolism;Metabolism;Metabolism;Metabolism;Metabolism;Genetic Information Processing;Metabolism;Metabolism	Global and overview maps;Global and overview maps;Amino acid metabolism;Global and overview maps;Biosynthesis of other secondary metabolites;Global and overview maps;Biosynthesis of other secondary metabolites;Translation;Amino acid metabolism;Amino acid metabolism	Organoheterocyclic compounds	Indoles and derivatives	Indolyl carboxylic acids and derivatives
Gamma-Glutamyltryptophan	metab_9472	-	-	-	neg	-	-	-	-	Organic acids and derivatives	Carboxylic acids and derivatives	Amino acids, peptides, and analogues
P-Salicylic acid	metab_9495	map01100;map00130;map01110;map00790	Metabolic pathways; Ubiquinone and other terpenoid-quinone biosynthesis; Biosynthesis of secondary metabolites; Folate biosynthesis	C00156	neg	-	-	Metabolism;Metabolism;Metabolism;Metabolism	Global and overview maps;Metabolism of cofactors and vitamins;Global and overview maps;Metabolism of cofactors and vitamins	-	-	-
Uridine diphosphate (UDP)	metab_9632	-	-	-	neg	-	-	-	-	-	-	-
