# Supplementary material for: Effect of SlSAHH2 on metabolites in over-expressed and wild-type tomato fruit
Source: PeerJ. 2024 May 29;12:e17466. doi: 10.7717/peerj.17466 (PMC11143970; doi:10.7717/peerj.17466)
Supplement: Supplemental Information 7 [file peerj-12-17466-s007.xlsx]

## Sheet: KEGG富集统计5oeup
Metabolic pathways noted in OE-5# vs WT groups through KEGG enrichment analysis(up-regulated metabolites)
Pathway_ID	Pathway Desciption	Num	Ratio_in_study	Ratio_in_pop	P_value
map00920	Sulfur metabolism	1	1/16	33/4759	0.1055
map00410	beta-Alanine metabolism	1	1/16	32/4759	0.1025
map00780	Biotin metabolism	1	1/16	28/4759	0.09023
map00770	Pantothenate and CoA biosynthesis	1	1/16	28/4759	0.09023
map00565	Ether lipid metabolism	1	1/16	25/4759	0.08094
map00600	Sphingolipid metabolism	1	1/16	25/4759	0.08094
map01502	Vancomycin resistance	1	1/16	24/4759	0.07783
map00460	Cyanoamino acid metabolism	1	1/16	45/4759	0.1412
map00270	Cysteine and methionine metabolism	1	1/16	63/4759	0.1923
map00940	Phenylpropanoid biosynthesis	1	1/16	68/4759	0.206
map00630	Glyoxylate and dicarboxylate metabolism	1	1/16	62/4759	0.1895
map00941	Flavonoid biosynthesis	1	1/16	74/4759	0.2221
map00380	Tryptophan metabolism	1	1/16	83/4759	0.2457
map00860	Porphyrin and chlorophyll metabolism	1	1/16	142/4759	0.3846
map00290	Valine, leucine and isoleucine biosynthesis	2	2/16	23/4759	0.002573
map00232	Caffeine metabolism	2	2/16	22/4759	0.002354
map00261	Monobactam biosynthesis	2	2/16	39/4759	0.007304
map00970	Aminoacyl-tRNA biosynthesis	2	2/16	52/4759	0.01274
map00260	Glycine, serine and threonine metabolism	2	2/16	50/4759	0.01182
map00240	Pyrimidine metabolism	3	3/16	65/4759	0.0012
map00230	Purine metabolism	4	4/16	95/4759	0.0002257
map02010	ABC transporters	5	5/16	137/4759	6.218e-05
map00564	Glycerophospholipid metabolism	5	2/16	52/4759	0.01274
Metabolic pathways noted in OE-5# vs WT groups through KEGG enrichment analysis(down-regulated metabolites)
Pathway id	Pathway Description	Num	Ratio_in_study	Ratio_in_pop	Pvalue
map00400	Phenylalanine, tyrosine and tryptophan biosynthesis	1	1/6	34/4759	0.04213
map00900	Terpenoid backbone biosynthesis	1	1/6	45/4759	0.05544
map00970	Aminoacyl-tRNA biosynthesis	1	1/6	52/4759	0.06383
map00940	Phenylpropanoid biosynthesis	1	1/6	68/4759	0.08277
map00966	Glucosinolate biosynthesis	1	1/6	77/4759	0.09328
map00950	Isoquinoline alkaloid biosynthesis	1	1/6	122/4759	0.1444
map00130	Ubiquinone and other terpenoid-quinone biosynthesis	2	2/6	92/4759	0.005272
map00380	Tryptophan metabolism	2	2/6	83/4759	0.004308
map00998	Biosynthesis of various secondary metabolites - part 2	2	2/6	80/4759	0.004007
map00260	Glycine, serine and threonine metabolism	2	2/6	50/4759	0.00158
map00350	Tyrosine metabolism	2	2/6	78/4759	0.003812
