# Supplementary material for: Effect of SlSAHH2 on metabolites in over-expressed and wild-type tomato fruit
Source: PeerJ. 2024 May 29;12:e17466. doi: 10.7717/peerj.17466 (PMC11143970; doi:10.7717/peerj.17466)
Supplement: Supplemental Information 8 [file peerj-12-17466-s008.xlsx]

## Sheet: KEGG富集分析统计表
Metabolic pathways noted in OE-6# vs WT groups through KEGG enrichment analysis(up-regulated metabolites)
Pathway id	Pathway Description	Num	Ratio_in_study	Ratio_in_pop	Pvalue
map00340	Histidine metabolism	1	1/22	47/4759	0.1965
map00460	Cyanoamino acid metabolism	1	1/22	45/4759	0.189
map00945	Stilbenoid, diarylheptanoid and gingerol biosynthesis	1	1/22	25/4759	0.1096
map00944	Flavone and flavonol biosynthesis	1	1/22	51/4759	0.2115
map00250	Alanine, aspartate and glutamate metabolism	1	1/22	28/4759	0.122
map00770	Pantothenate and CoA biosynthesis	1	1/22	28/4759	0.122
map00591	Linoleic acid metabolism	1	1/22	28/4759	0.122
map00592	alpha-Linolenic acid metabolism	1	1/22	44/4759	0.1852
map00908	Zeatin biosynthesis	1	1/22	39/4759	0.1659
map00280	Valine, leucine and isoleucine degradation	1	1/22	42/4759	0.1775
map00790	Folate biosynthesis	1	1/22	57/4759	0.2333
map00270	Cysteine and methionine metabolism	1	1/22	63/4759	0.2546
map00480	Glutathione metabolism	1	1/22	38/4759	0.162
map00940	Phenylpropanoid biosynthesis	1	1/22	68/4759	0.2719
map00630	Glyoxylate and dicarboxylate metabolism	1	1/22	62/4759	0.2511
map00966	Glucosinolate biosynthesis	1	1/22	77/4759	0.3021
map00941	Flavonoid biosynthesis	1	1/22	74/4759	0.2922
map00220	Arginine biosynthesis	1	1/22	23/4759	0.1013
map00290	Valine, leucine and isoleucine biosynthesis	1	1/22	23/4759	0.1013
map00380	Tryptophan metabolism	1	1/22	83/4759	0.3215
map00910	Nitrogen metabolism	1	1/22	19/4759	0.08443
map00130	Ubiquinone and other terpenoid-quinone biosynthesis	1	1/22	92/4759	0.3498
map00232	Caffeine metabolism	1	1/22	22/4759	0.09712
map00410	beta-Alanine metabolism	2	2/22	32/4759	0.009305
map00960	Tropane, piperidine and pyridine alkaloid biosynthesis	2	2/22	68/4759	0.03867
map00970	Aminoacyl-tRNA biosynthesis	3	3/22	52/4759	0.001637
map00240	Pyrimidine metabolism	3	3/22	65/4759	0.003112
map02010	ABC transporters	4	4/22	137/4759	0.003212
map00230	Purine metabolism	4	4/22	95/4759	0.0008274
Metabolic pathways noted in OE-6# vs WT groups through KEGG enrichment analysis(down-regulated metabolites)
Pathway id	Pathway Description	Num	Ratio_in_study	Ratio_in_pop	Pvalue
map00380	Tryptophan metabolism	1	1/1	83/4759	0.01744
map00998	Biosynthesis of various secondary metabolites - part 2	1	1/1	80/4759	0.01681
map00970	Aminoacyl-tRNA biosynthesis	1	1/1	52/4759	0.01093
map00966	Glucosinolate biosynthesis	1	1/1	77/4759	0.01618
map00260	Glycine, serine and threonine metabolism	1	1/1	50/4759	0.01051
map00400	Phenylalanine, tyrosine and tryptophan biosynthesis	1	1/1	34/4759	0.007144
